# Supplementary material for: Stereoselective synthesis of oxazolidinonyl-fused piperidines of interest as selective muscarinic (M1) receptor agonists: a novel M1 allosteric modulator
Source: Royal Society of Chemistry journal article supplement (doi:10.1039/c5ob02588e), 2016-01-01
Supplement: c5ob02588e7.pdf [file c5ob02588e7.pdf]

## **Stereoselective synthesis of oxazolidinonyl-fused piperidines of interest as selective muscarinic (M<sub>1</sub>) receptor agonists**

Kenneth J. Broadley, Maxime G. P. Buffat, Erica Burnell, Robin H. Davies, Xavier Moreau, Stephen Snee and Eric J. Thomas

### **Supplementary Data**

Studies of the allosteric effect of piperidine **64**.

## Report on M<sub>1</sub> receptor activity of piperidine 64 on rat duodenum

### Aims

1. To evaluate piperidine 64 (MGN) as an allosteric agonist at M<sub>1</sub> muscarinic receptors of rat duodenum.
2. To evaluate MGN as an antagonist of muscarinic M<sub>3</sub> receptors in guinea-pig ileum

### Methods

M<sub>1</sub> receptor-mediated functional responses were measured as the relaxation responses of rat duodenum as characterized in this laboratory previously (Hamrouni, Gudka and Broadley, 2006). Isolated segments (1-2cm) of rat duodenum or guinea-pig ileum were set up in tissue baths containing Tyrodes solution (mM): NaCl, 137; KCl, 2.68; CaCl<sub>2</sub>, 1.82; NaHCO<sub>3</sub>, 5.9; MgCl<sub>2</sub>, 1.0; NaH<sub>2</sub>PO<sub>4</sub>, 0.42; glucose, 5.6 gassed with O<sub>2</sub> 95% and CO<sub>2</sub> 5% and maintained at 37°C. Isometric tension was recorded by connecting one end of the tissue to a tissue holder and the other to a transducer, by means of a cotton thread. Duodenum was progressively stretched to a resting tension of 1.5g while ileum had a resting tension of 0.5g applied. Isometric tension was measured by force transducers (Ormed, Welwyn Garden City, Hertfordshire, UK) coupled to a PowerLab/4SP computer system (AD Instruments, Charlgrove, Oxfordshire, UK) for data collection. Data was analysed using Chart v.4.1.1 software (AD Instruments, Charlgrove, Oxfordshire, UK).

Concentration-response curves were constructed in the duodenum by adding either McN-A-343 or MGN to the bath non-cumulatively in increasing half logarithmic concentrations. Each dose was left in the bath for 1 min or until a maximum effect was produced. It was then washed from the bath and a 10 min interval allowed before the next dose was introduced. To examine the effect of MGN on responses to McN-A-343, a concentration-response curve for McN-A-343 was obtained first and in the same tissue repeated in the presence of MGN (10<sup>-7</sup> M). MGN was added to the bath 15 min before each dose of McN-A-343.

Responses of the duodenum were measured as the maximum fall in tension (g) from the maximum baseline tension observed prior to addition of McN-A-343.

Concentration-response curves in the ileum to methacholine, a muscarinic agonist, were constructed by cumulative addition of increasing doses until the maximum contraction was achieved. MGM-M1-10A (0.1µM) or its vehicle (DMSO) were added to the tissue bath and allowed to equilibrate for 15 min before a second curve was constructed in their presence. Responses of the ileum were measured as the increase in contraction above the pre-concentration-response curve base line.

### Results

MGN (0.1µM) did not affect the resting rhythmic activity of the rat duodenum, indicating that there was no direct agonist (orthosteric) activity at M<sub>1</sub> receptors. However, in its presence there was a shift of the dose-response curve for the relaxation by McN-A-343 to the left (Fig 1). This indicates POTENTIATION of the responses. By contrast, the vehicle for MGM-M1-10A, DMSO, had no effect on the dose-response curves for the M<sub>1</sub> receptor agonist (Fig 2).

The same concentration of MGM-M1-10A (0.1 $\mu$ M) had a small inhibitory effect on the concentration-response curve for methacholine contractions on the guinea-pig ileum (Fig 3). However, this shift to the right was not significant.

#### MGN (0.1 $\mu$ M) vs McN-A-343 n=4

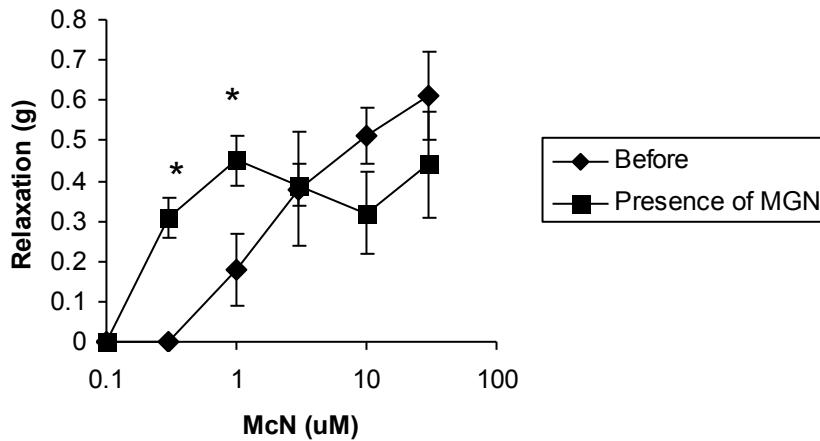

Figure 1 Effect of MGN-M1-10A (0.1 $\mu$ M) on relaxation responses of rat duodenum to the selective M<sub>1</sub> receptor agonist McN-A-343. \* significantly different from values in the absence of MGN-M3-10A p<0.05 Student's paired t-test.

#### DMSO vs McN-A-343 n=4

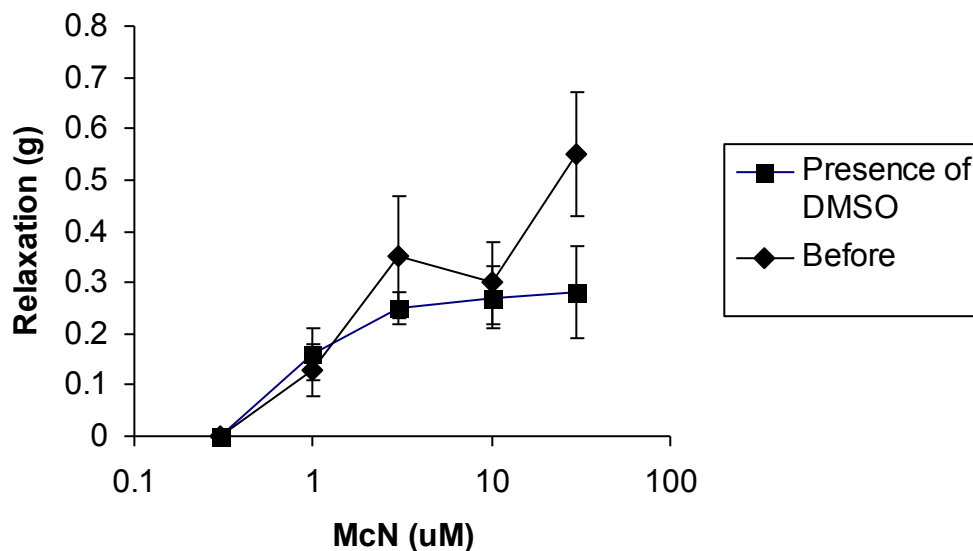

Figure 2 Effect of DMSO on relaxation responses of rat duodenum to the selective M<sub>1</sub> receptor agonist McN-A-343.

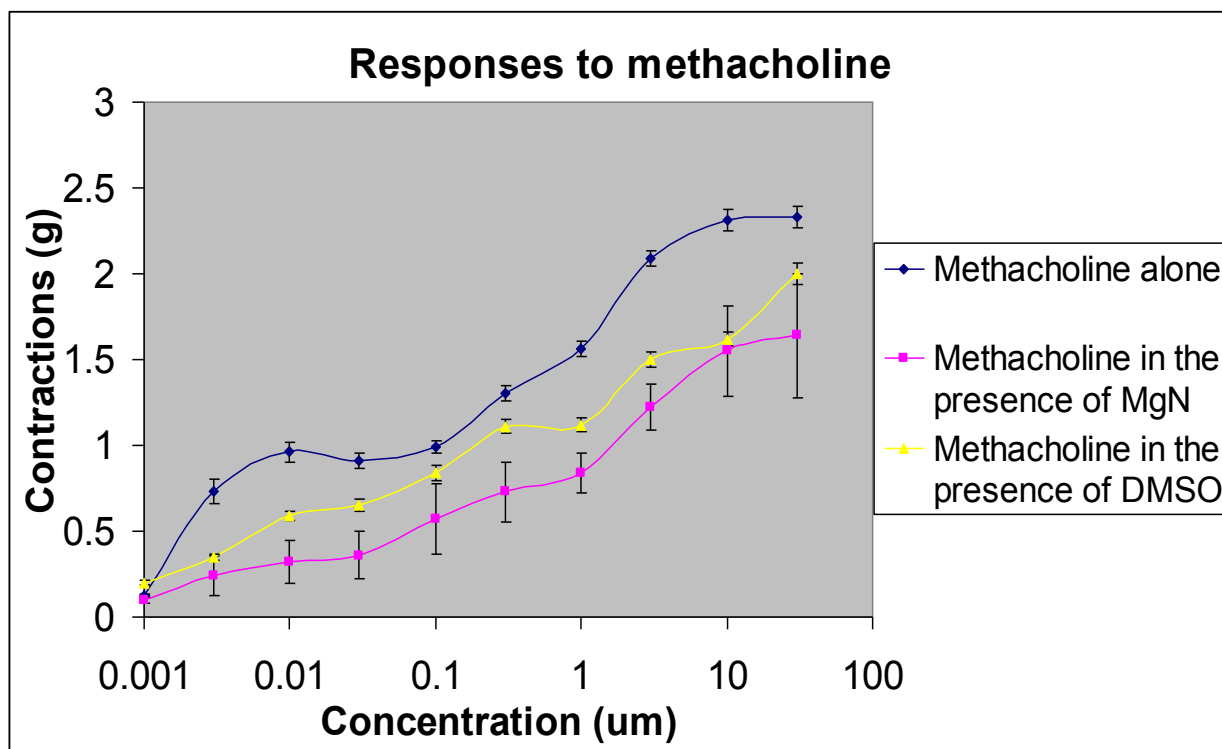

Figure 3 Contractions of isolated guinea-pig ileum to methacholine, added cumulatively. Effects of MGN-M1-10A (0.1µm) and DMSO on the concentration-response curve for methacholine. After addition of MGN/DMSO, methacholine was added to the bath cumulatively.

### Conclusion

Piperidine **64** (MGN) appears to be a positive allosteric modulator of the muscarinic M<sub>1</sub> receptor as it potentiates the effects of an M<sub>1</sub> receptor agonist without causing agonist activity on its own or antagonistic activity. There was minimal activity at M<sub>3</sub> receptors of the guinea-pig ileum as the contractions to methacholine were slightly shifted to the right by MGN-M1-10A.

### Reference

Hamrouni, AM, Gudka N & Broadley KJ (2006) Investigation of the mechanism for the relaxation of rat duodenum mediated via M<sub>1</sub> muscarinic receptors. *Auton Atacoid Pharmacol* 26, 275-284.
