# Supplementary material for: Stereoselective synthesis of oxazolidinonyl-fused piperidines of interest as selective muscarinic (M1) receptor agonists: a novel M1 allosteric modulator
Source: Royal Society of Chemistry journal article supplement (doi:10.1039/c5ob02588e), 2016-01-01
Supplement: c5ob02588e8.pdf [file c5ob02588e8.pdf]

## **Stereoselective synthesis of oxazolidinonyl-fused piperidines of interest as selective muscarinic (M<sub>1</sub>) receptor agonists**

Kenneth J. Broadley, Maxime G. P. Buffat, Erica Burnell, Robin H. Davies, Xavier Moreau, Stephen Snee and Eric J. Thomas

### **Supplementary Data**

Copies of <sup>1</sup>H and <sup>13</sup>C NMR spectra of key compounds – in numerical order.

M Buffat  
 MB161570C  
 cdcl3  
 Inova 400 (JF)  
 Aramis  
 Proton 400MHz  
 10.10.02  
 100204lnoe

Solvent: cdcl3  
 Ambient temperature  
 User: 1-12-87  
 File: 1002041  
 DATE Oct 10 2002  
 INOVA-300 "solids"

PULSE SEQUENCE  
 Relax. delay 30.000 sec  
 Pulse 36.0 degrees  
 Acq. time 4.008 sec  
 Width 3559.2 Hz  
 64 repetitions

OBSERVE HL, 399.9584369 MHz  
 DECOUPLE HL, 399.9598074 MHz  
 Power 0 dB  
 off during acquisition  
 on during delay  
 single frequency  
 DATA PROCESSING  
 Line broadening 0.5 Hz  
 FT size 65536  
 Total time 74 minutes

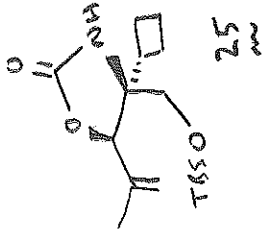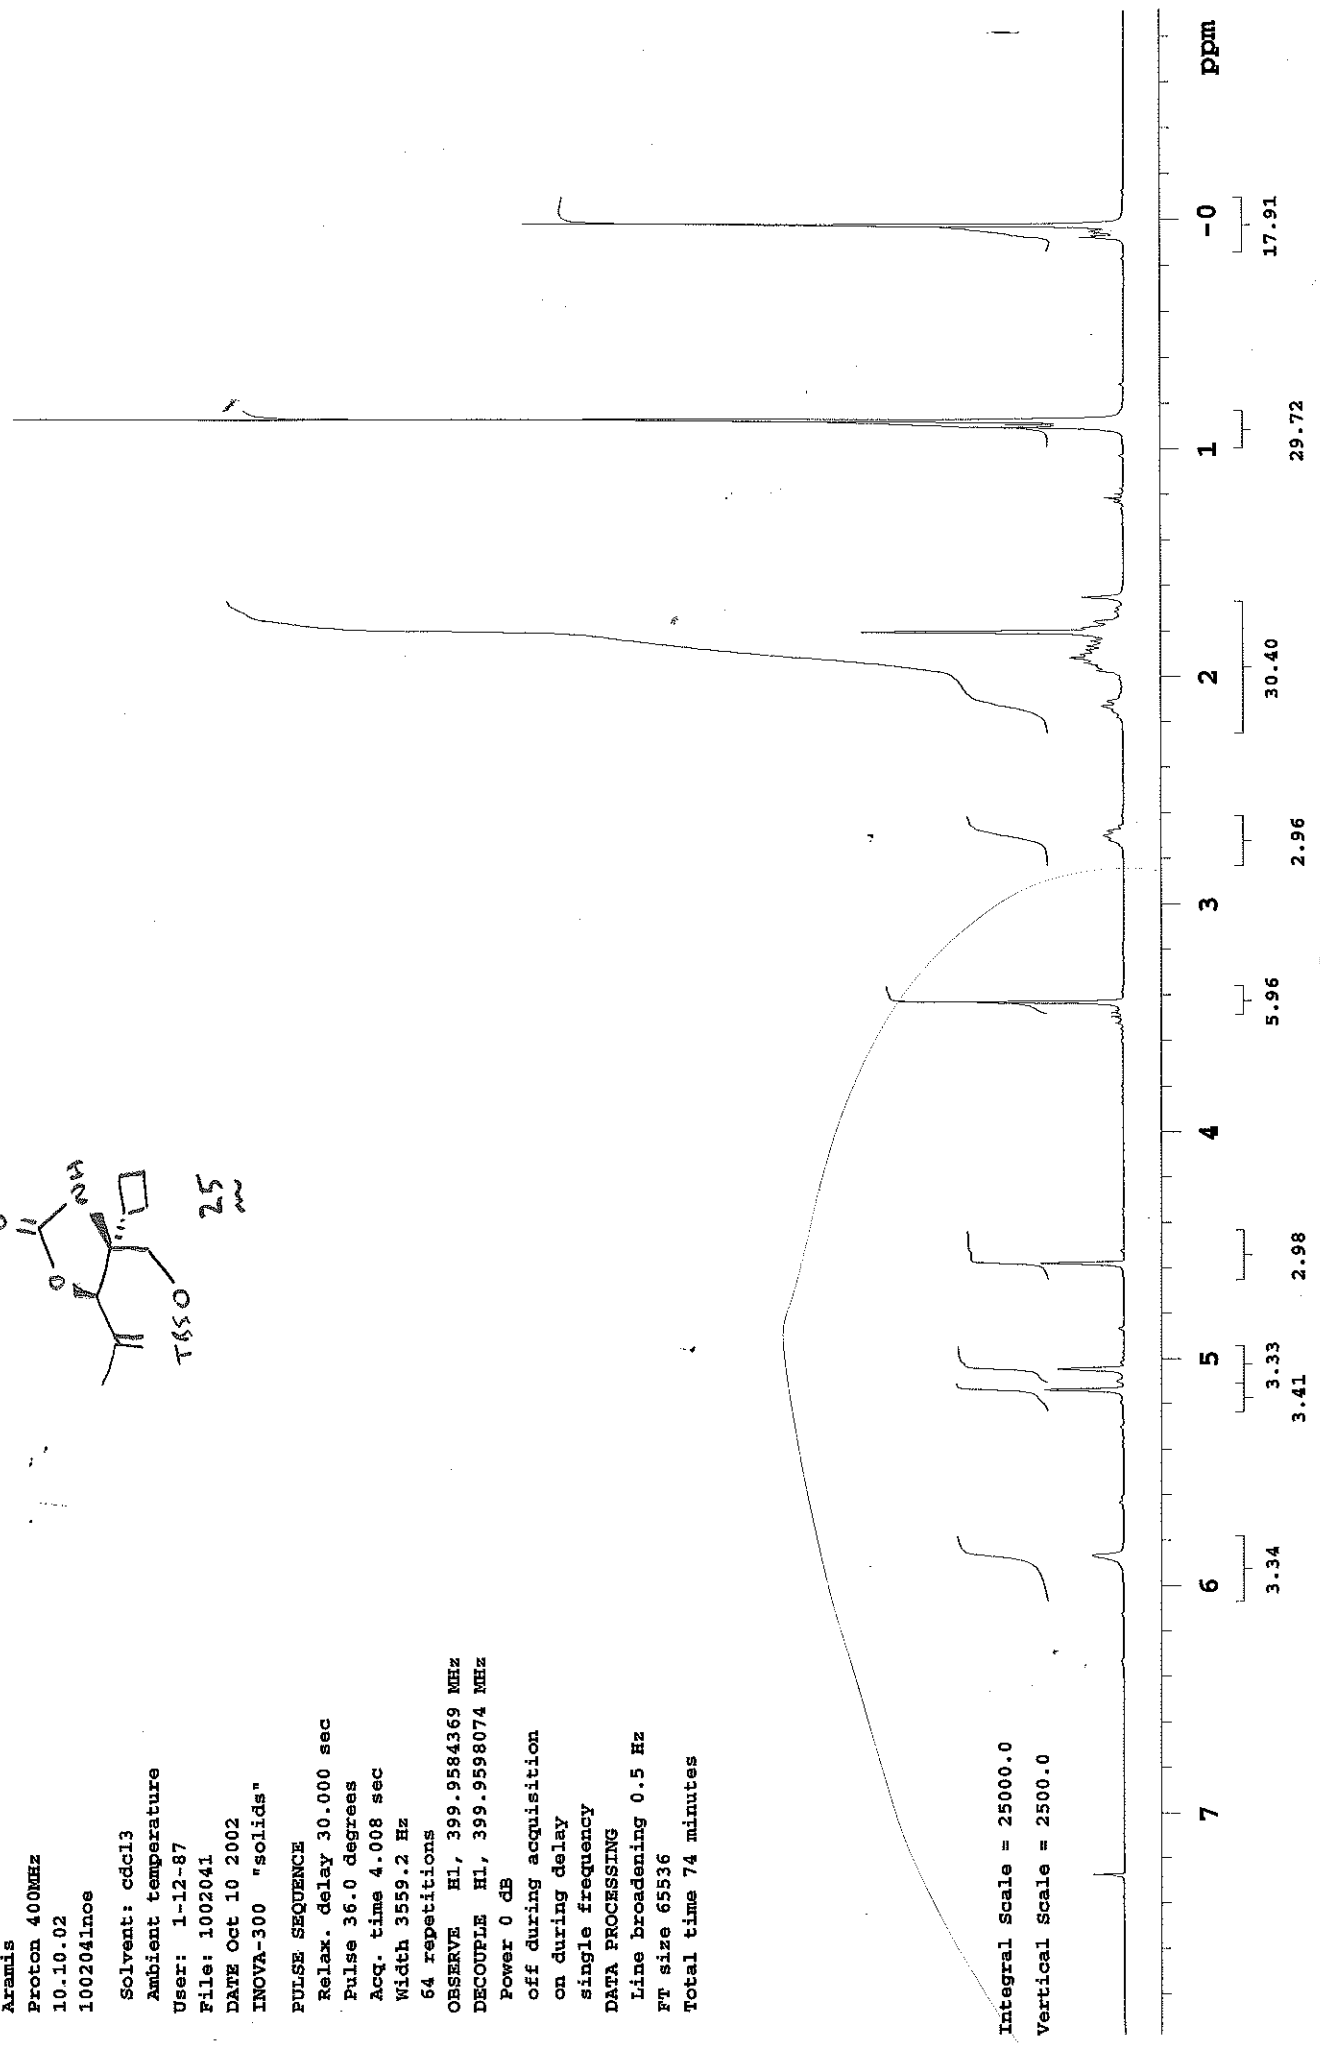

Integral Scale = 25000.0  
 Vertical Scale = 2500.0

Buffat Maxime  
MB/6/570/C  
cdcl3  
Inova 400 (GS)  
Aramis  
13C 100MHz  
09.10.02  
1002041c

Solvent: cdcl3  
Ambient temperature  
File: 1002041  
DATE Oct 9 2002  
INOVA-300 "solids"

PULSE SEQUENCE

Pulse 36.0 degrees  
Acq. time 1.311 sec  
Width 25000.0 Hz  
37712 repetitions

OBSERVE C13, 100.5696317 MHz  
DECOUPLE H1, 399.9597752 MHz  
Power 38 dB

continuously on

WALTZ-16 modulated

DATA PROCESSING

Line broadening 1.0 Hz

FT size 65536

Total time 13.7 hours

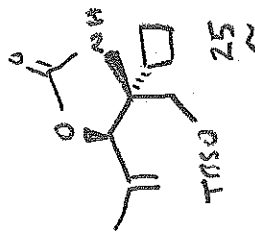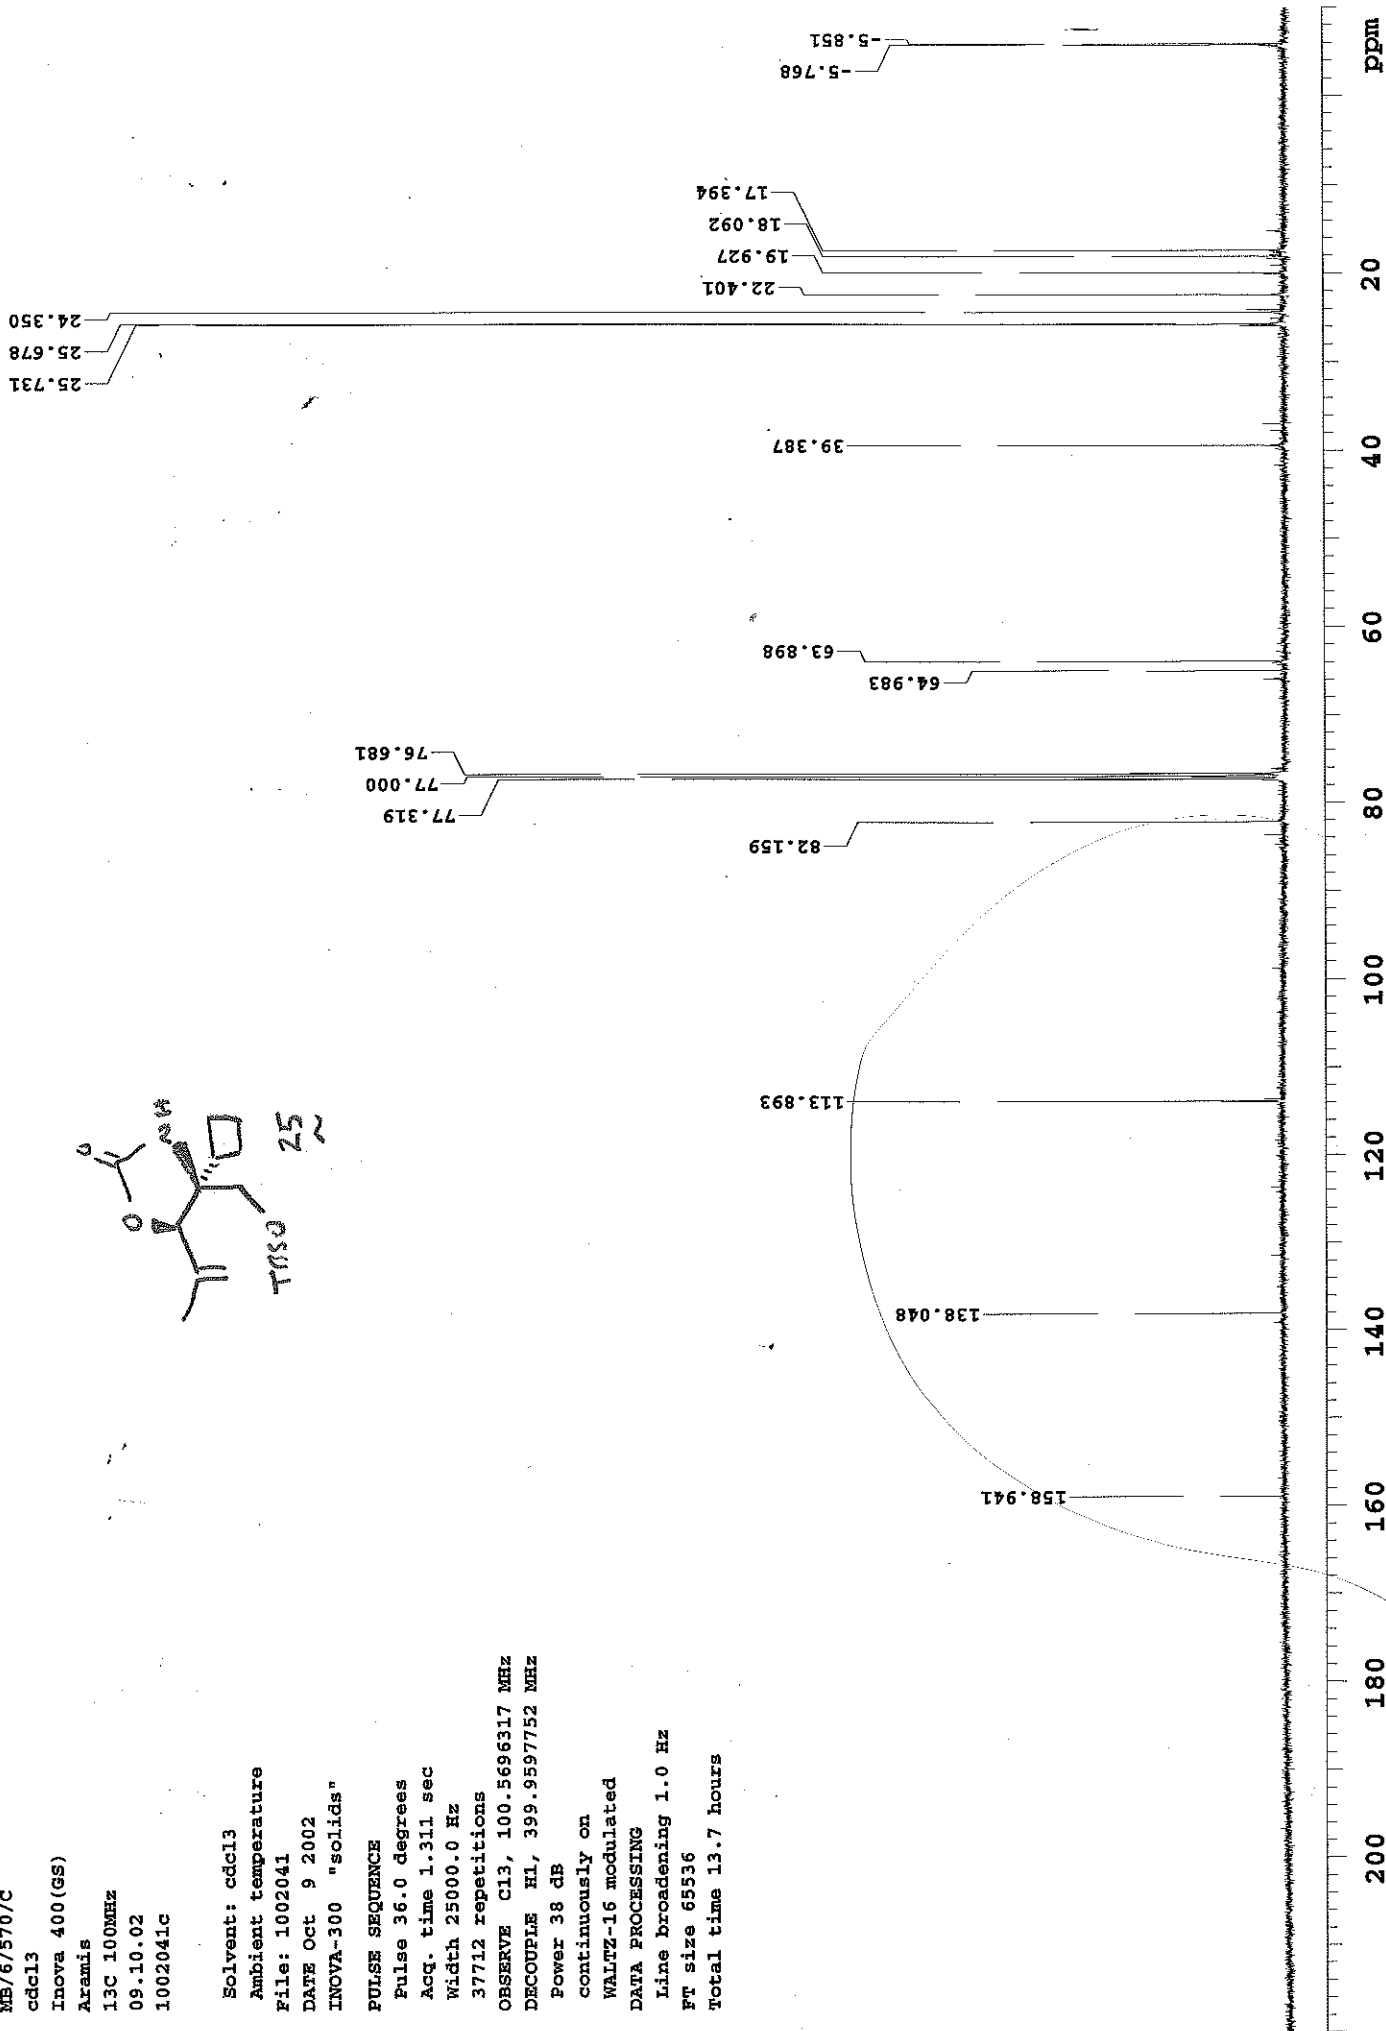

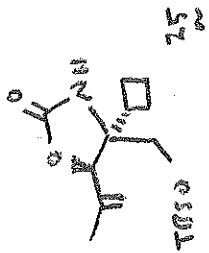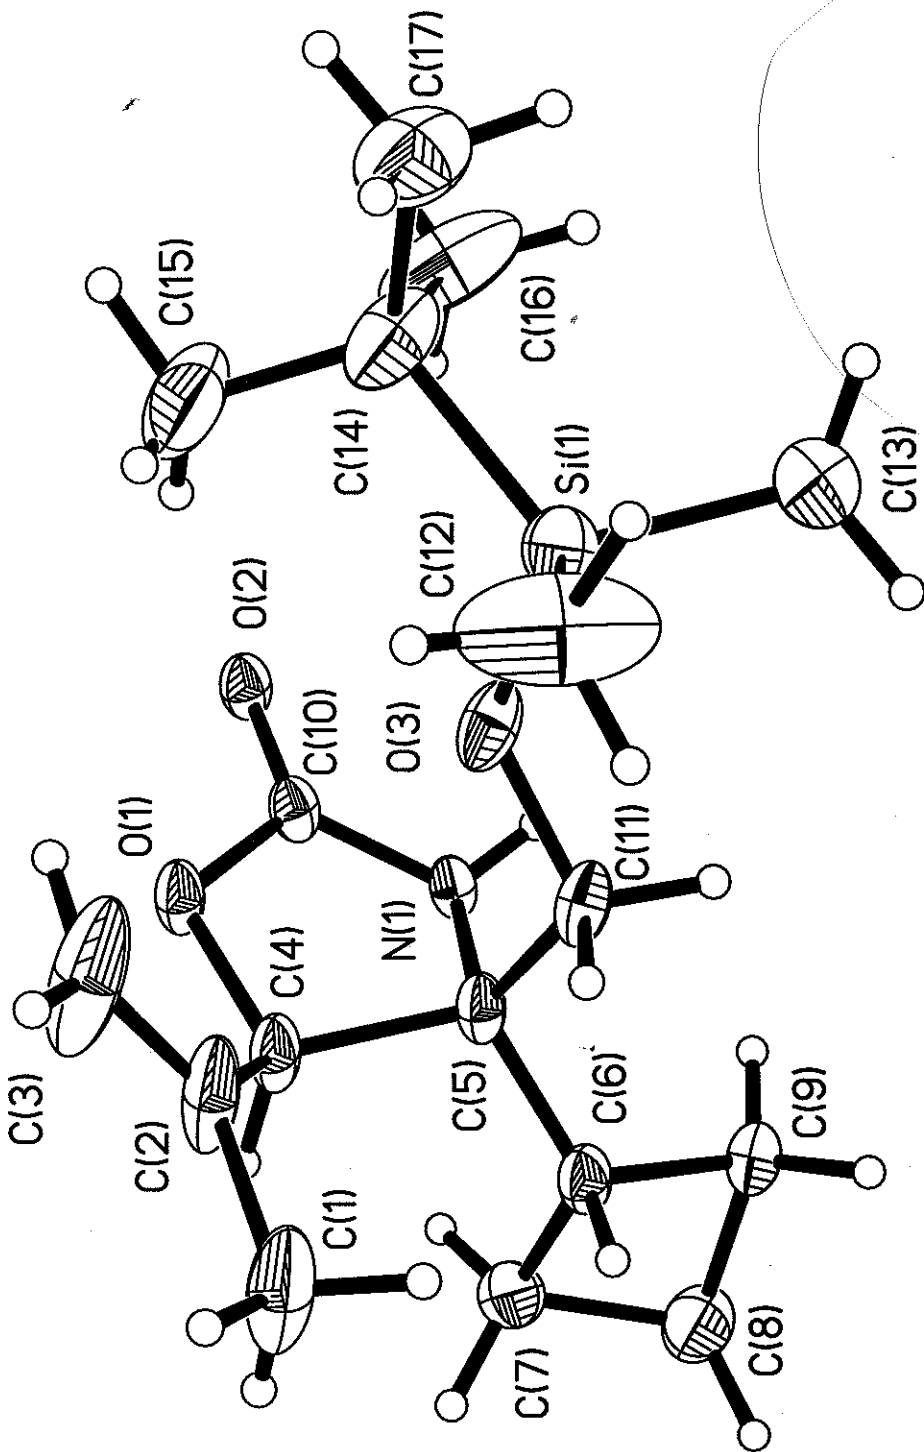

Maxime BUFFAT  
MB/6/594/C  
cdcl3  
Inova 400 (MB)  
Aramis  
Proton 400MHZ  
02.11.02

Pulse Sequence: s2pul

Solvent: cdcl3  
Ambient temperature  
User: 1-12-87  
INOVA-400 "aramis"

Relax. delay 5.000 sec  
Pulse 36.0 degrees  
Acq. time 4.008 sec  
Width 6387.7 Hz  
96 repetitions  
OBSERVE H1, 399.9584369 MHz  
DATA PROCESSING  
Line broadening 0.2 Hz  
FT size 65536  
Total time 14 min, 25 sec

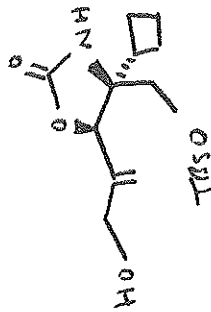

31

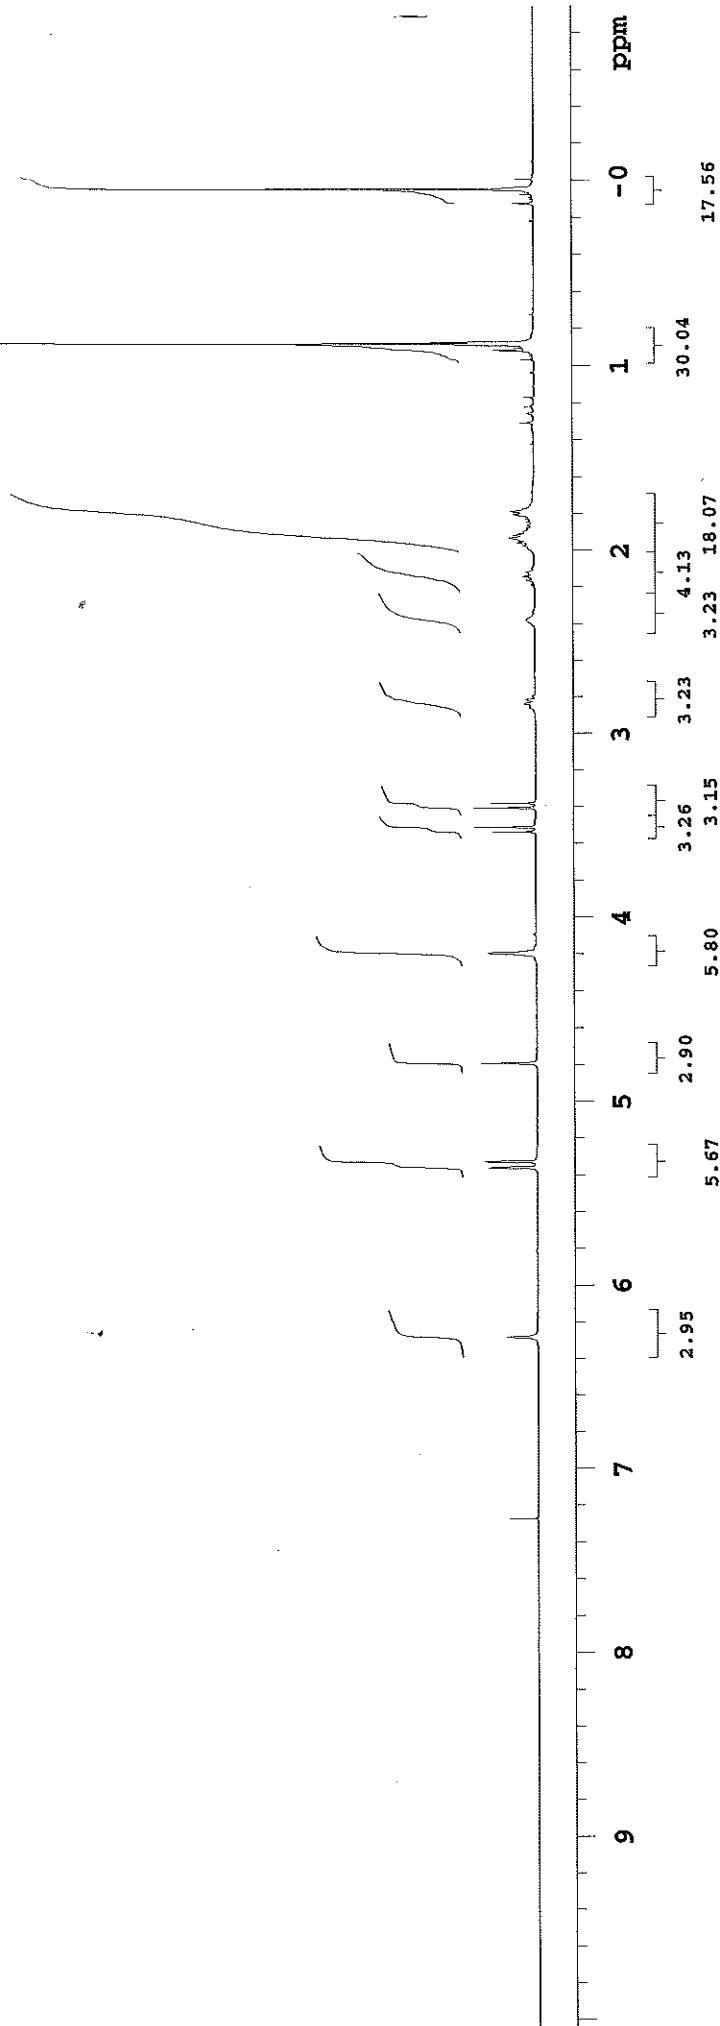

Maxime BUFFAT  
 MB/6/594/C  
 cdc13  
 Inova 400(mb)  
 Aramis  
 13C 100MHz  
 02.11.02

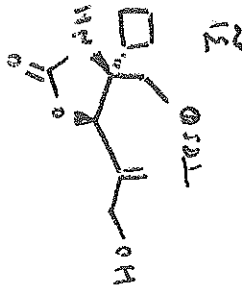

Pulse Sequence: s2pul

Solvent: cdc13  
 Ambient temperature  
 File: MB.6.594.C-400C-02.11.02  
 INOVA-400 "aramis"

Pulse 36.0 degrees  
 Acq. time 1.311 sec  
 Width 25000.0 Hz  
 1282 repetitions  
 OBSERVE C13, 100.5696317 MHz  
 DECOUPLE H1, 399.9597752 MHz  
 Power 38 dB  
 continuously on  
 WALTZ-16 modulated  
 DATA PROCESSING  
 Line broadening 1.0 Hz  
 Ft size 65536  
 Total time 366 hr, 32 min, 34 sec

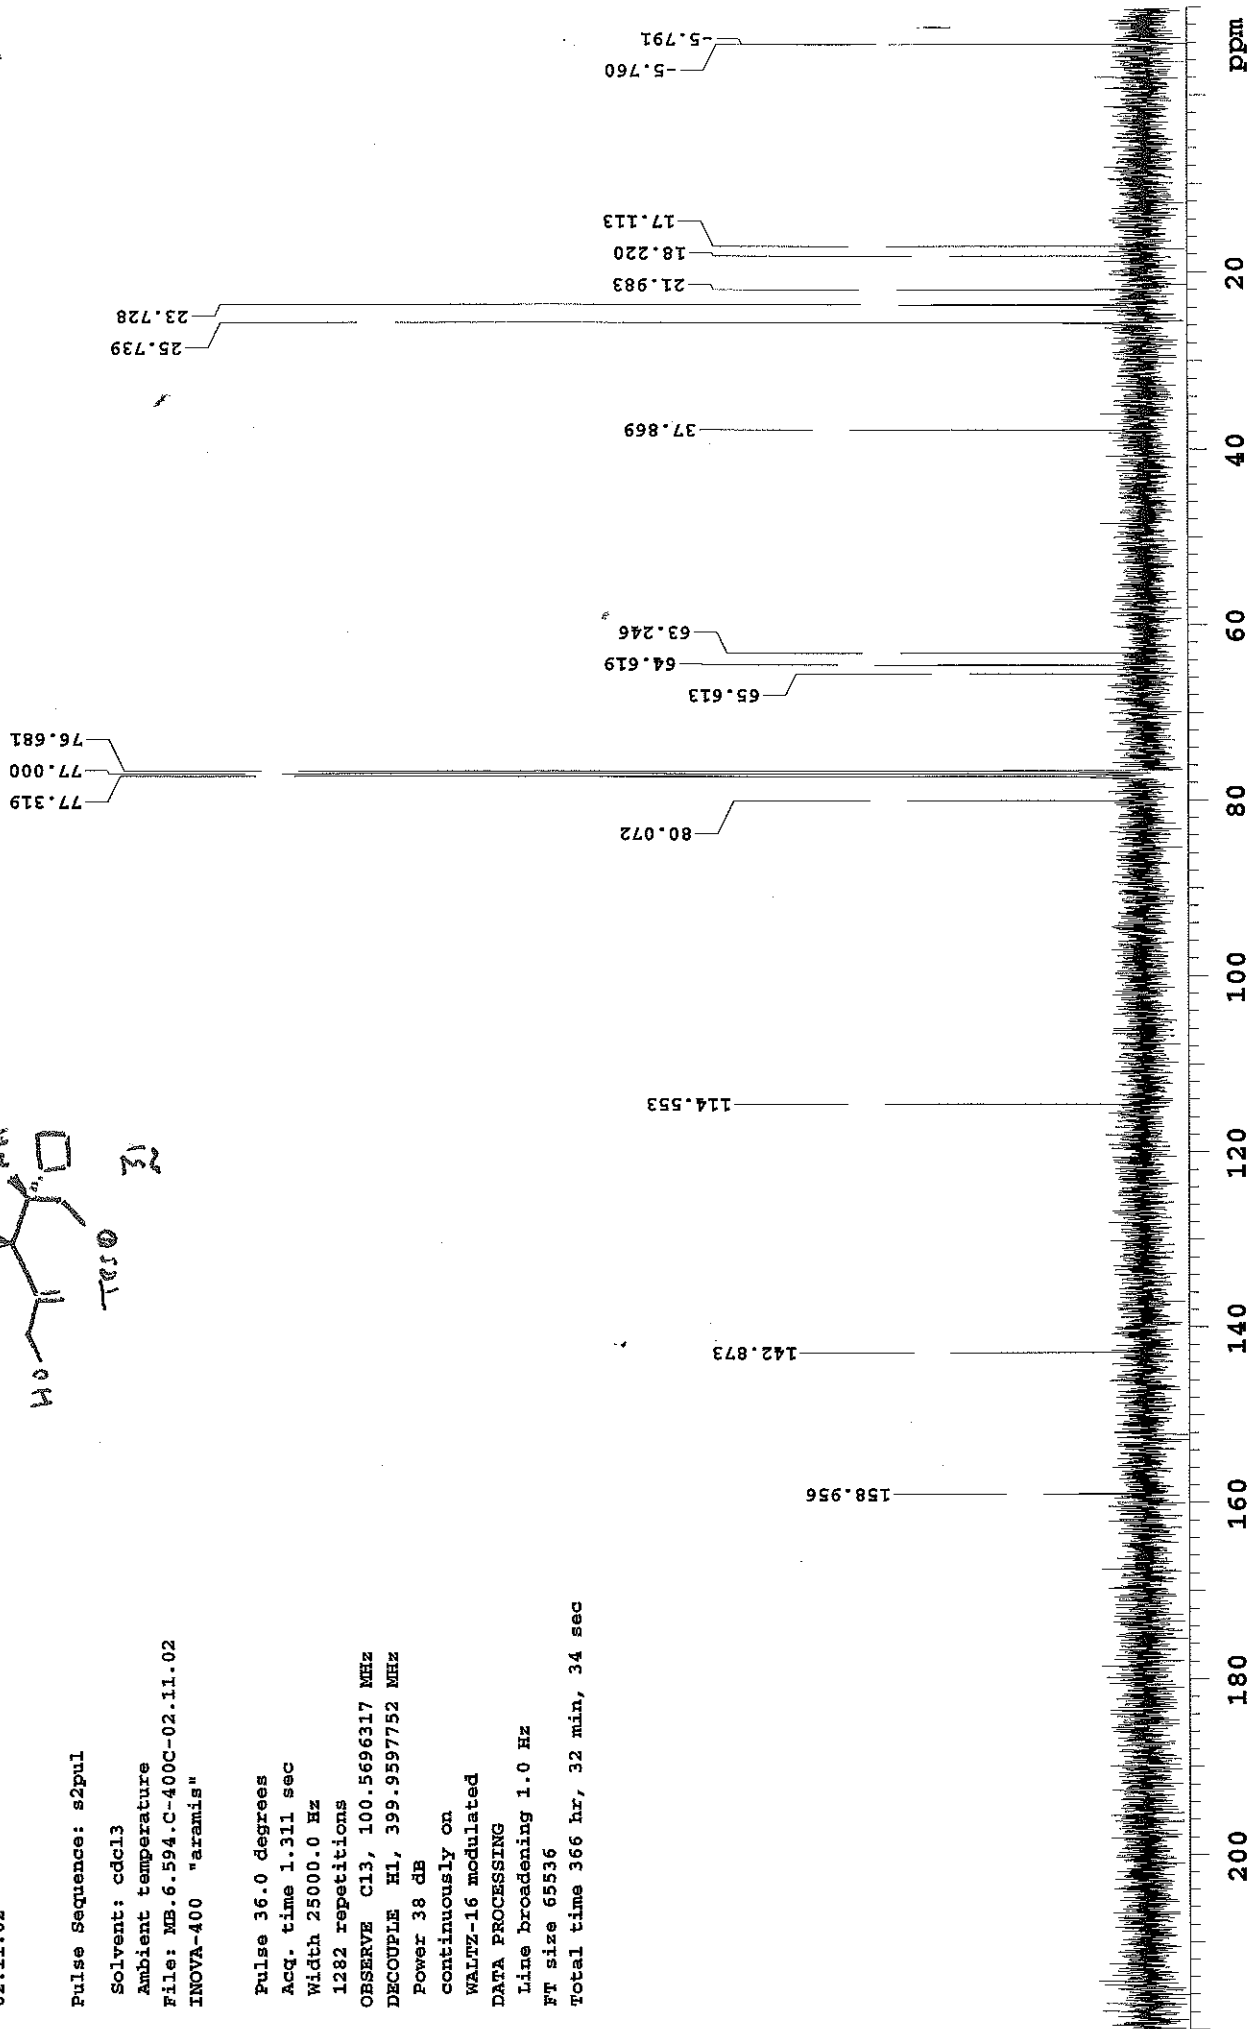

MAXIME BUFFAT  
 MB76/598/C  
 cdc13  
 Inova 400 (mb)  
 Aramis  
 Proton 400MHz  
 03.11.02

Pulse Sequence: s2pul  
 Solvent: cdcl3  
 Ambient temperature  
 User: 1-12-87  
 INOVA-400 "aramis"

Relax. delay 5.000 sec  
 Pulse 36.0 degrees  
 Acq. time 4.008 sec  
 Width 6387.7 Hz  
 96 repetitions  
 OBSERVE HL, 399.9584369 MHZ  
 DATA PROCESSING  
 Line broadening 0.2 Hz  
 FT size 65536  
 Total time 14 min, 25 sec

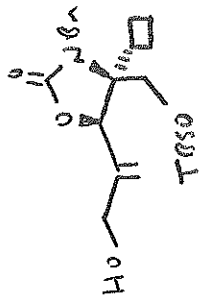

32

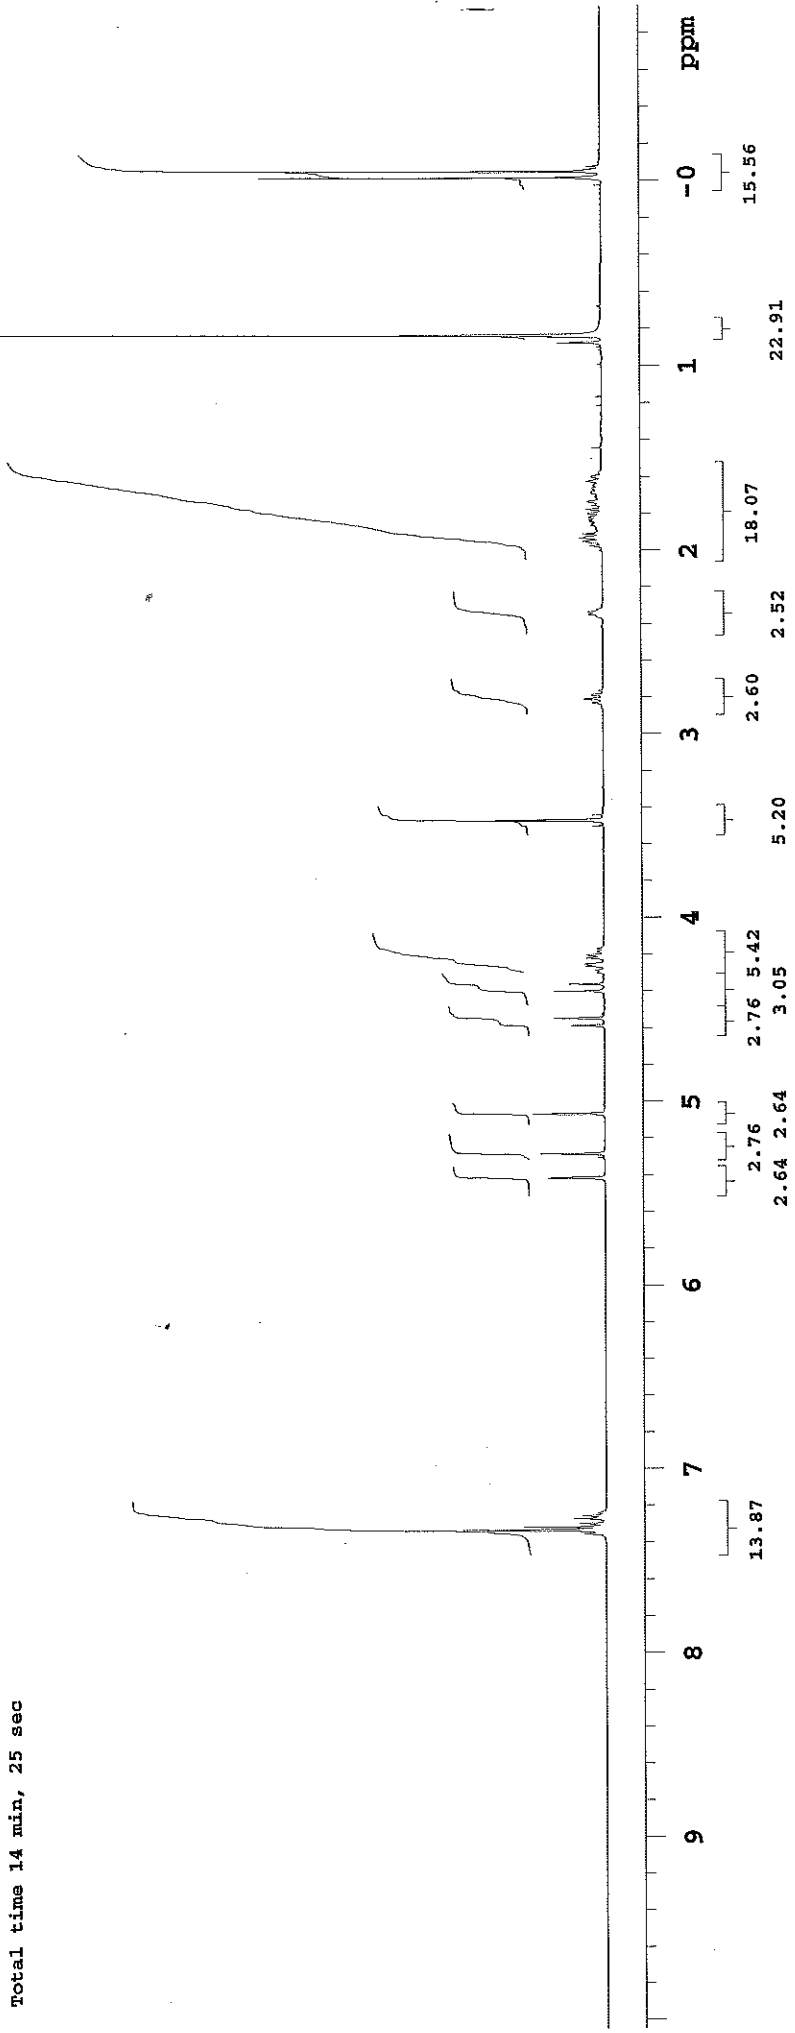

Maxime BUFFAT  
 MB/6/598/C  
 cdcl3  
 Inova 400 (mb)  
 Aramis  
 13C 100MHZ  
 03.11.02

Pulse Sequence: s2pul  
 Solvent: cdcl3  
 Ambient temperature  
 INOVA-400 "aramis"

Pulse 36.0 degrees  
 Acq. time 1.311 sec  
 Width 25000.0 Hz  
 4544 repetitions  
 OBSERVE C13, 100.5696332 MHz  
 DECOUPLE H1, 399.9597752 MHz  
 Power 38 dB  
 continuously on  
 WALTZ-16 modulated  
 DATA PROCESSING  
 Line broadening 1.0 Hz  
 Ft size 65536  
 Total time 36 hr, 39 min, 15 sec

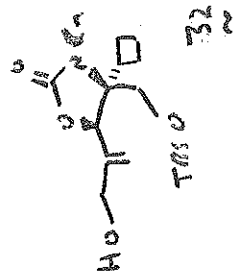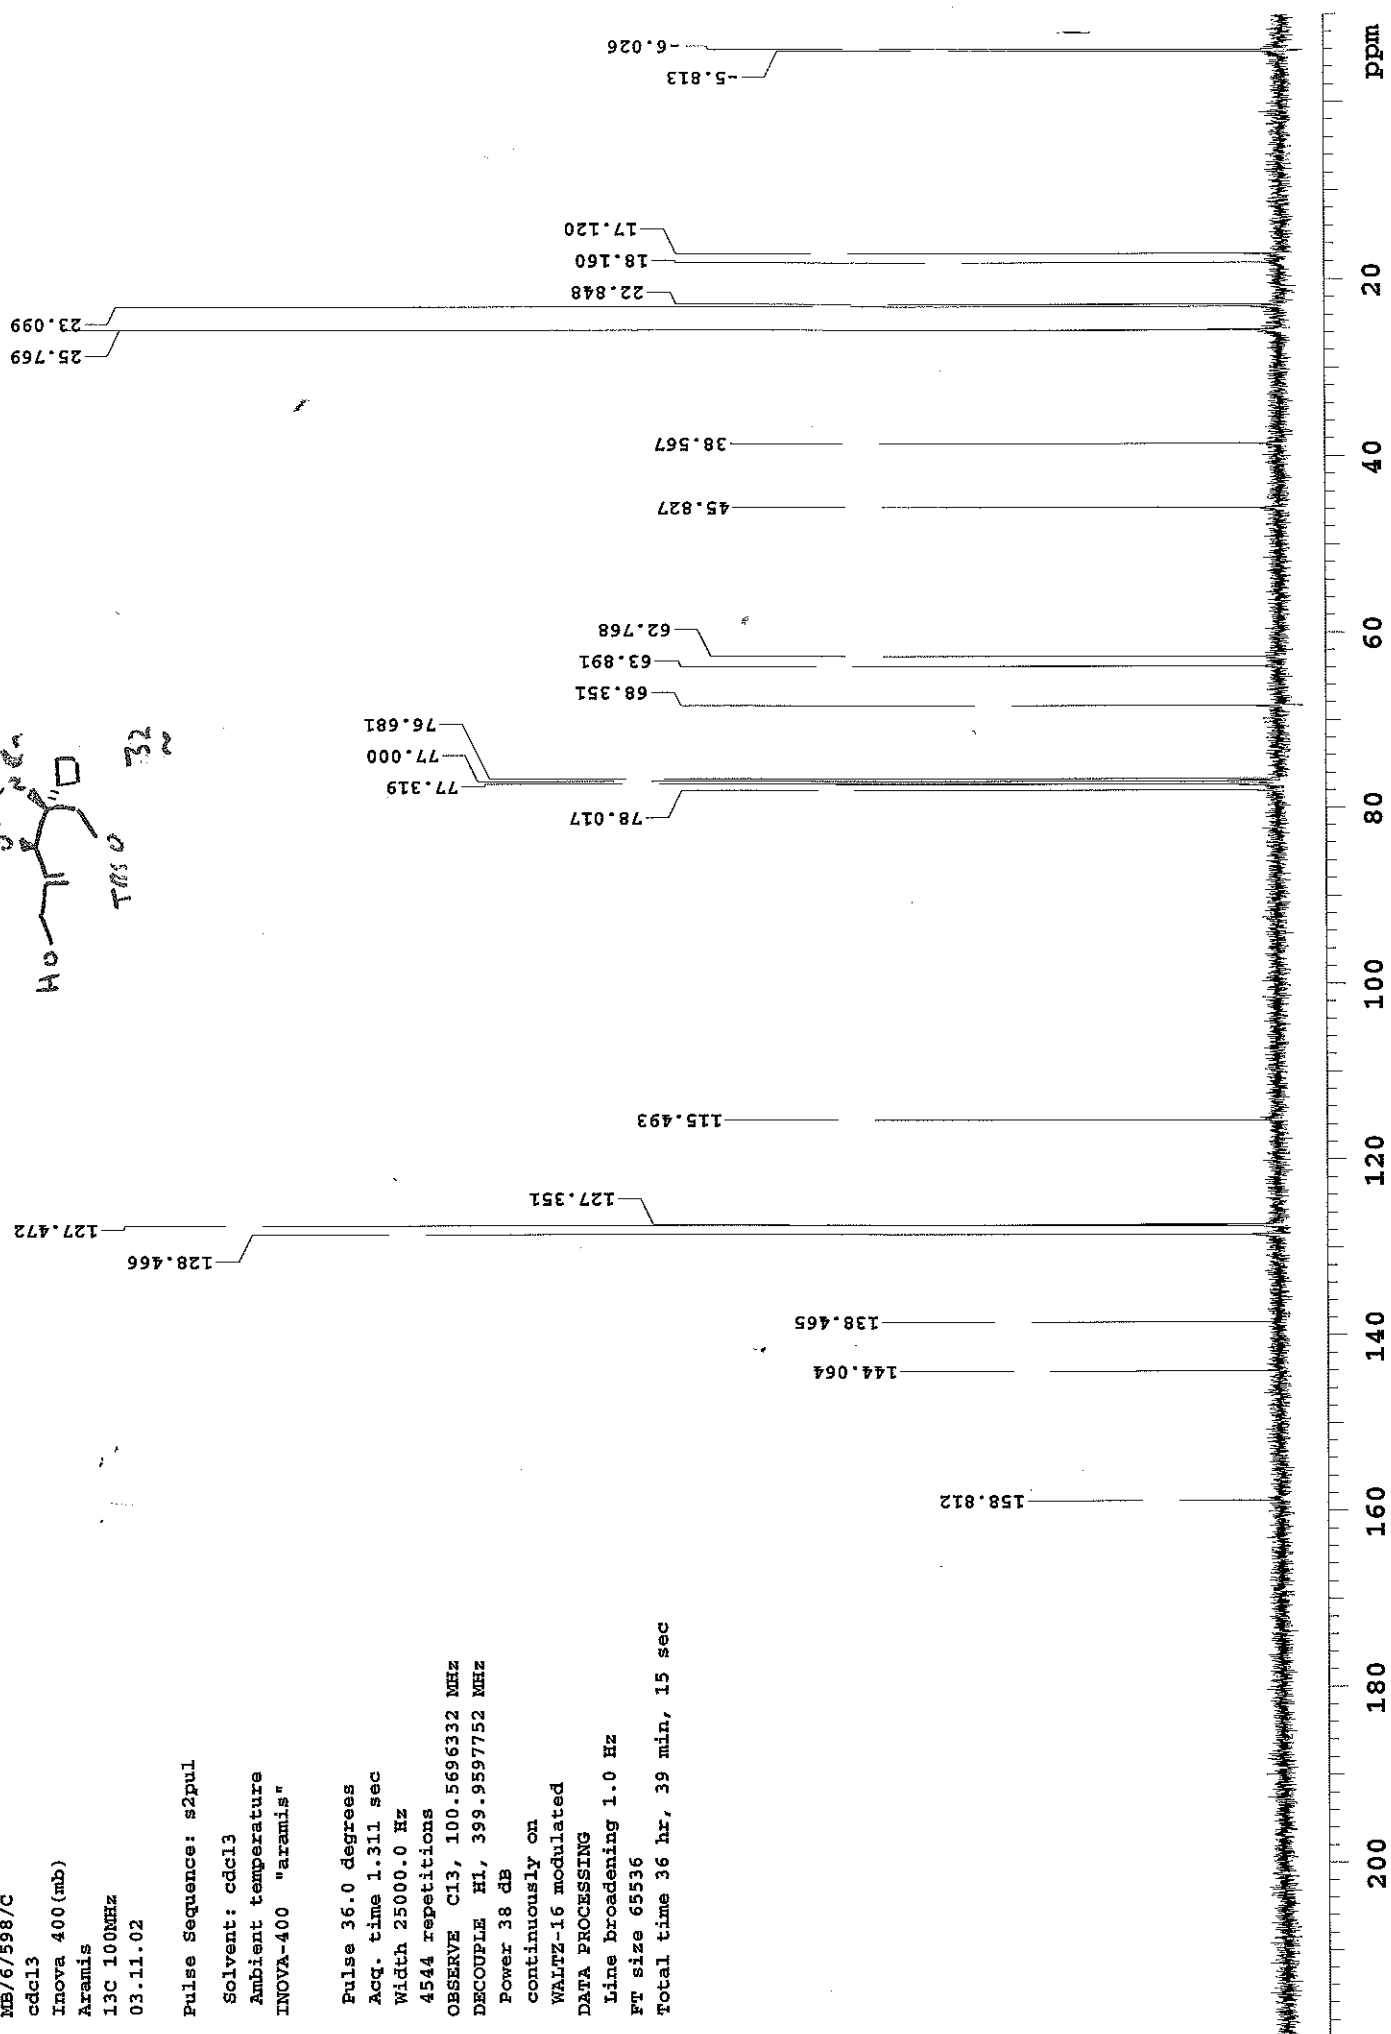



Maxime BUFFAT  
MB/6/599/A  
cdcl3  
Inova 400(mb)  
Aramis  
Proton 400MHz  
03.11.02

Pulse Sequence: s2pul  
Solvent: cdcl3  
Ambient temperature  
User: 1-12-87  
INOVA-400 "aramis"

Relax. delay 5.000 sec  
Pulse 36.0 degrees  
Acq. time 4.008 sec  
Width 6387.7 Hz  
96 repetitions  
OBSERVE H1, 399.9584369 MHz  
DATA PROCESSING  
Line broadening 0.2 Hz  
FT size 65536  
Total time 14 min, 25 sec

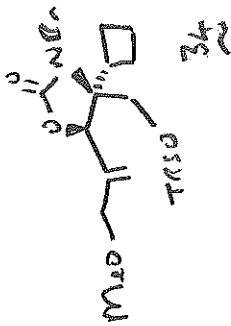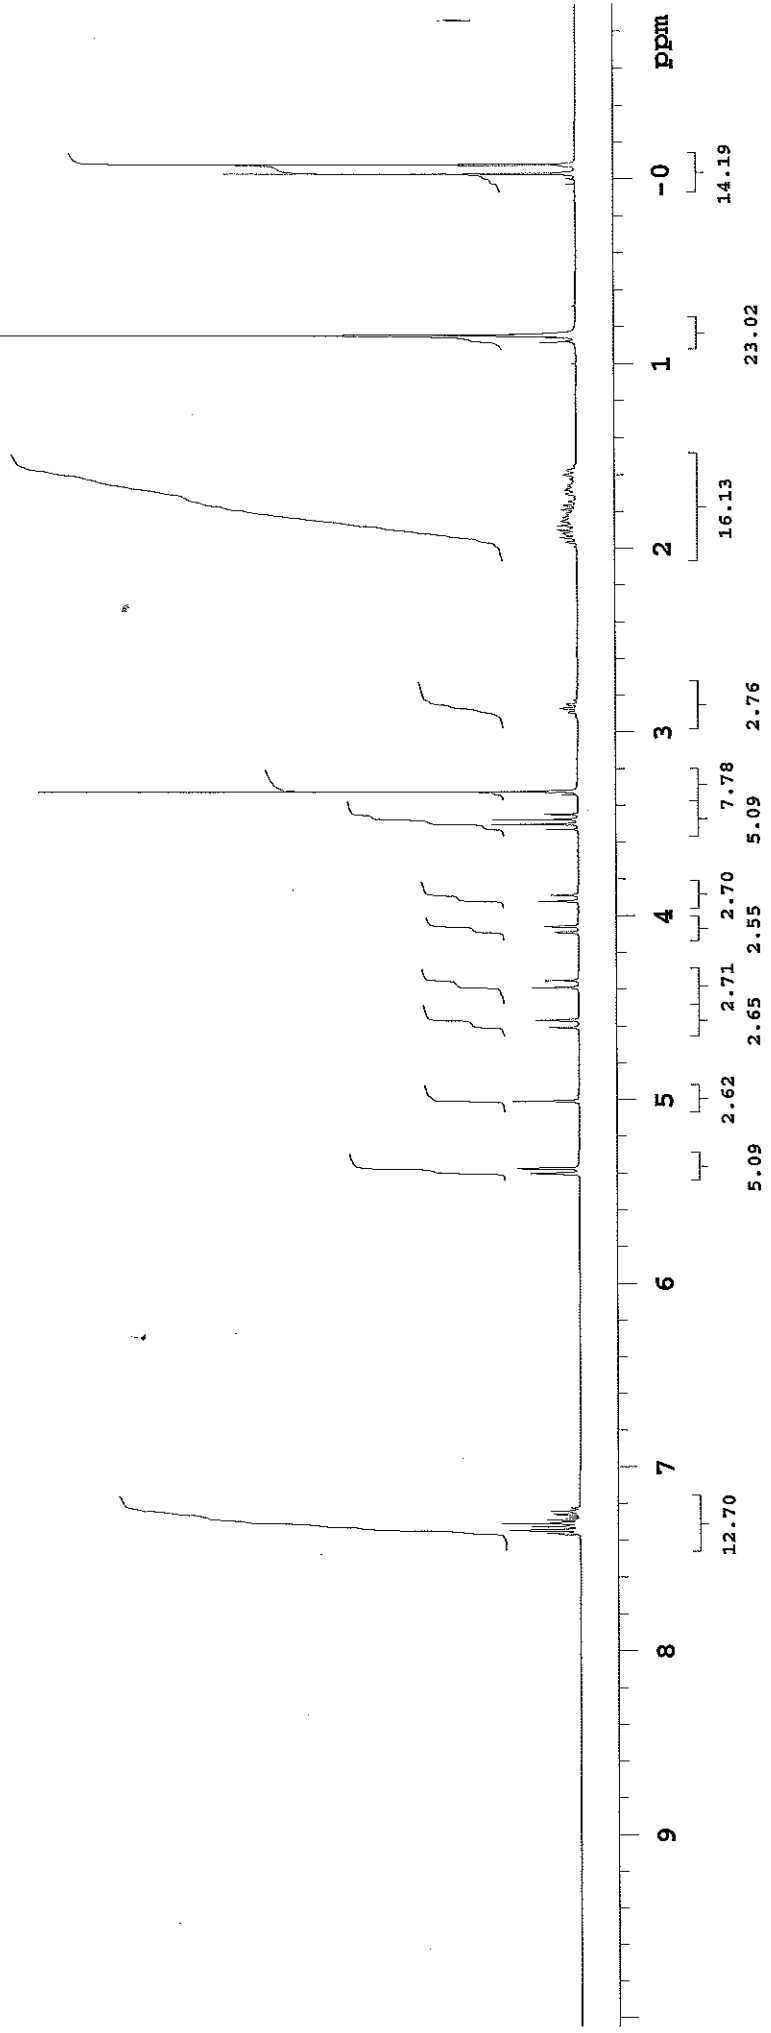

Maxime BUFFAT  
 MB/6/599/A  
 cdcl3  
 Inova 400 (mb)  
 Aramis  
 13C 100MHZ  
 03.11.02

Pulse Sequence: s2pul

Solvent: cdcl3  
 Ambient temperature  
 INOVA-400 "aramis"

Pulse 36.0 degrees  
 Acq. time 1.311 sec  
 Width 25000.0 Hz  
 8175 repetitions  
 OBSERVE C13, 100.5696340 MHz  
 DECOUPLE H1, 399.9597752 MHz  
 Power 38 dB  
 continuously on  
 WALTZ-16 modulated  
 DATA PROCESSING  
 Line broadening 1.0 Hz  
 Ft size 65536  
 Total time 36 hr, 39 min, 15 sec

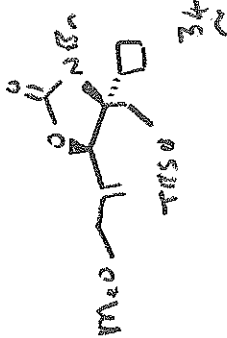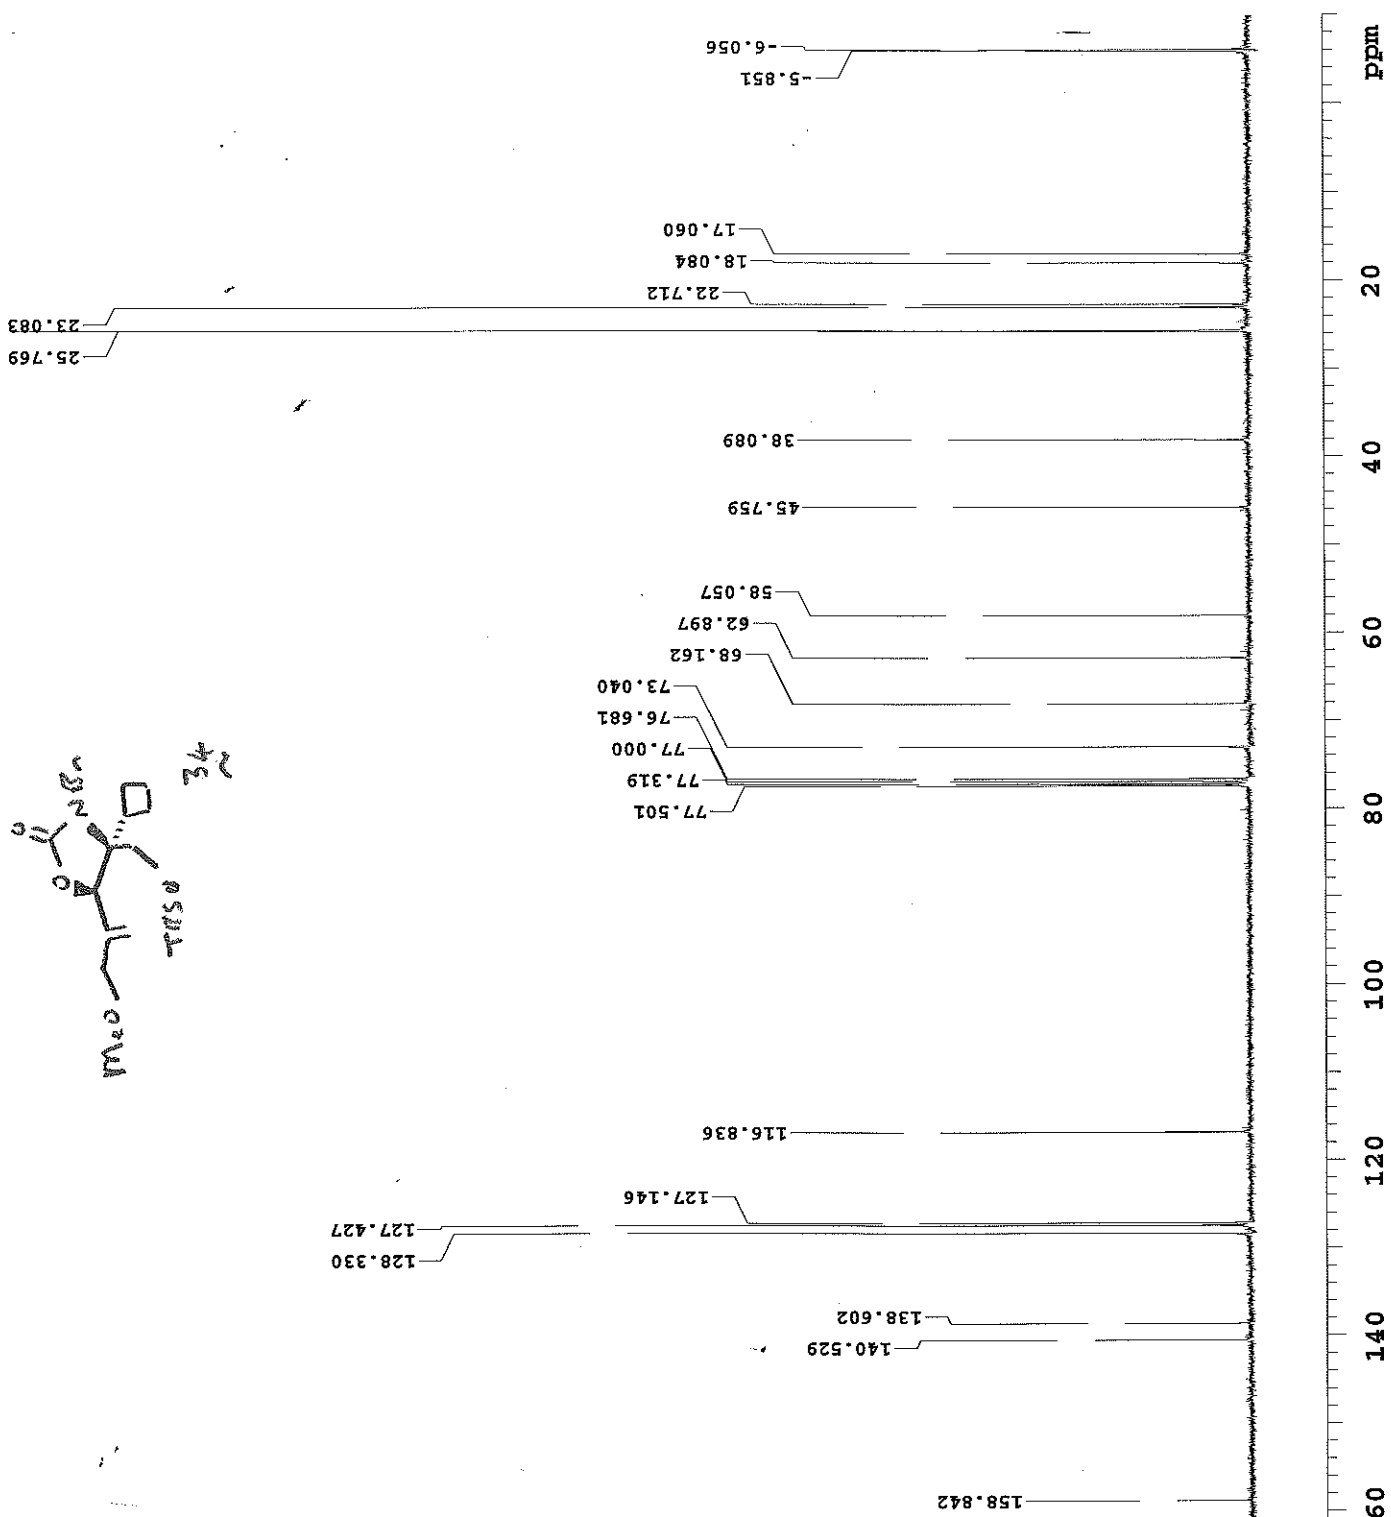

Maxime BUFFAT  
 MB/6/595/AB  
 cdcl3  
 Inova 400 (MB)  
 Aramis  
 Proton 400MHZ  
 02.11.02

Solvent: cdcl3  
 Ambient temperature  
 User: 1-12-87  
 File: MB.6.595.AB-400H-02.11.02  
 DATE Nov 2 2002  
 INOVA-300 "solids"

PULSE SEQUENCE

Relax. delay 5.000 sec  
 Pulse 36.0 degrees  
 Acq. time 4.008 sec  
 Width 6387.7 Hz  
 96 repetitions  
 OBSERVE H1, 399.9584369 MHz  
 DATA PROCESSING  
 Line broadening 0.2 Hz  
 FT size 65536  
 Total time 14 minutes

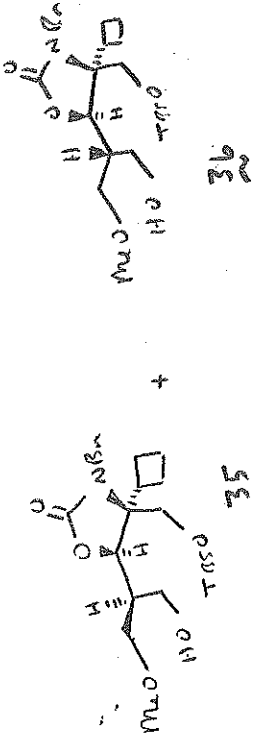

85:15

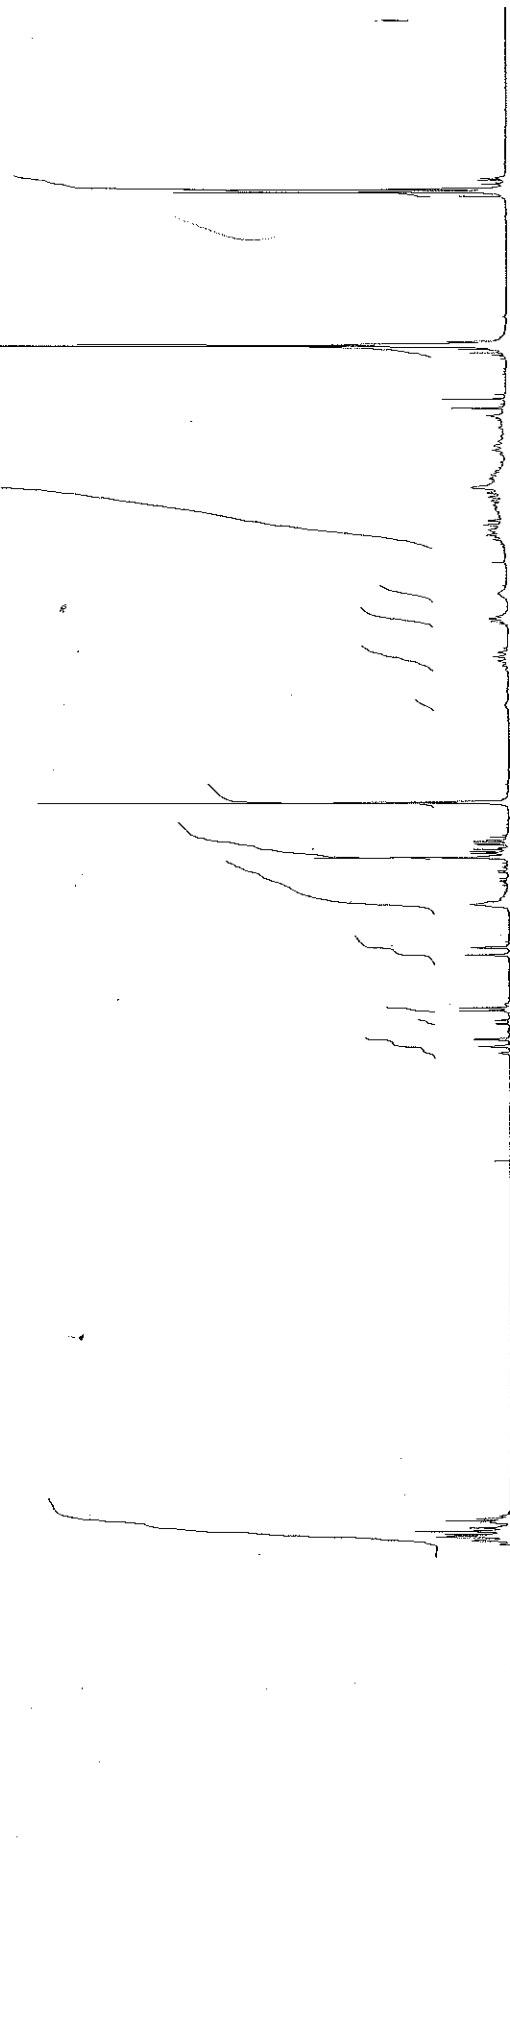

| ppm   | Integration |
|-------|-------------|
| 11.29 | 11.29       |
| 7.42  | 7.42        |
| 6.56  | 6.56        |
| 6.05  | 6.05        |
| 2.32  | 2.32        |
| 2.08  | 2.08        |
| 2.10  | 2.10        |
| 2.28  | 2.28        |
| 2.89  | 2.89        |
| 0.54  | 0.54        |
| 0.51  | 0.51        |
| 21.00 | 21.00       |
| 12.18 | 12.18       |

Maxime BUFFAT  
MB/6/595/AB  
cdc13  
Inova 400 (mb)  
Aramis  
13C 100MHZ  
02.11.02

Pulse Sequence: s2pul

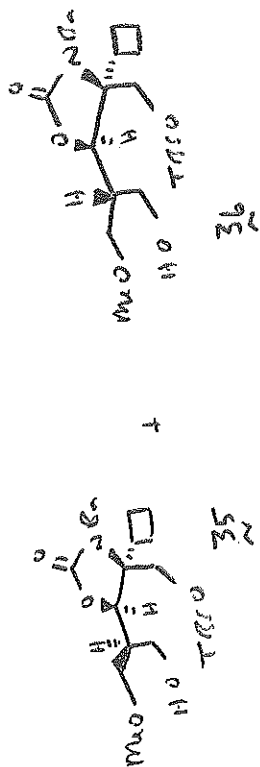

+

85.15

-5.874  
-5.828  
-5.791

-2 -3 -4 -5 -6 -7 -8 ppm

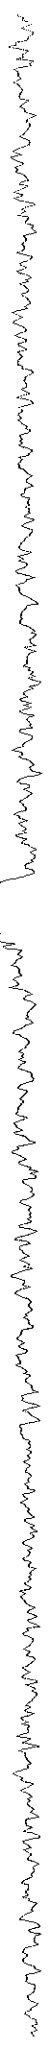

35 + 36

Maxime BUFFAT  
MB/6/595/AB  
cdcl3  
Inova 400 (mb)  
Aramis  
13C 100MHZ  
02.11.02

Pulse Sequence: s2pul

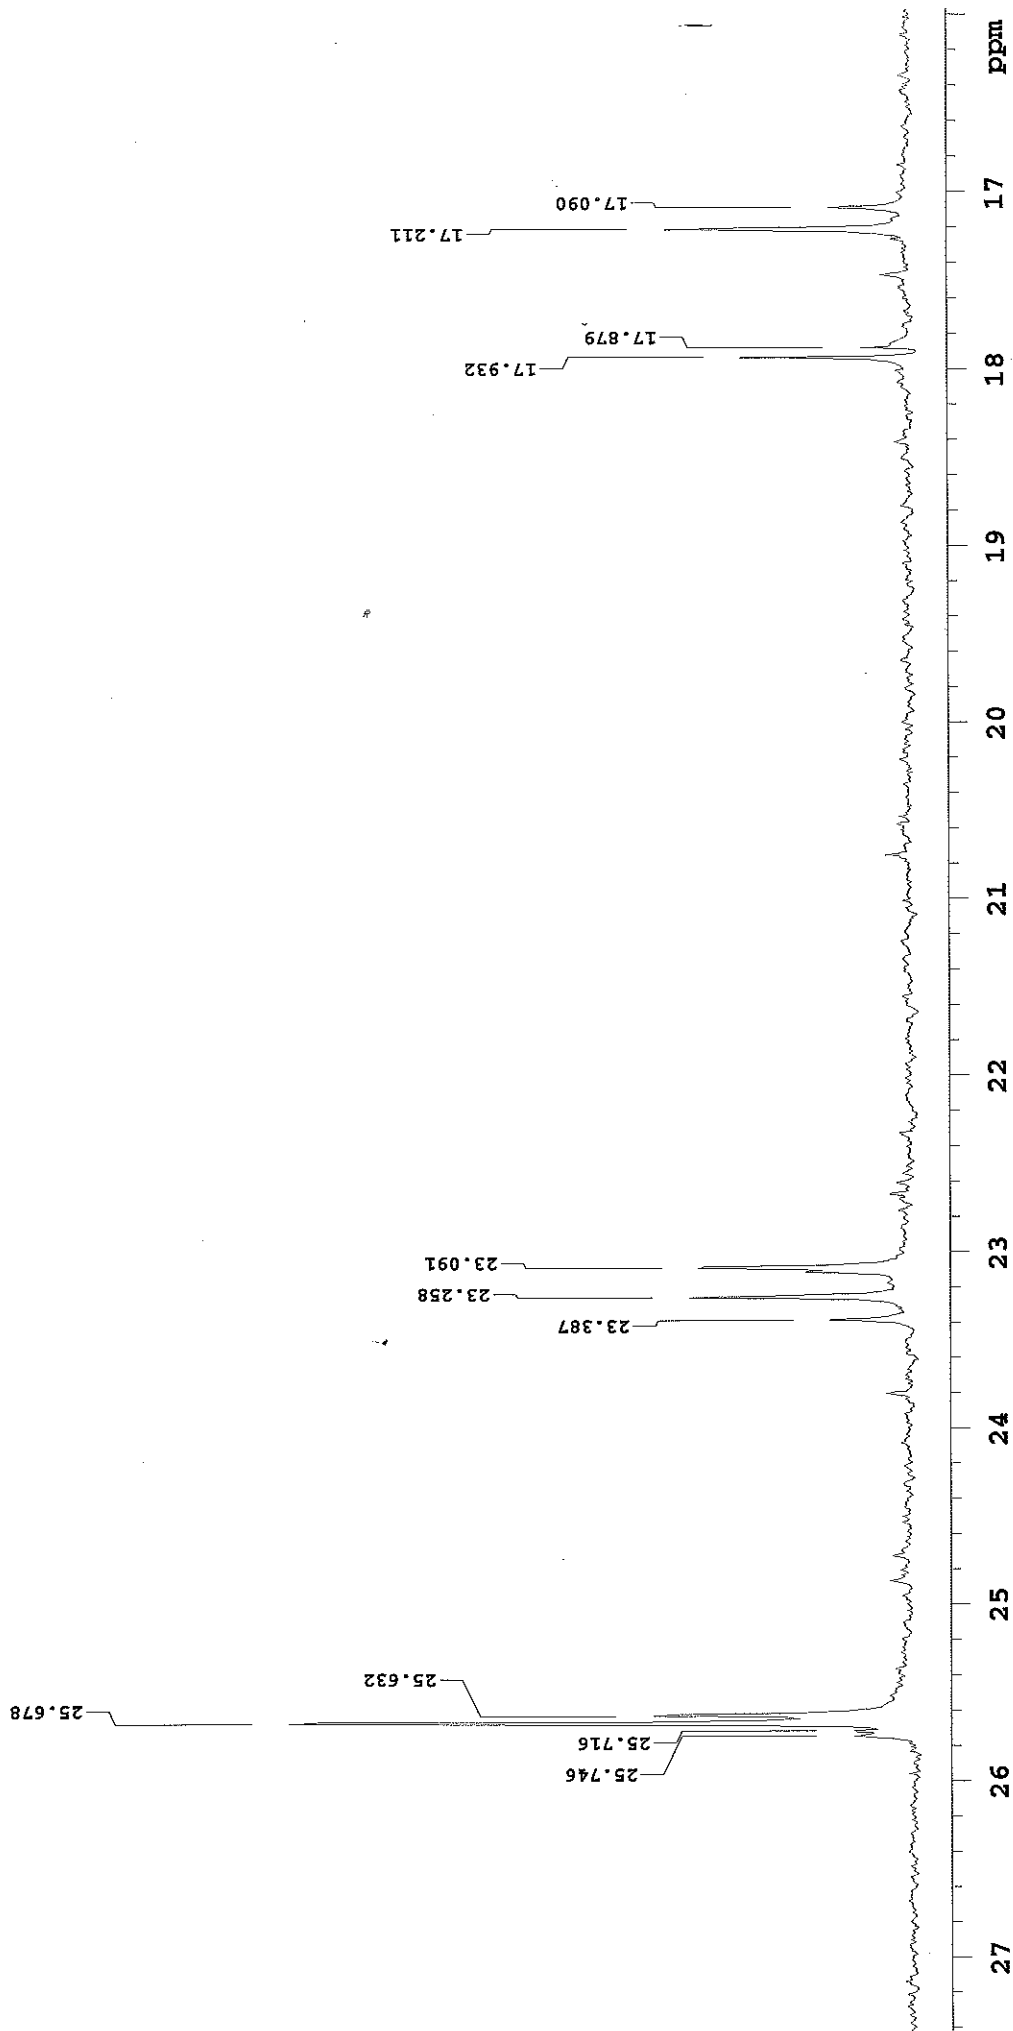

35 + 36  
~

Maxime BUFFAT  
MB/6/595/AB  
cdcl3  
Inova 400 (mb)  
Aramis  
13C 100MHZ  
02.11.02

Pulse Sequence: s2pul

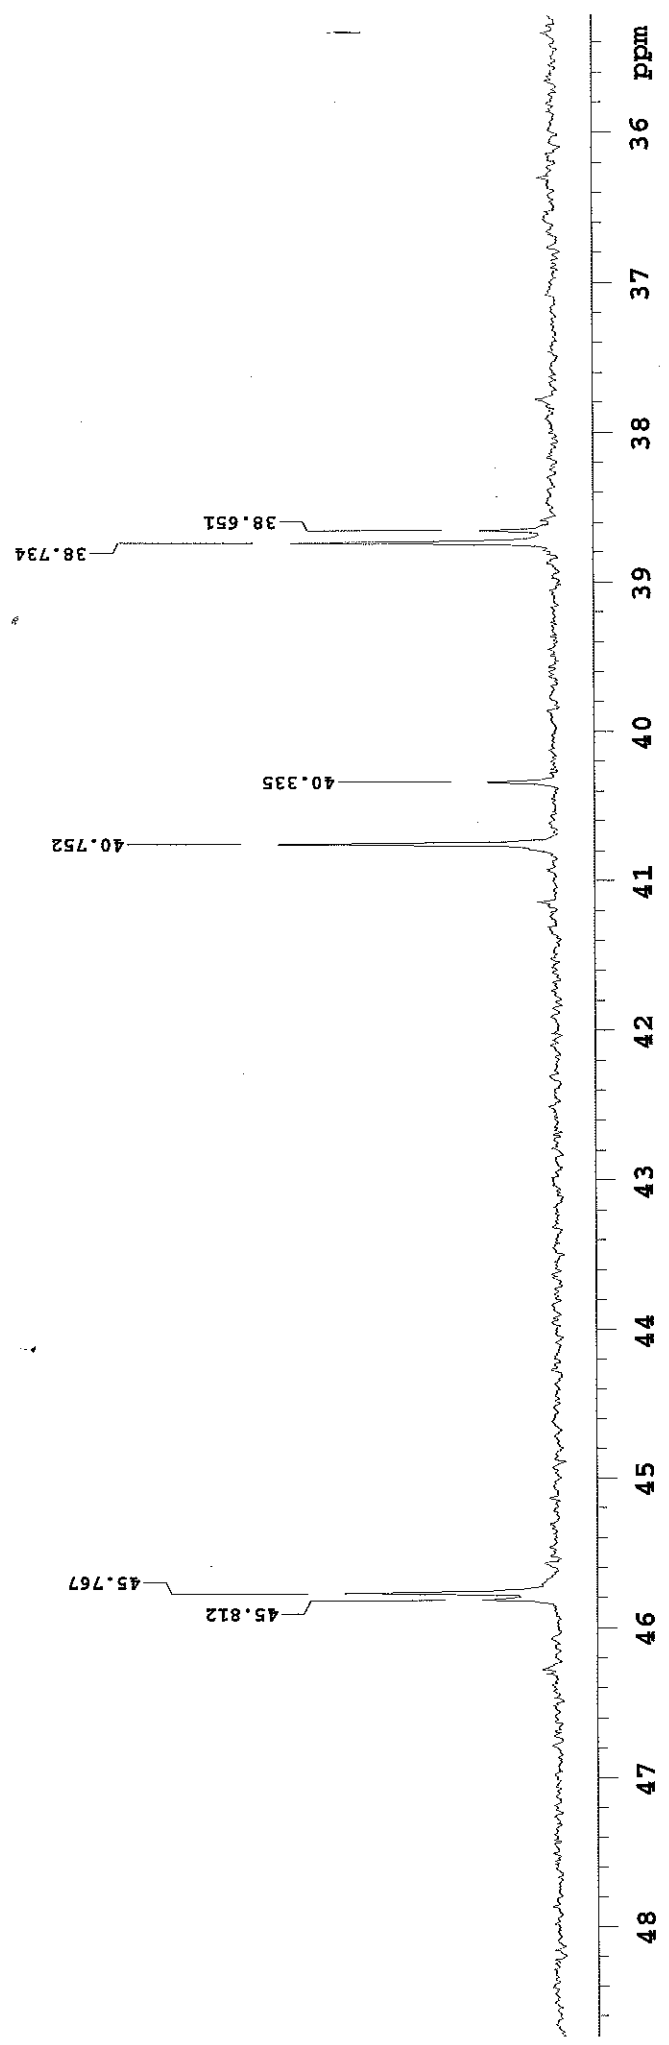

Maxime BUFFAT  
MB/6/595/AB  
cdcl3  
Inova 400 (mb)  
Aramis  
13C 100MHZ  
02.11.02

35 + 36

Pulse Sequence: s2pul

77.364

77.000

77.319

76.681

75.437

73.556

73.336

68.541

68.792

64.376

62.305

61.228

60.833

59.286

59.066

78 76 74 72 70 68 66 64 62 60 ppm

Maxime BUFFAT  
MB/6/595/AB  
cdcl3  
Inova 400 (mb)  
Aramis  
13C 100MHZ  
02.11.02

75 + 36

Pulse Sequence: s2pul

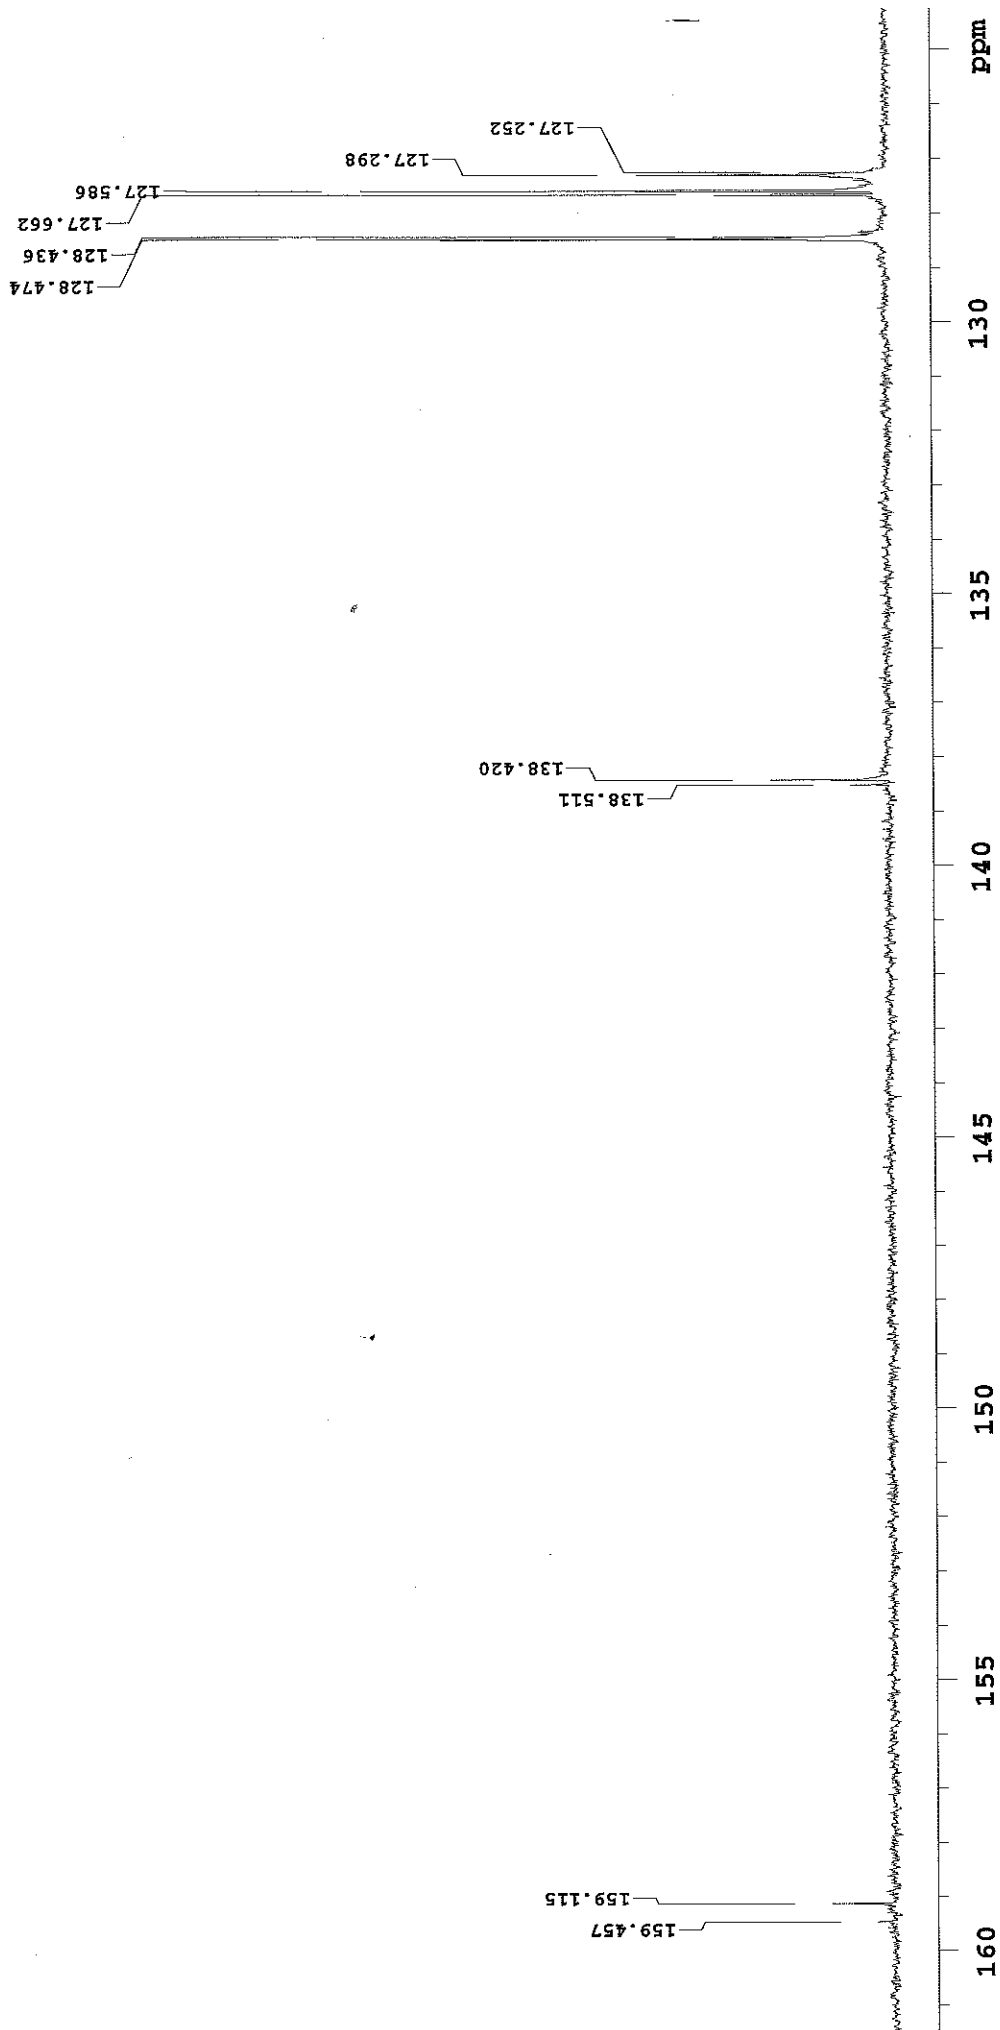



Maxime BUFFAT  
MB.7.610.AB  
cdcl3  
Inova 400 (MB)  
Aramis  
Proton 400MHz  
23.11.02

Pulse Sequence: s2pul  
Solvent: cdcl3  
Ambient temperature  
User: 1-12-87  
INOVA-400 "aramis"

Relax. delay 5.000 sec  
Pulse 36.0 degrees  
Acq. time 4.008 sec  
Width 6387.7 Hz  
96 repetitions  
OBSERVE H1, 399.9584369 MHz  
DATA PROCESSING  
Line broadening 0.2 Hz  
Ft size 65536  
Total time 14 min, 25 sec

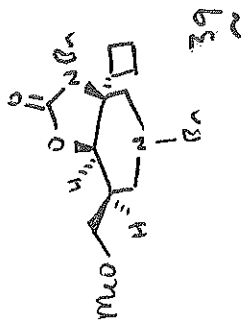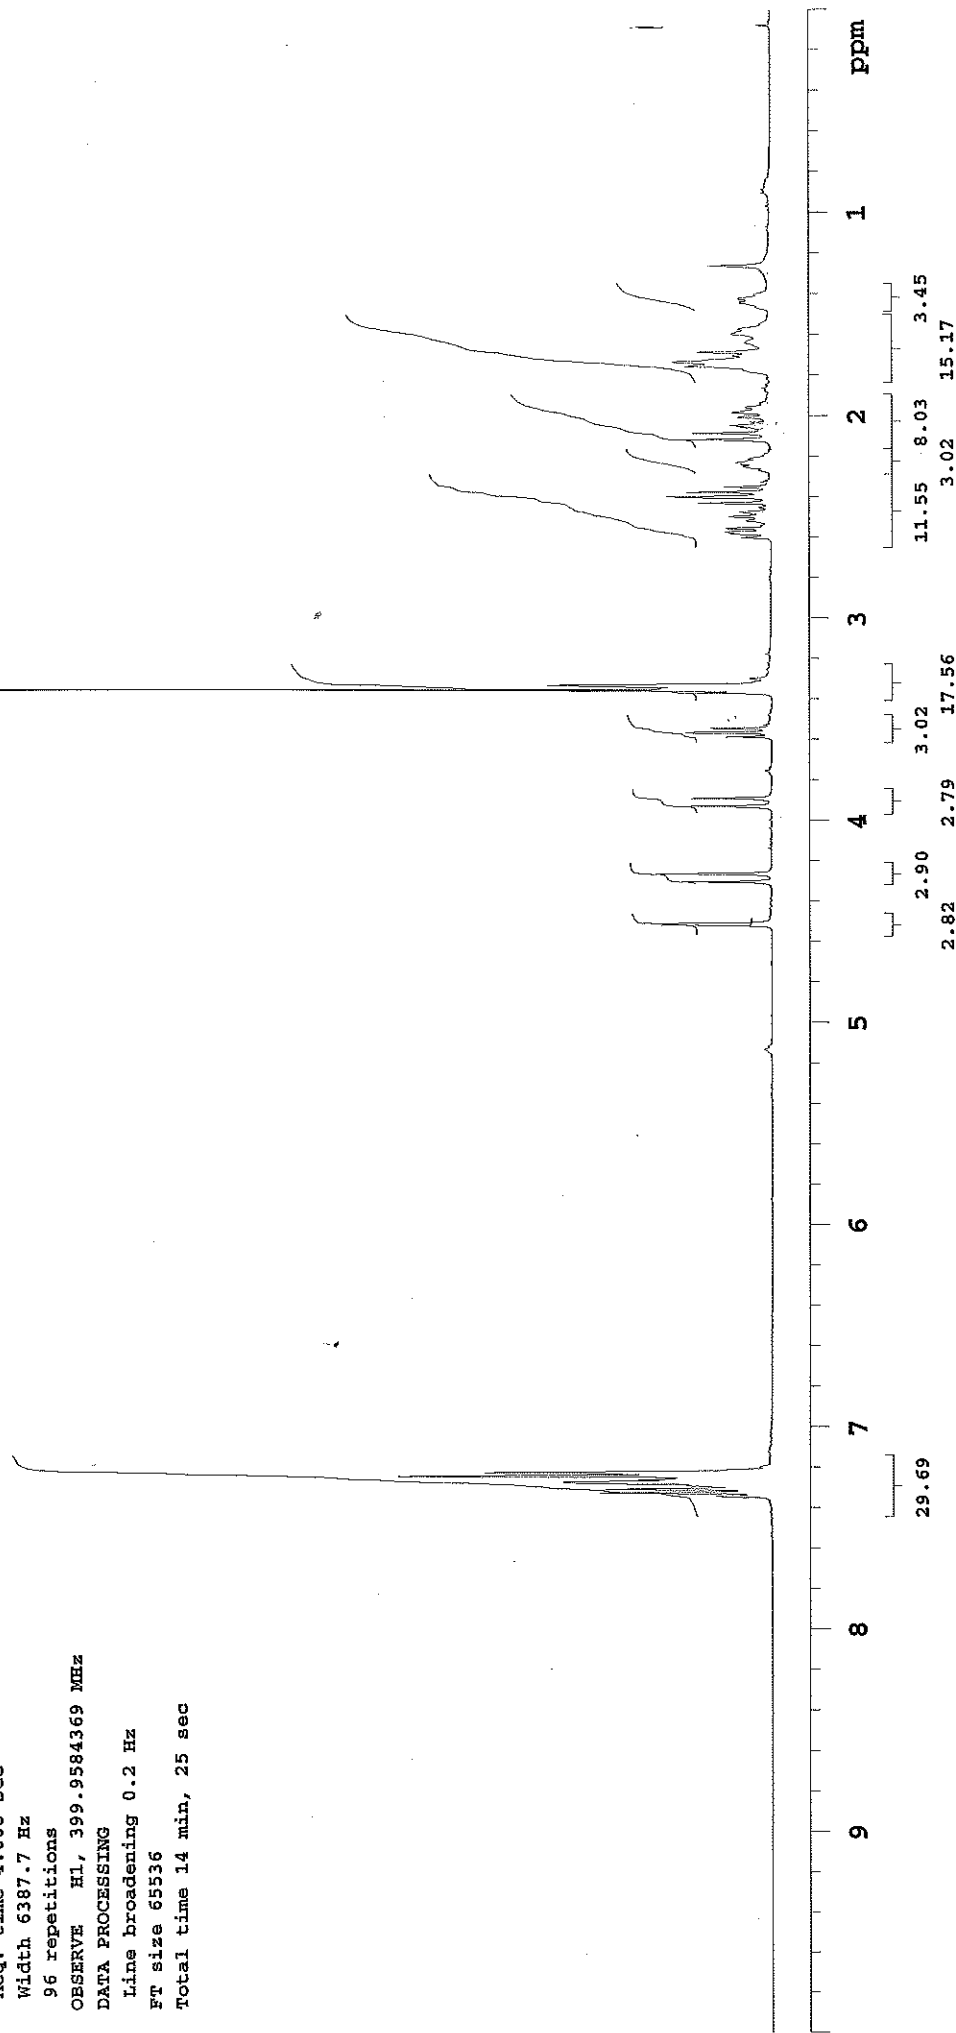

Maxime BUFFAT  
 MB/7/610/BA  
 cdcl3  
 Inova 400(mb)  
 Aramis  
 13C 100MHZ  
 23.11.02

Pulse Sequence: s2pul

Solvent: cdcl3  
 Ambient temperature  
 INOVA-400 "aramis"

Pulse 36.0 degrees  
 Acq. time 1.311 sec  
 Width 25000.0 Hz  
 5880 repetitions  
 OBSERVE C13, 100.5696317 MHz  
 DECOUPLE H1, 399.9597752 MHz  
 Power 38 dB  
 continuously on  
 WALTZ-16 modulated  
 DATA PROCESSING  
 Line broadening 1.0 Hz  
 Ft size 65536  
 Total time 3 hr, 39 min, 55 sec

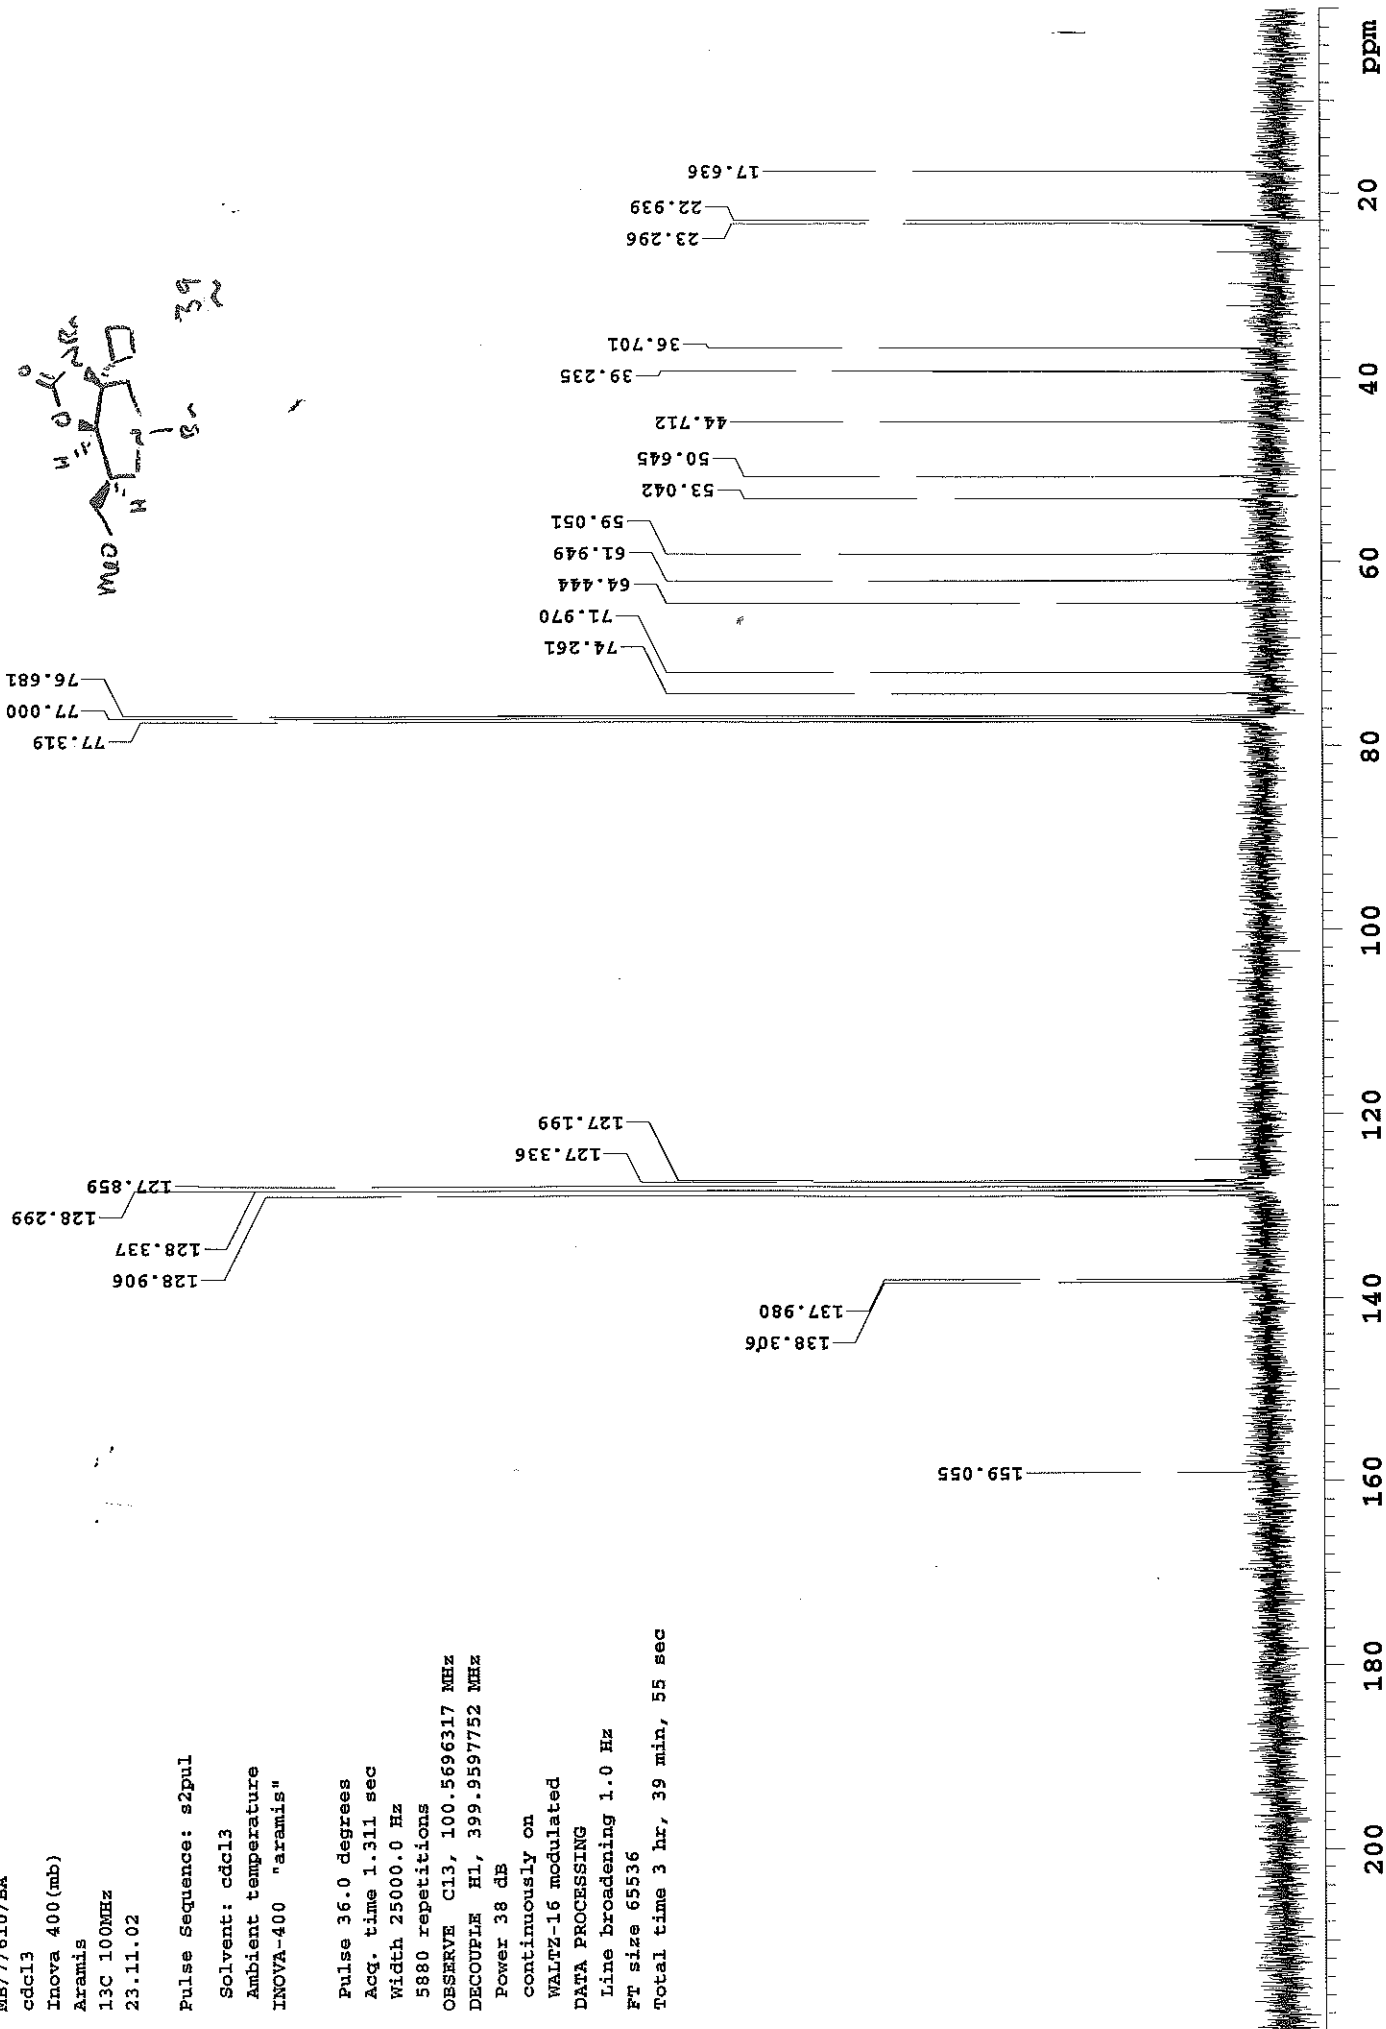

Maxime BUFFAT  
MB.7.621.B  
cdcl3  
Inova 400 (MB)  
Aramis  
Proton 400MHz  
29.11.02

Pulse Sequence: s2pul  
Solvent: cdcl3  
Ambient temperature  
User: 1-12-87  
INOVA-400 "aramis"

Relax. delay 5.000 sec  
Pulse 36.0 degrees  
Acq. time 4.008 sec  
Width 6387.7 Hz  
96 repetitions  
OBSERVE H1, 399.9584369 MHz  
DATA PROCESSING  
Line broadening 0.2 Hz  
Ft size 65536  
Total time 14 min, 25 sec

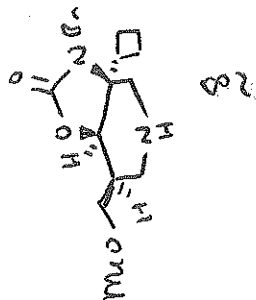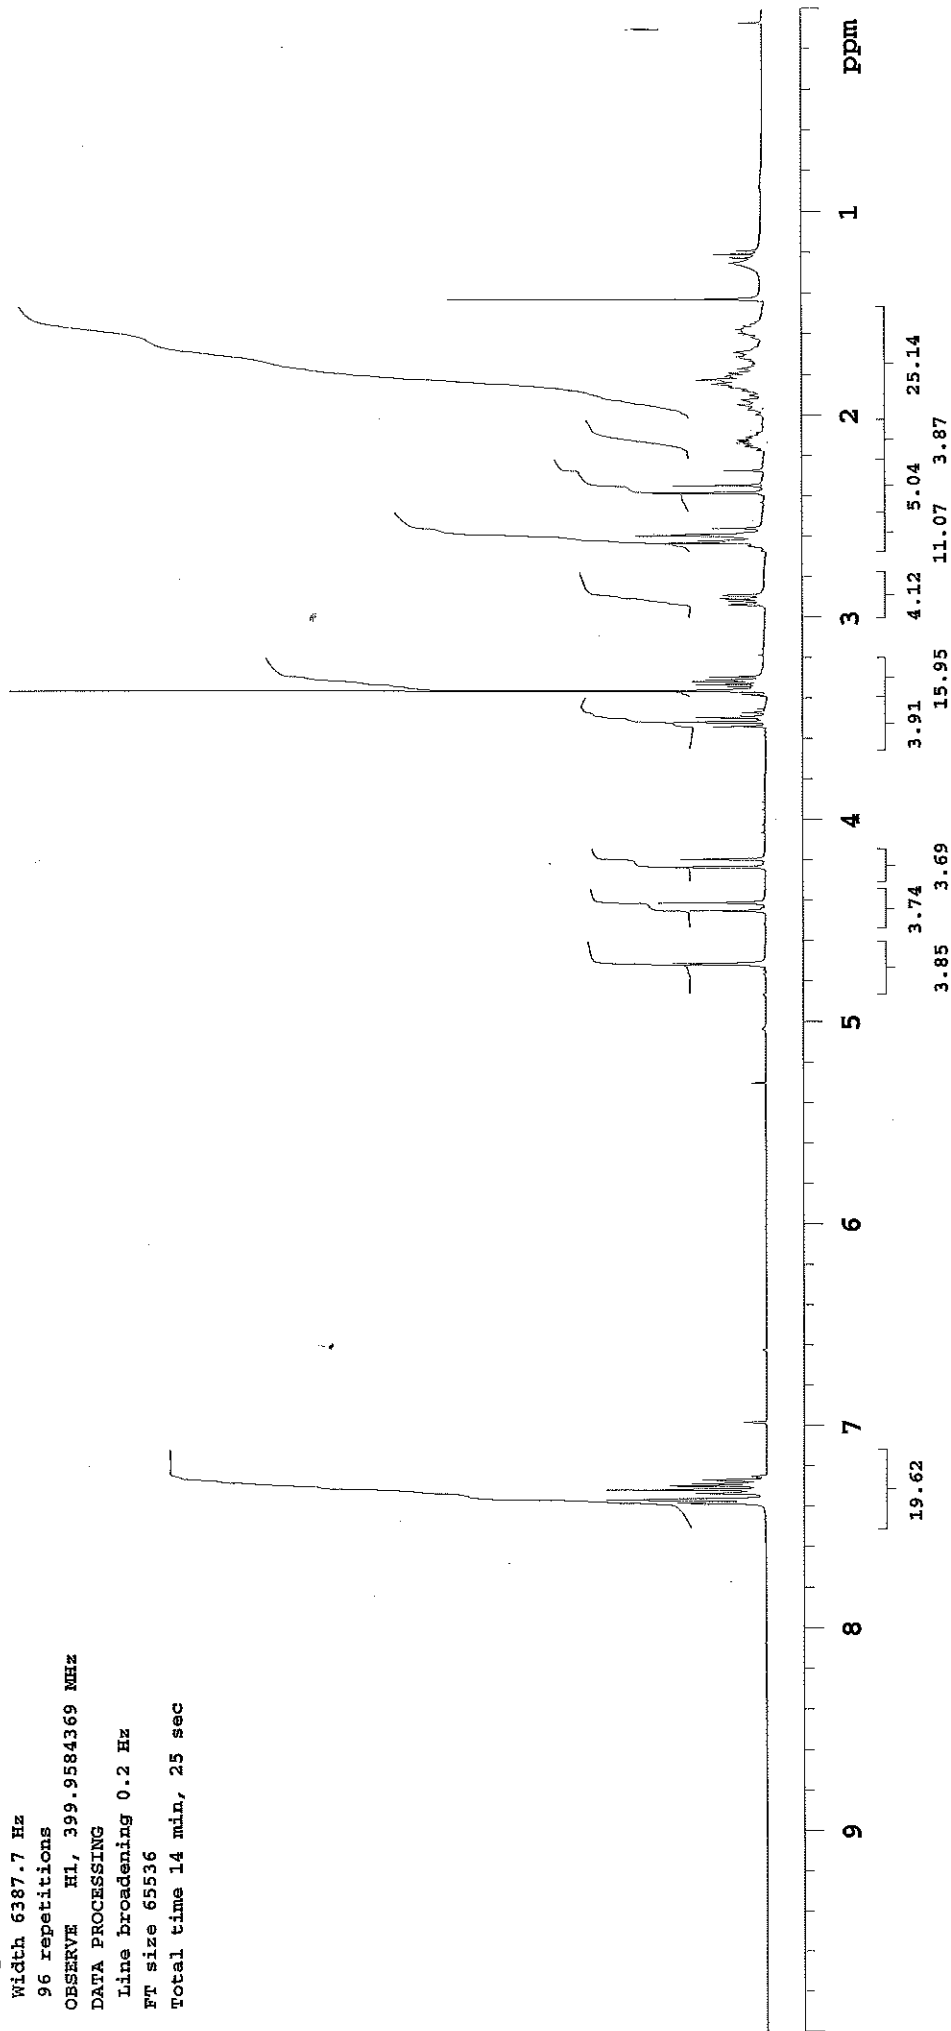

Maxime BUFFAT  
 MB.7.621.B  
 cdcl3  
 Inova 400 (MB)  
 Aramis  
 13C 100MHz  
 29.11.02

Pulse Sequence: s2pul  
 Solvent: cdcl3  
 Ambient temperature  
 INOVA-400 "aramis"

Pulse 36.0 degrees  
 Acq. time 1.311 sec  
 Width 25000.0 Hz  
 32000 repetitions  
 OBSERVE C13, 100.5696348 MHz  
 DECOUPLE H1, 399.9597752 MHz  
 Power 38 dB  
 continuously on  
 WALTZ-16 modulated  
 DATA PROCESSING  
 Line broadening 1.0 Hz  
 Ft size 65536  
 Total time 11 hr, 43 min, 45 sec

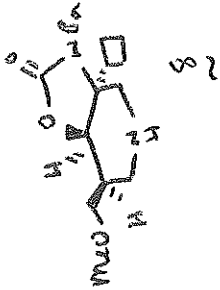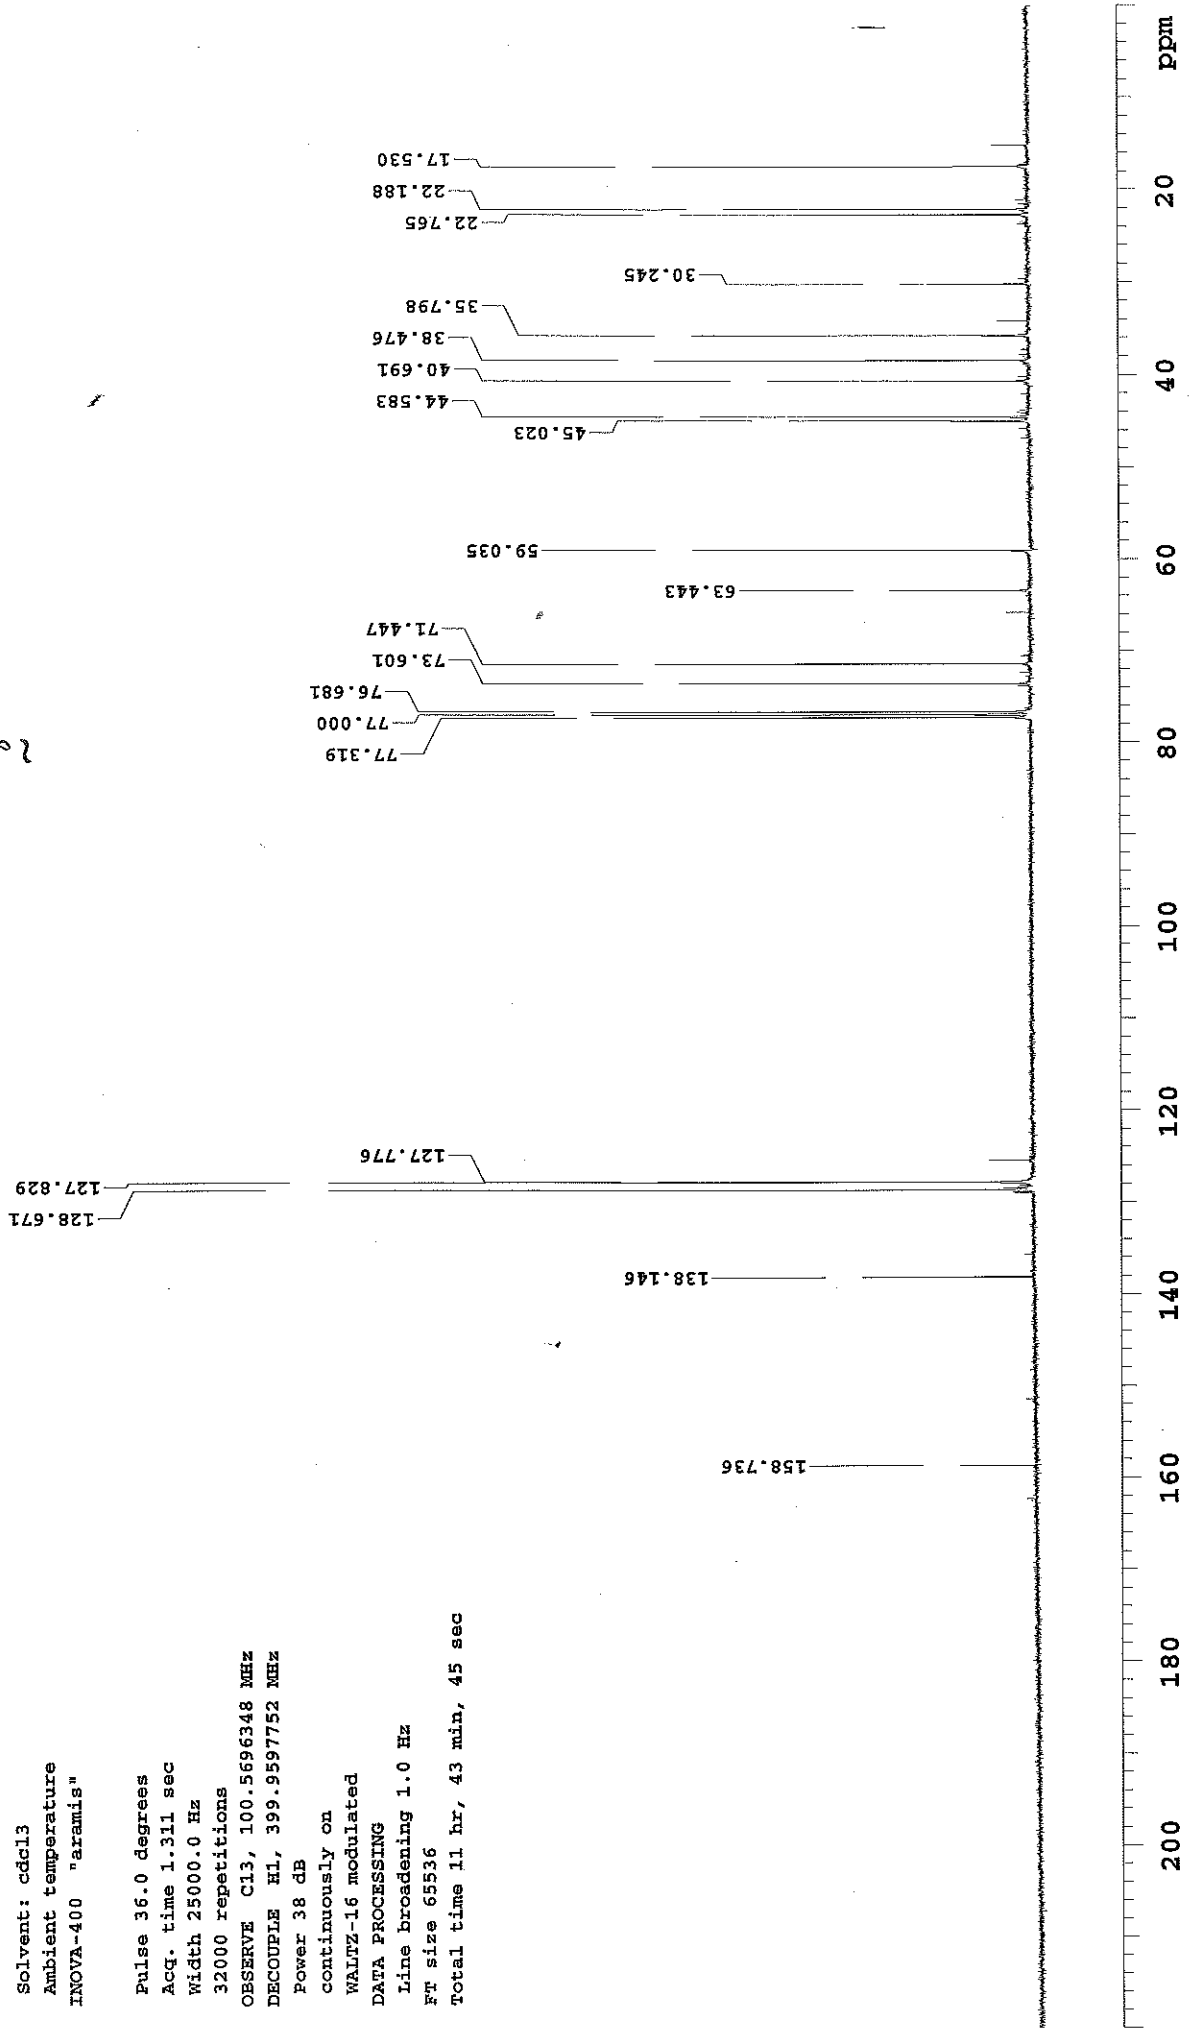

Maxime BUFFAT  
MB.9.801.B  
CDC13  
proton 300MHz  
Inova 300  
porthos  
11.08.03

Solvent: cdc13  
Ambient temperature  
File: MB.9.801.B-300H-11.08.03  
DATE Aug 11 2003  
INOVA-300 "solids"

PULSE SEQUENCE

Relax. delay 5.000 sec  
Pulse 58.1 degrees  
Acq. time 3.636 sec  
Width 4506.0 Hz  
96 repetitions

OBSERVE H1, 300.1031975 MHz  
DATA PROCESSING  
Line broadening 0.3 Hz  
FT size 65536  
Total time 13 minutes

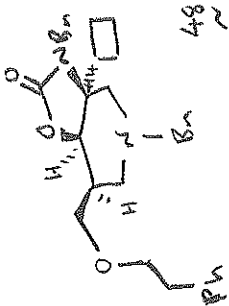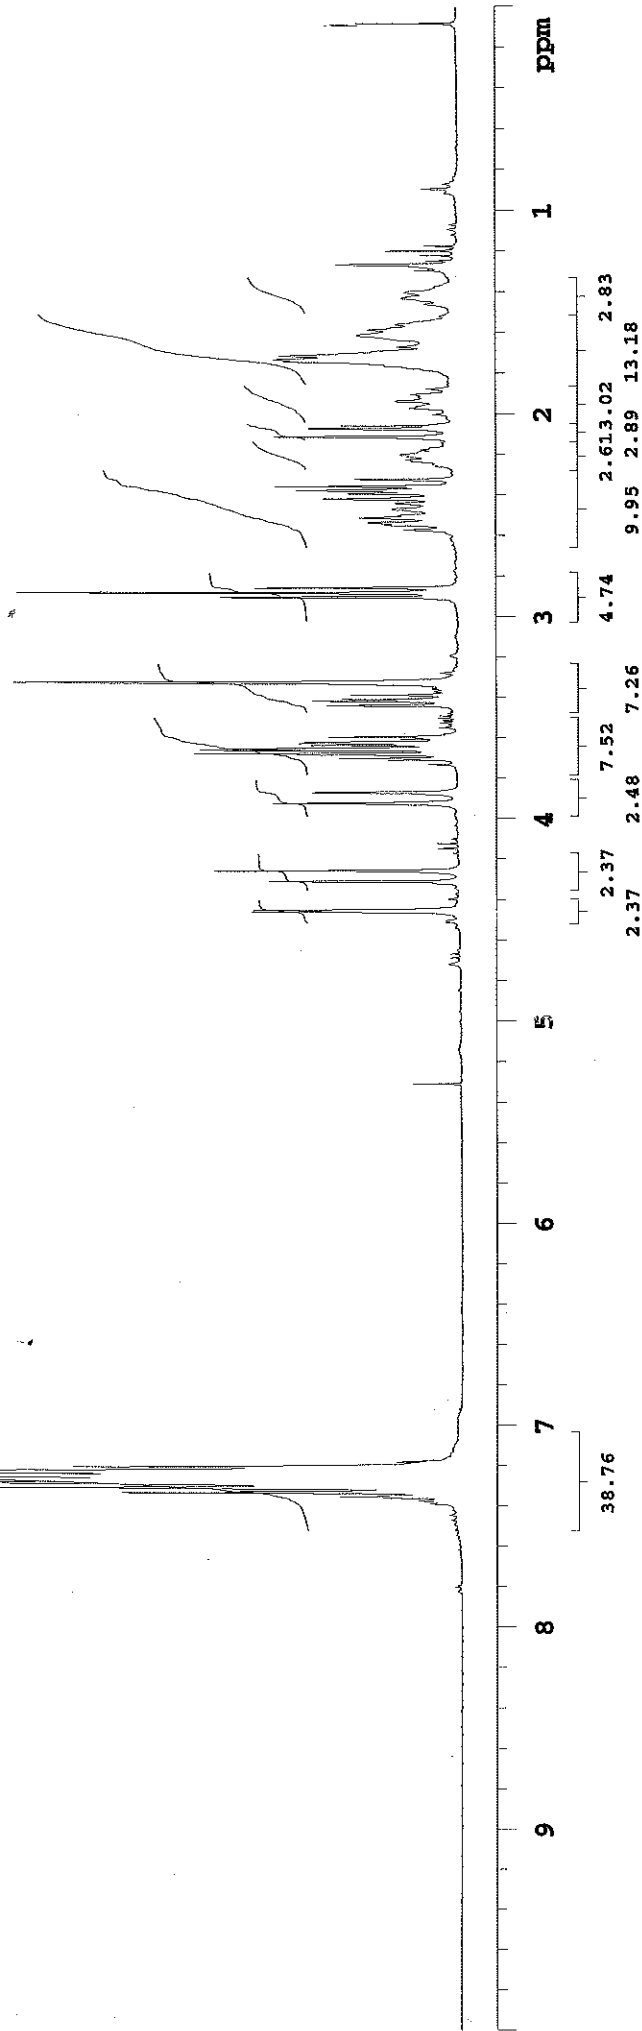

Maxime BUFFAT  
 MB-8.777.BB  
 CDC13  
 13C 75MHz  
 Inova 300  
 porthos  
 25.06.03

Solvent: cdcl3

Ambient temperature

File: MB-9.801.B-300C-11.08.03

DATE Aug 11 2003

INOVA-300 "solids"

PULSE SEQUENCE

Relax. delay 2.000 sec

Pulse 45.0 degrees

Acq. time 1.813 sec

Width 20000.0 Hz

15000 repetitions

OBSERVE C13, 75.4610108 MHz

DECOUPLE H1, 300.1046968 MHz

Power 43 dB

continuously on

WALTZ-16 modulated

DATA PROCESSING

Line broadening 1.0 Hz

FT size 131072

Total time 15.9 hours

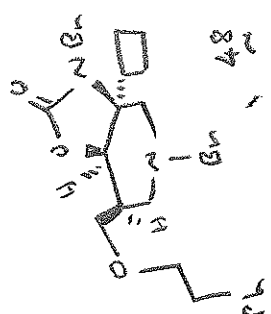

77.421  
 77.000  
 76.575

128.895  
 128.329  
 128.301  
 128.273  
 127.868  
 127.330  
 127.197  
 126.157  
 159.069  
 138.937  
 138.326  
 138.015

74.270  
 72.094  
 70.008  
 64.447  
 61.935  
 52.909  
 50.579  
 44.711  
 39.199  
 36.780  
 36.186  
 23.236  
 22.913  
 17.635

200 180 160 140 120 100 80 60 40 20 ppm

Maxime BUFFAT  
MB. 8.777.BB  
CDC13  
13C 75MHz  
Inova 300  
porthos  
25.06.03

48

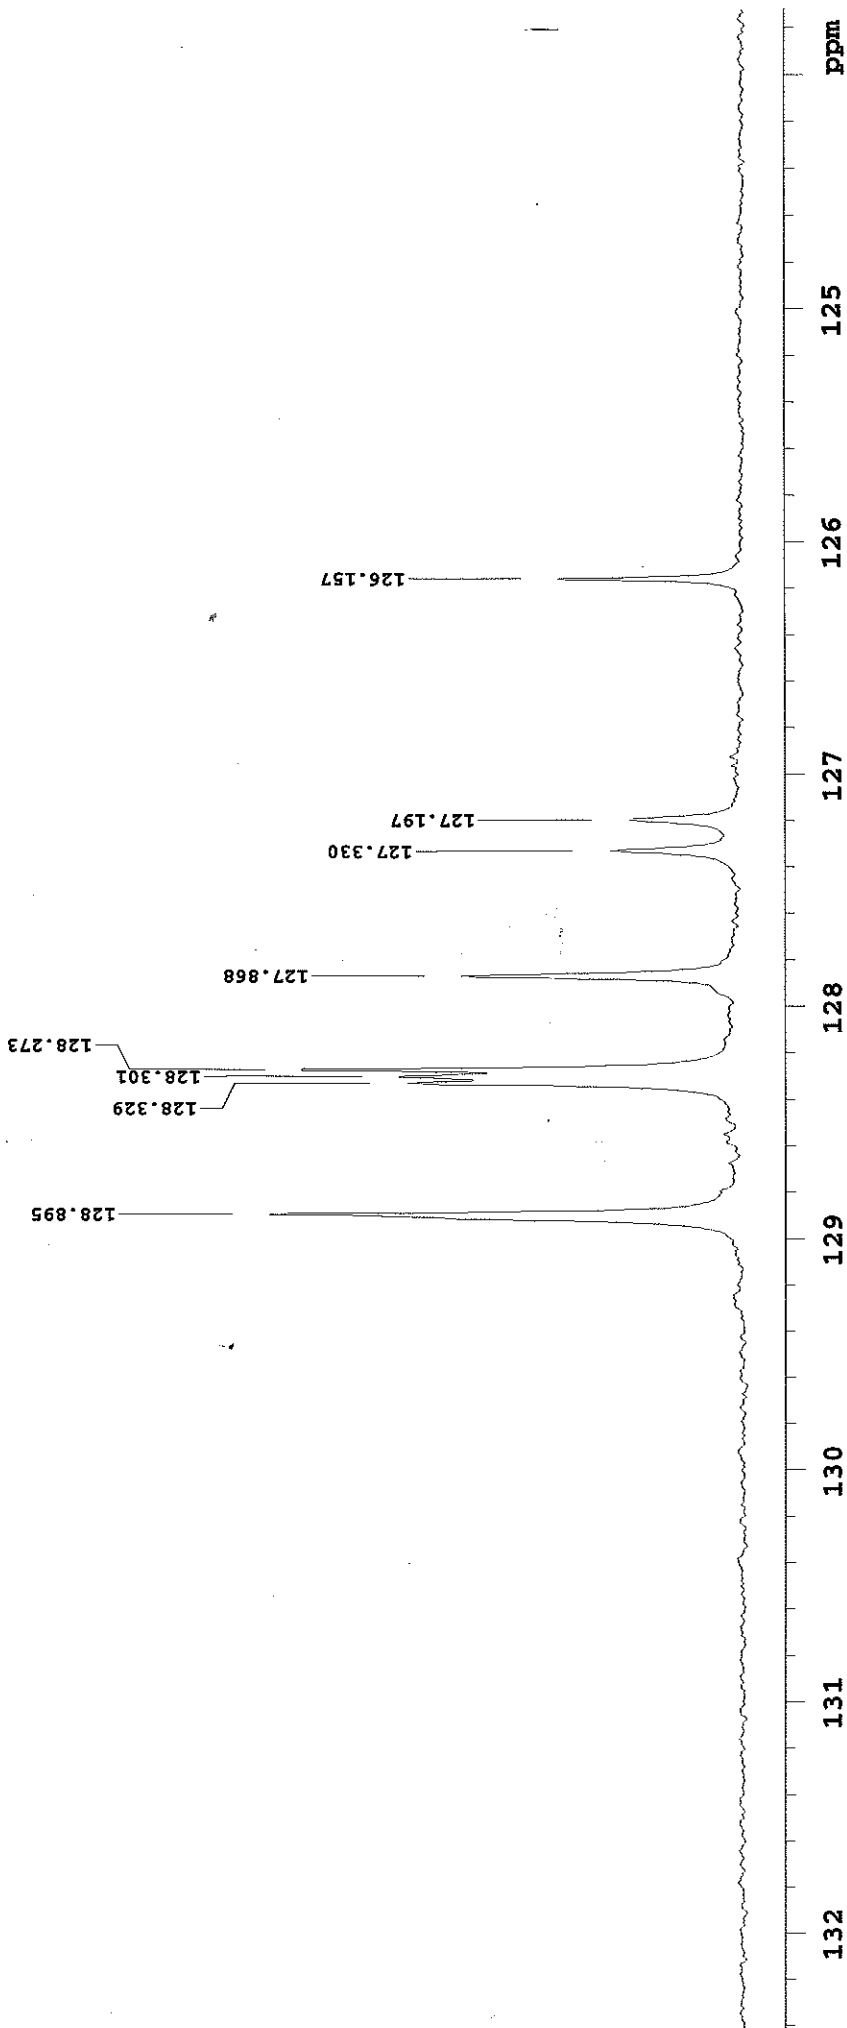

Maxime BUFFAT  
MB.9.814.B  
C6D6  
Inova 400 (MB)  
Aramis  
Proton 400MHz  
02.09.03

Pulse Sequence: s2pul  
Solvent: c6d6  
Ambient temperature  
User: 1-12-87  
INOVA-400 "aramis"

Relax. delay 5.000 sec  
Pulse 36.0 degrees  
Acq. time 4.008 sec  
Width 6387.7 Hz  
39 repetitions  
OBSERVE H1, 399.9584369 MHz  
DATA PROCESSING  
Line broadening 0.2 Hz  
FT size 65236  
Total time 14 min, 25 sec

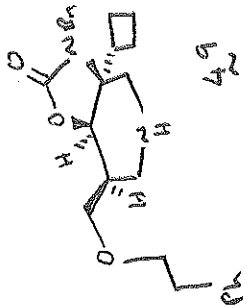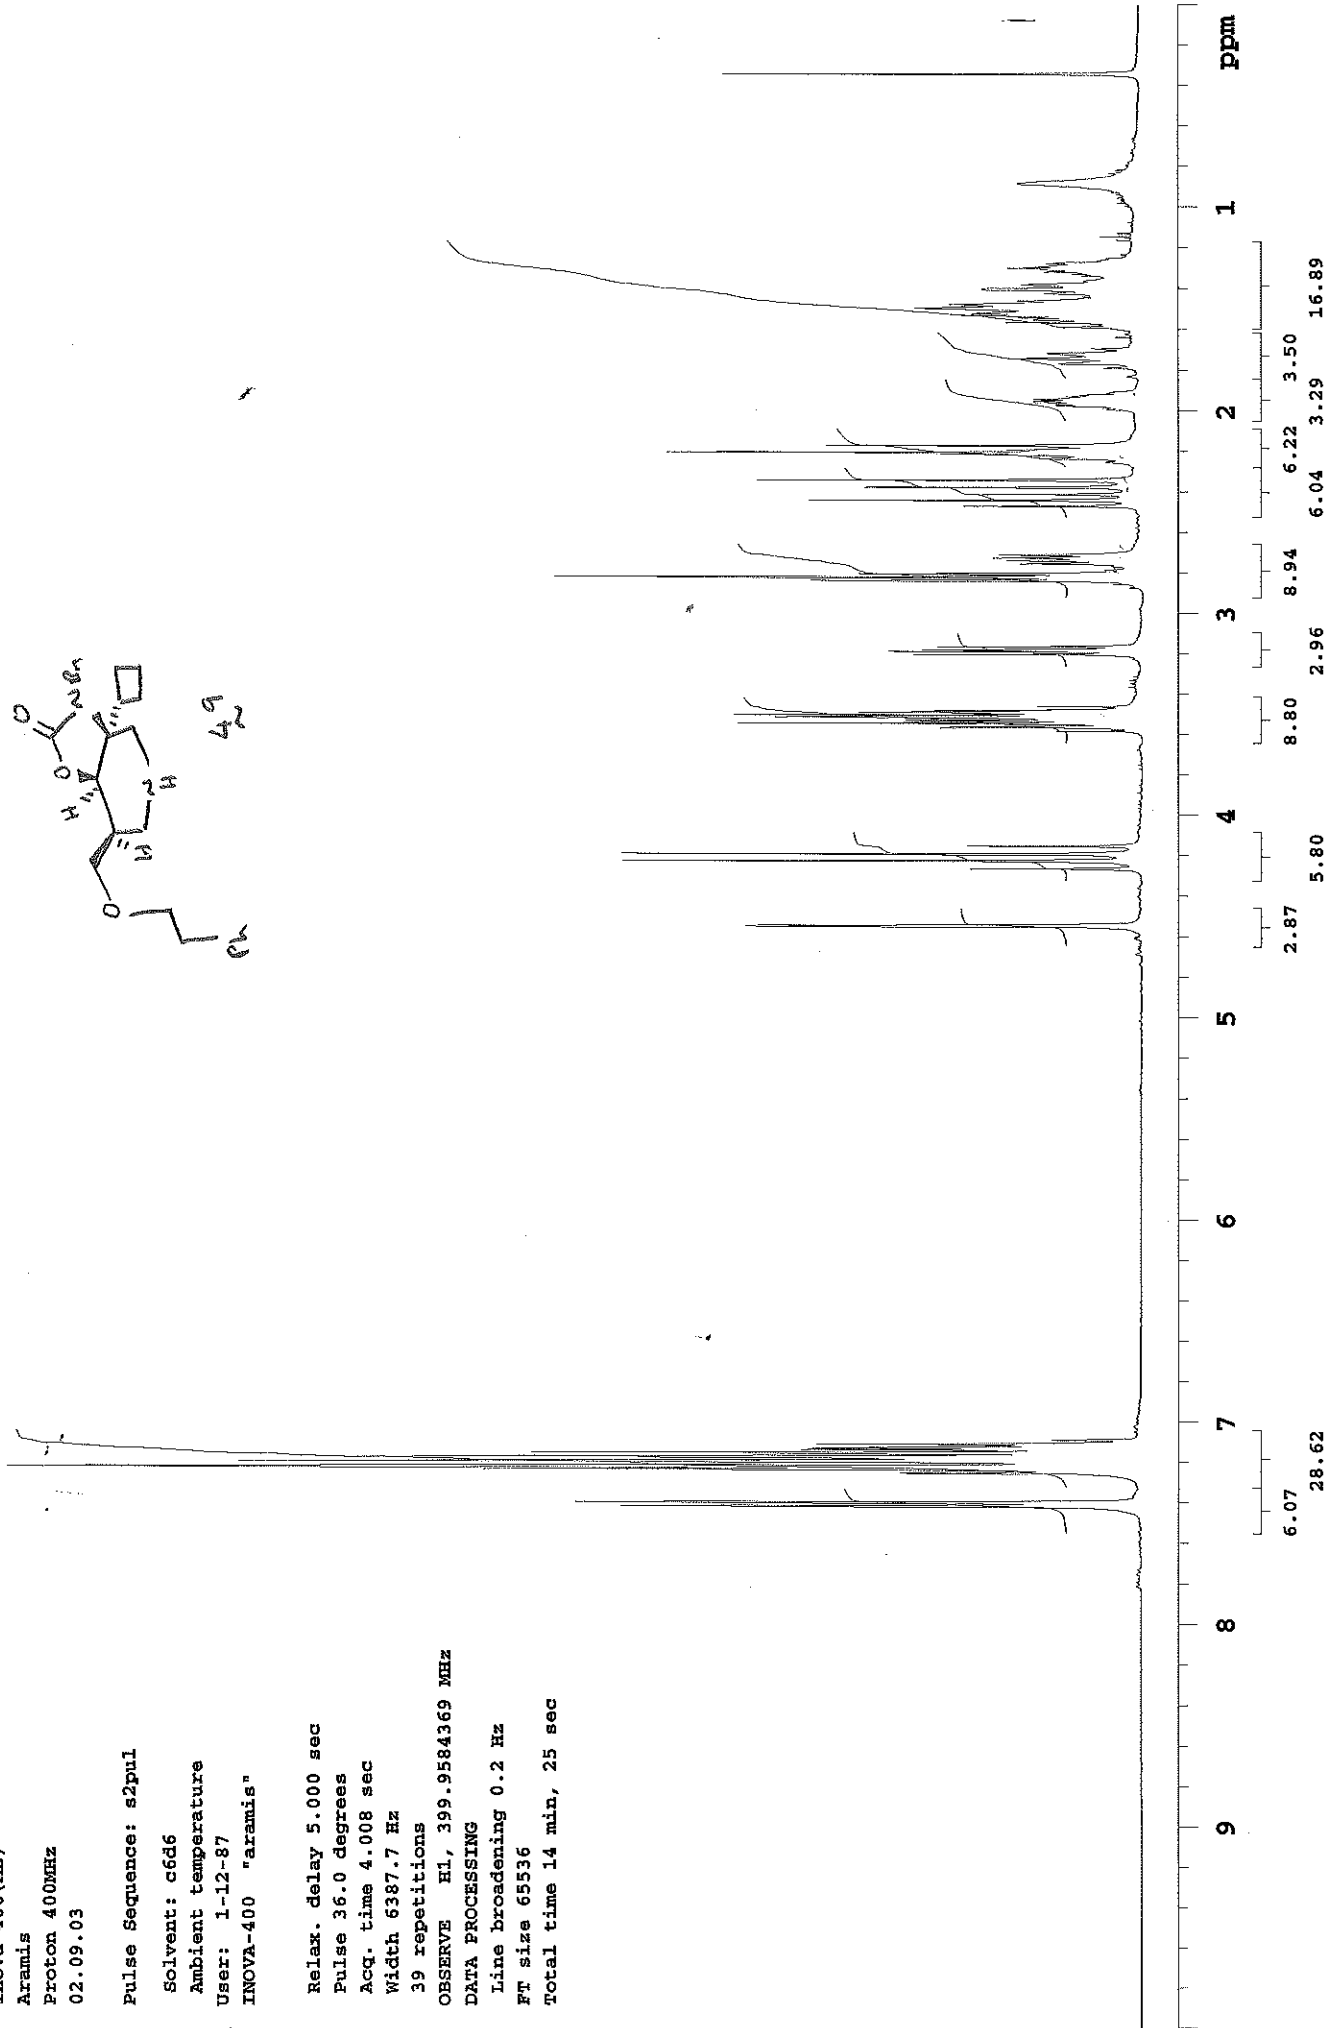



Maxime BUFFAT  
 MB.9.814.B  
 C6D6  
 Inova 400 (MB)  
 Aramis  
 13C 100MHz  
 02.09.03

Pulse Sequence: s2pul

Solvent: c6d6  
 Ambient temperature  
 INOVA-400 "aramis"

Relax. delay 2.000 sec  
 Pulse 36.0 degrees  
 Acq. time 1.311 sec  
 Width 25000.0 Hz

300 repetitions

OBSERVE C13, 100.5696337 MHz

DECOUPLE H1, 399.9598112 MHz

Power 38 dB

continuously on

WALTZ-16 modulated

DATA PROCESSING

Line broadening 1.0 Hz

FT size 65536

Total time 9 hr, 13 min, 15 sec

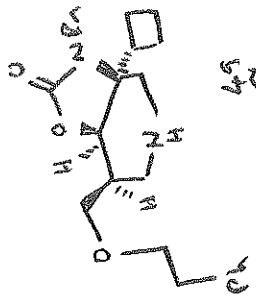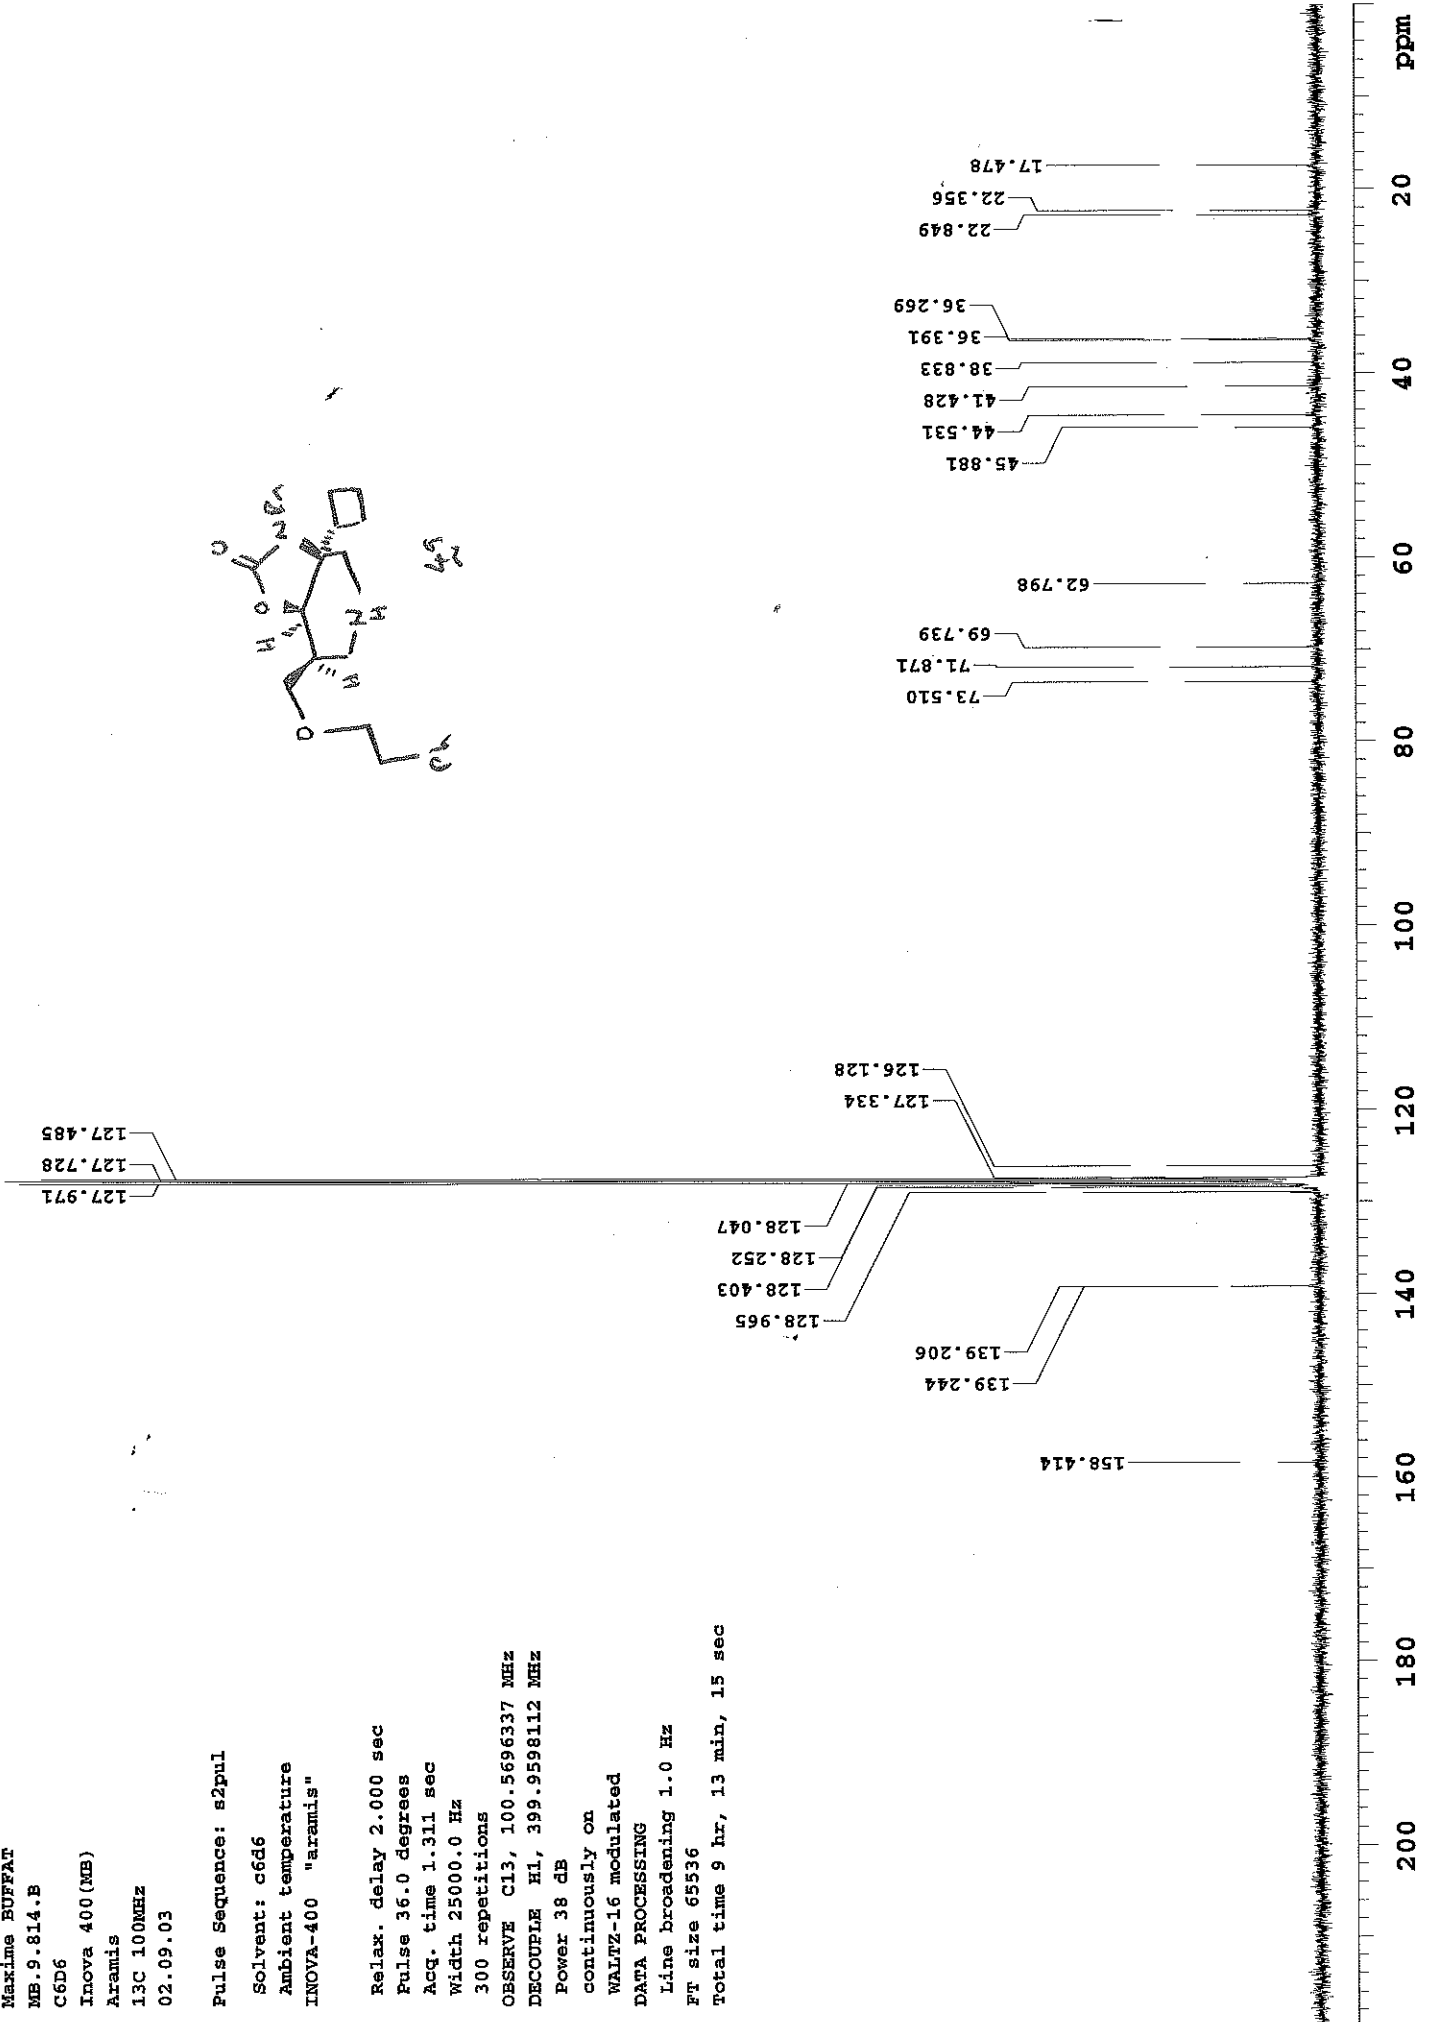

Maxime BUFFAT  
MB.9.814.B  
C6D6  
Inova 400 (MB)  
Aramis  
13C 100MHZ  
02.09.03

Pulse Sequence: s2pul

49  
2

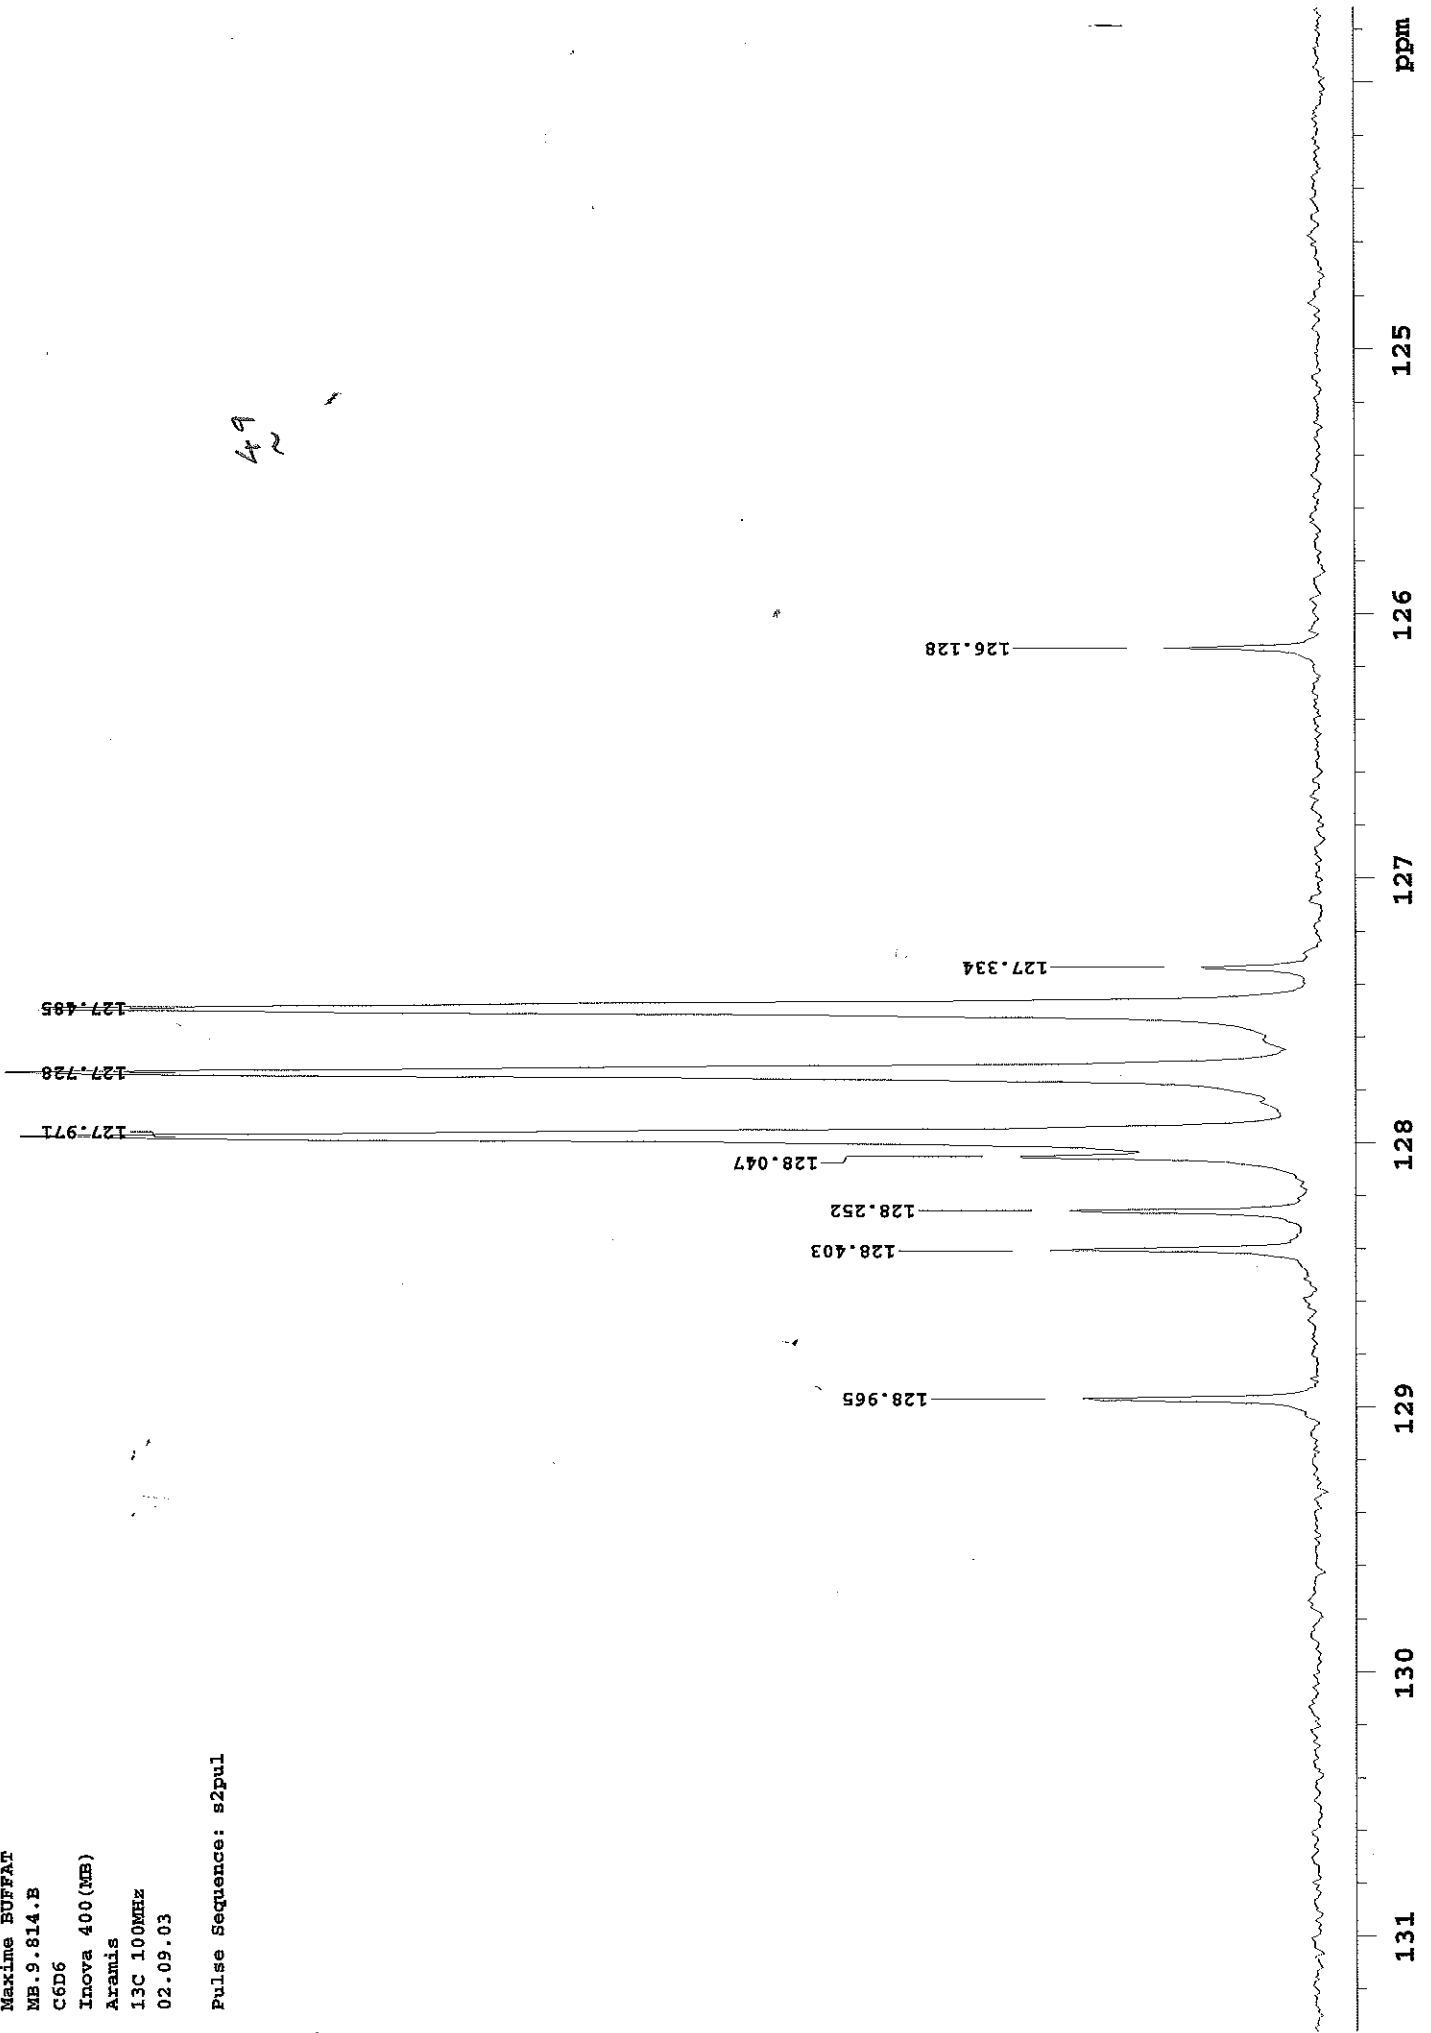

snee 461  
mPROTONight CDC13 /opt/bruk500data/2009/Jun ejt 52

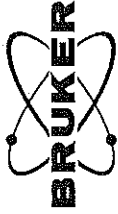

NAME 2009-06-02-ejt-52

EXPNO 23

PROCNO 1

Date\_ 20090602

Time 17.21

INSTRUM spect

PROBHD 5 mm TXI 1H/D-

PULPROG zg30b

TD 65536

SOLVENT CDC13

NS 32

DS 0

SWH 10330.578 Hz

FIDRES 0.157632 Hz

AQ 3.1719923 sec

RG 575

DW 48.400 usec

DE 13.38 usec

TE 291.6 K

D1 1.00000000 sec

TD0 1

==== CHANNEL f1 =====  
NUC1 1H  
P1 8.20 usec  
PL1 3.25 dB  
PL1W 12.12272263 W  
SF01 500.1330885 MHz  
SI 32768  
SF 500.1300463 MHz  
WDW EM  
SSB 0  
LB 0.30 Hz  
GB 0  
PC 1.00

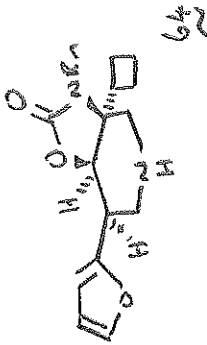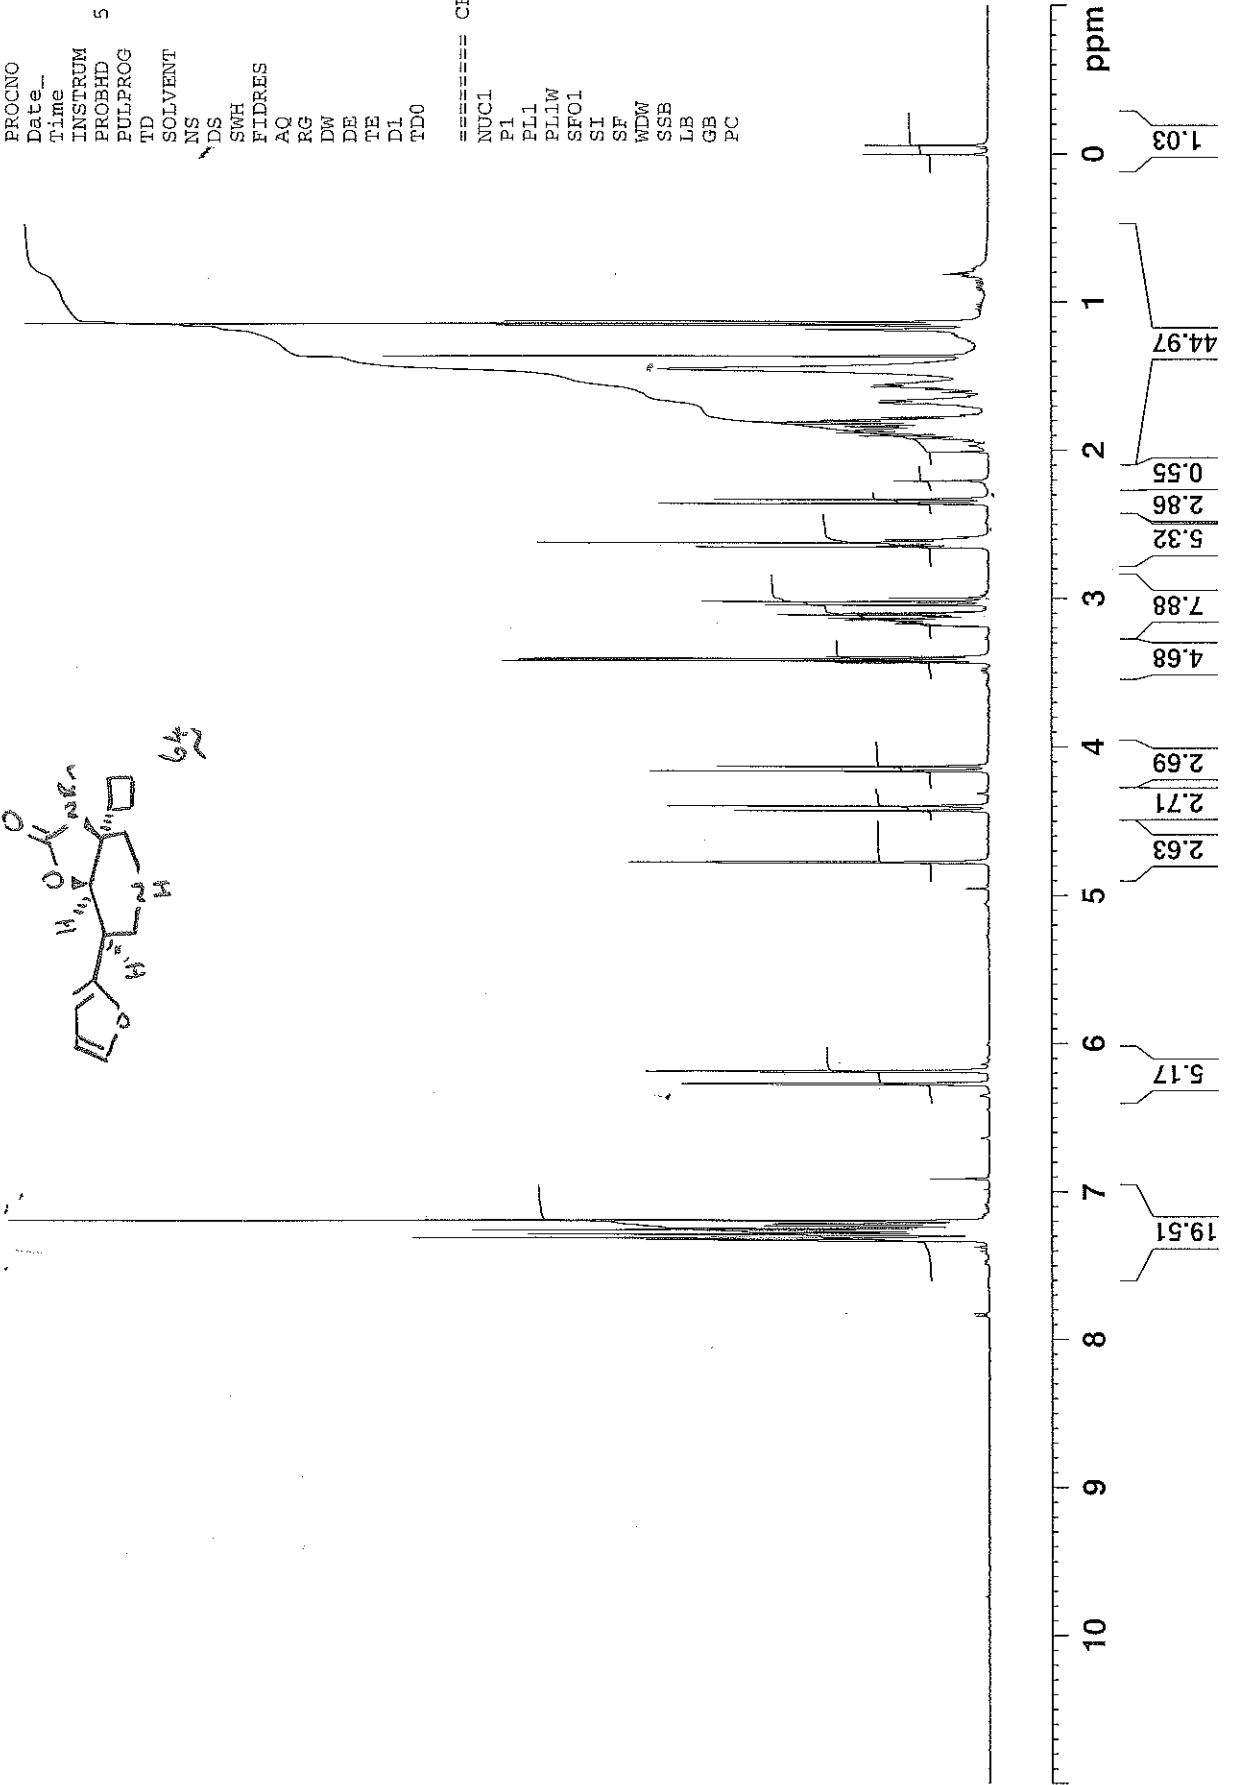

snee 465

mPROTONnight CDCI3 {e:\bruk400data\2009\Jun} ejt 43

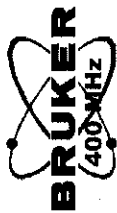

2009-06-19-ejt-43

NAME  
EXPNO 10  
PROCNO 1  
Date\_ 20090620  
Time\_ 17.21  
INSTRUM AV400  
PROBHD 5 mm PABBO BB-  
PULPROG zg30b  
TD 65536  
SOLVENT CDCI3  
NS 16  
DS 0  
SWH 8264.463 Hz  
FIDRES 0.126106 Hz  
AQ 3.9649780 sec  
RG 256  
DM 60.500 usec  
DE 9.40 usec  
TE 295.9 K  
D1 1.00000000 sec  
TD0 1

==== CHANNEL f1 =====

NUC1 1H  
P1 10.00 usec  
PL1 -3.60 dB  
PL1W 17.83863831 W  
SF01 400.1324710 MHz  
SI 32768  
SF 400.1299263 MHz  
WDW EM  
SSB 0  
LB 0.30 Hz  
GB 0  
PC 1.00

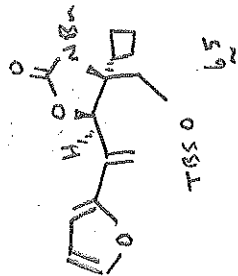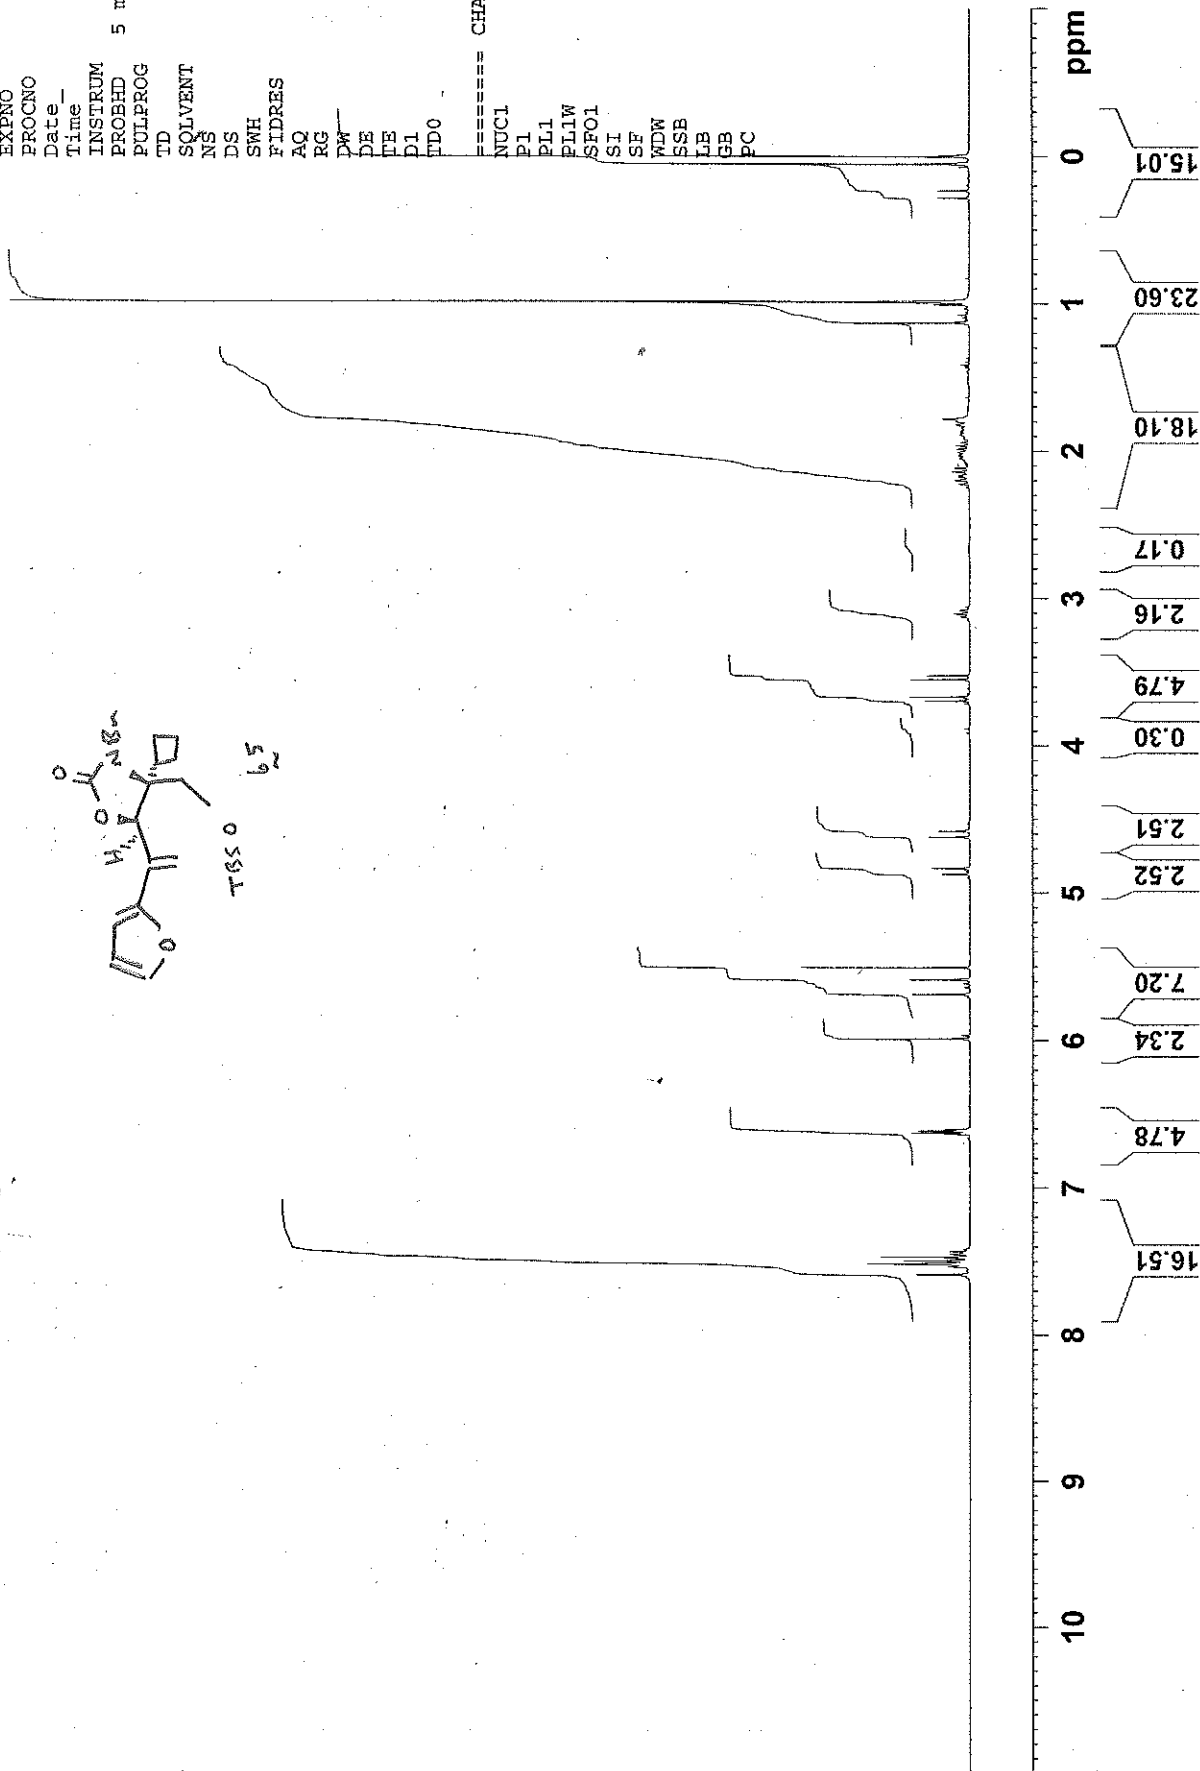

snee 465  
 mCARBONnight CDCI3 {e:\bruk400data\2009\Jun} ejt 43

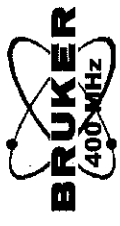

2009-06-19-ejt-43  
 NAME 11  
 EXPNO 1  
 PROCNO 1  
 Date 20090620  
 Time 17.35  
 INSTRUM AV400  
 PROHD 5 mm PABBO BB-  
 PULPROG zgpg30  
 TD 65536  
 SOLVENT CDCl3  
 NS 256  
 DS 2  
 SMH 30241.936 Hz  
 FIDRES 0.461455 Hz  
 AQ 1.0835786 sec  
 RG 512  
 DW 16.533 usec  
 DE 7.83 usec  
 TE 296.4 K  
 D1 2.0000000 sec  
 D11 0.0300000 sec  
 TD0 1

==== CHANNEL f1 =====  
 NUC1 13C  
 P1 8.00 usec  
 PLL 0.00 dB  
 PL1W 34.91522217 W  
 SF01 100.6241042 MHz

==== CHANNEL f2 =====  
 CPDPRG2 waltz16  
 NUC2 1H  
 P2 90.00 usec  
 PL2 -3.60 dB  
 PL12 15.31 dB  
 PL13 18.00 dB  
 PL1W 17.83863831 W  
 PL12W 0.22927761 W  
 PL13W 0.12341322 W  
 SF02 400.1316005 MHz  
 SI 32768  
 SF 100.6127690 MHz  
 EM  
 SSB 0  
 LB 1.00 Hz  
 GB 0  
 PC 1.40

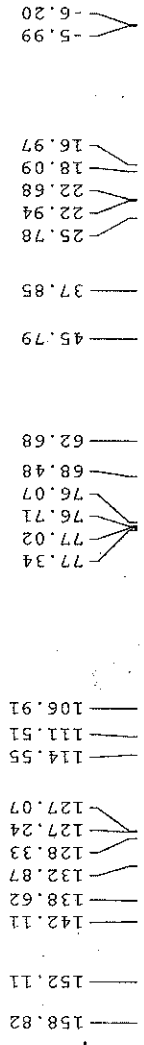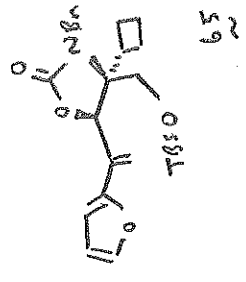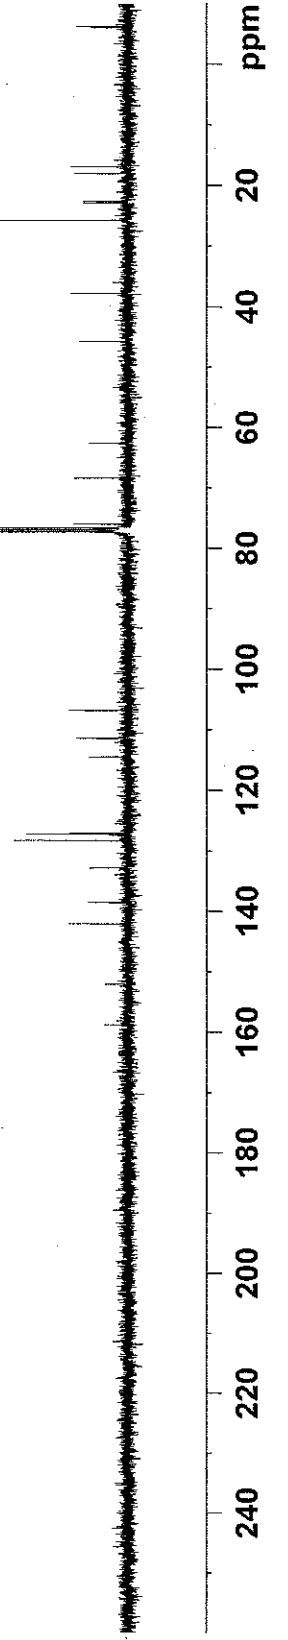

snee 255  
mPROTONight CDC13 /opt/bruk500data/2008/Oct ejt 4

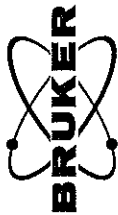

2008-10-07-ejt-4

NAME  
EXPNO 10  
PROCNO 1  
Date\_ 20081007  
Time 18.32  
INSTRUM spect  
PROBHD 5 mm TXI 1H/D-  
PULPROG zg30b  
TD 65536  
SOLVENT CDC13  
NS 16  
DS 0  
SWH 10330.578 Hz  
FIDRES 0.157632 Hz  
AQ 3.1719923 sec  
RG 57  
DW 48.400 usec  
DE 13.38 usec  
TE 292.4 K  
D1 1.00000000 sec  
TD0 1

==== CHANNEL f1 =====  
NUC1 1H  
P1 8.20 usec  
PL1 3.25 dB  
PL1W 12.1272263 W  
SF01 500.1330885 MHz  
SI 32768  
SF 500.1300474 MHz  
WDW EM  
SSB 0  
LB 0.30 Hz  
GB 0  
PC 1.00

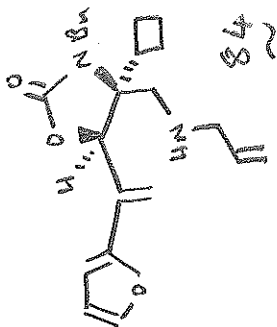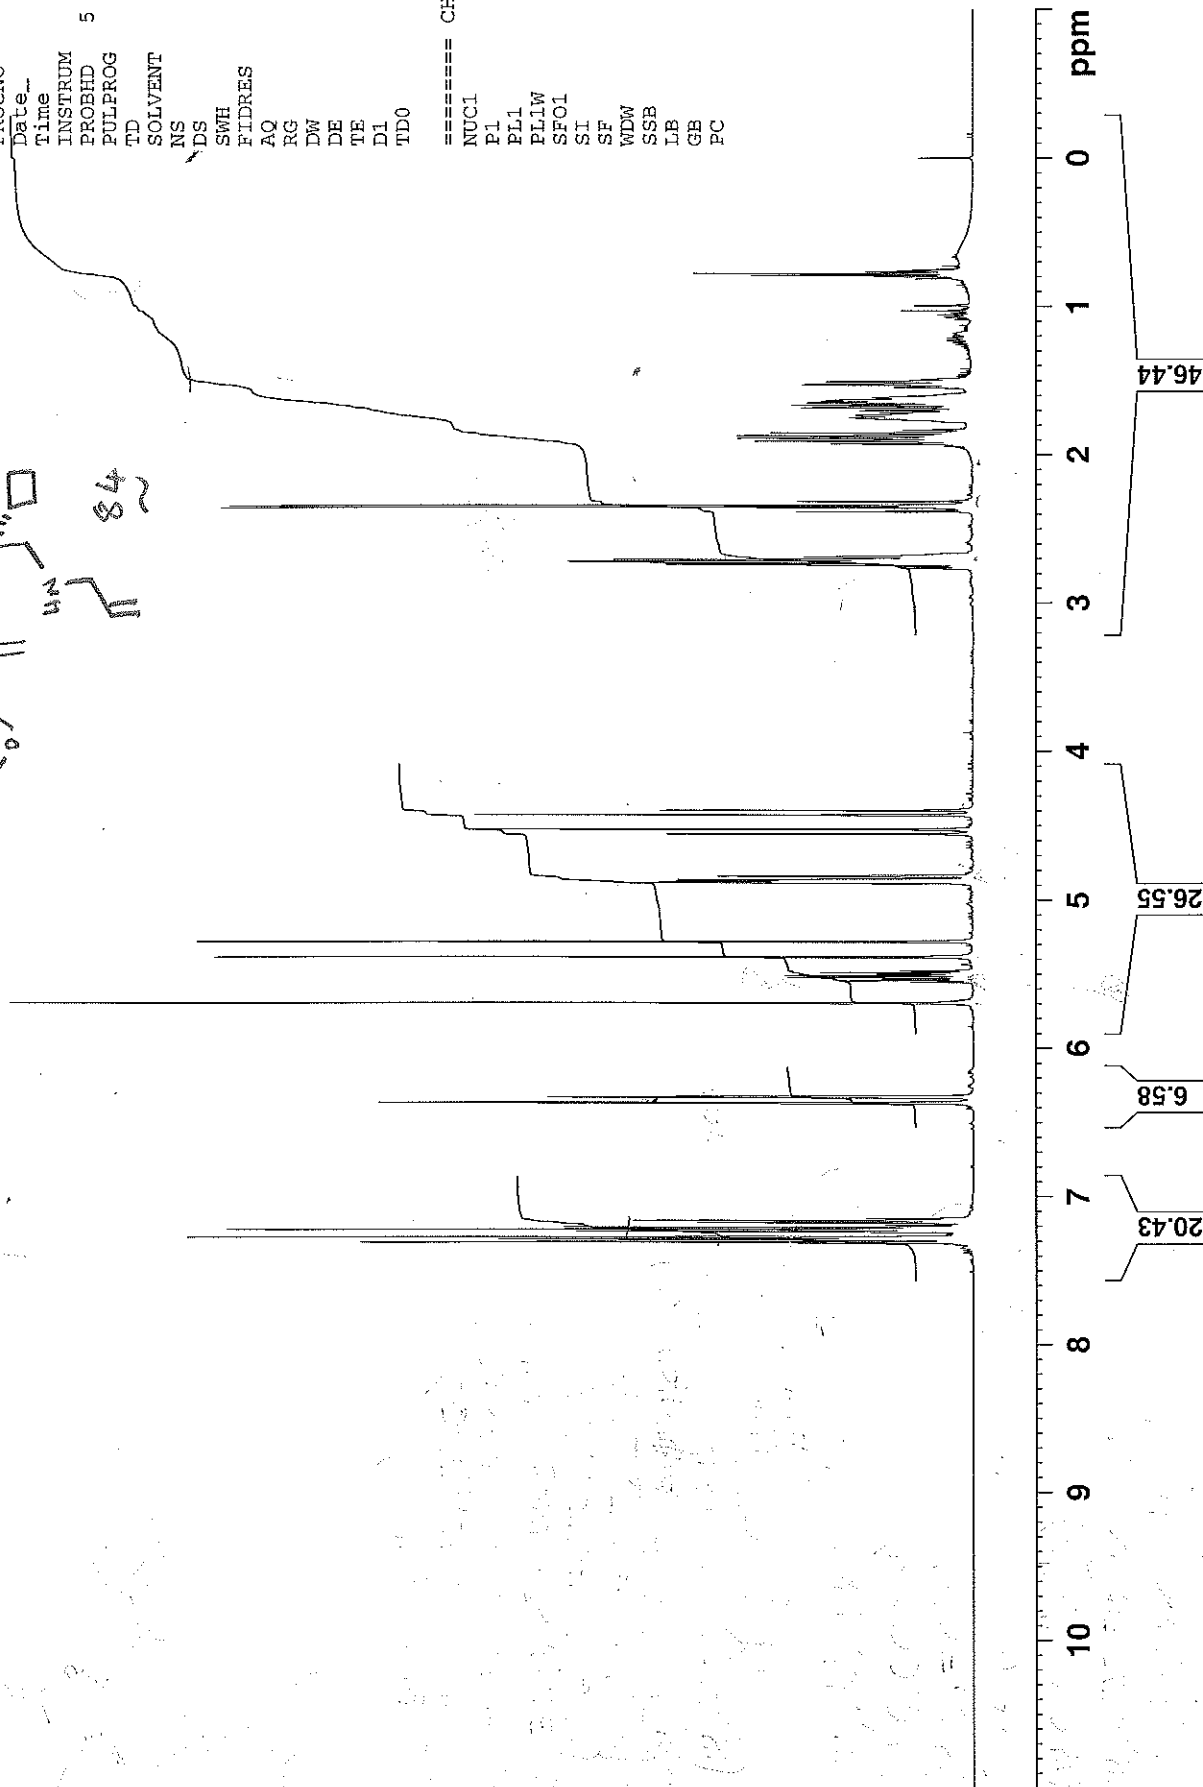

snee320  
STANDARD 1H OBSERVE

Automation directory: /data/nmrdata/Aug04  
File : 0102

Pulse Sequence: s2pul

Solvent: cdcl3  
DATE Aug 4 2008  
Sample #1  
File: 0102  
INOVA-300 "var300b"

Relax. delay 1.000 sec  
Pulse 45.0 degrees  
Acq. time 1.815 sec  
Width 18850.1 Hz  
256 repetitions  
OBSERVE C13, 75.3962883 MHz  
DECOUPLE H1, 299.8473786 MHz  
Power 37 dB  
continuously on  
WALTZ-16 modulated  
DATA PROCESSING  
Line broadening 1.0 Hz  
Ft size 131072  
Total time 12 min, 2 sec

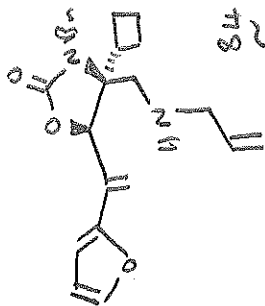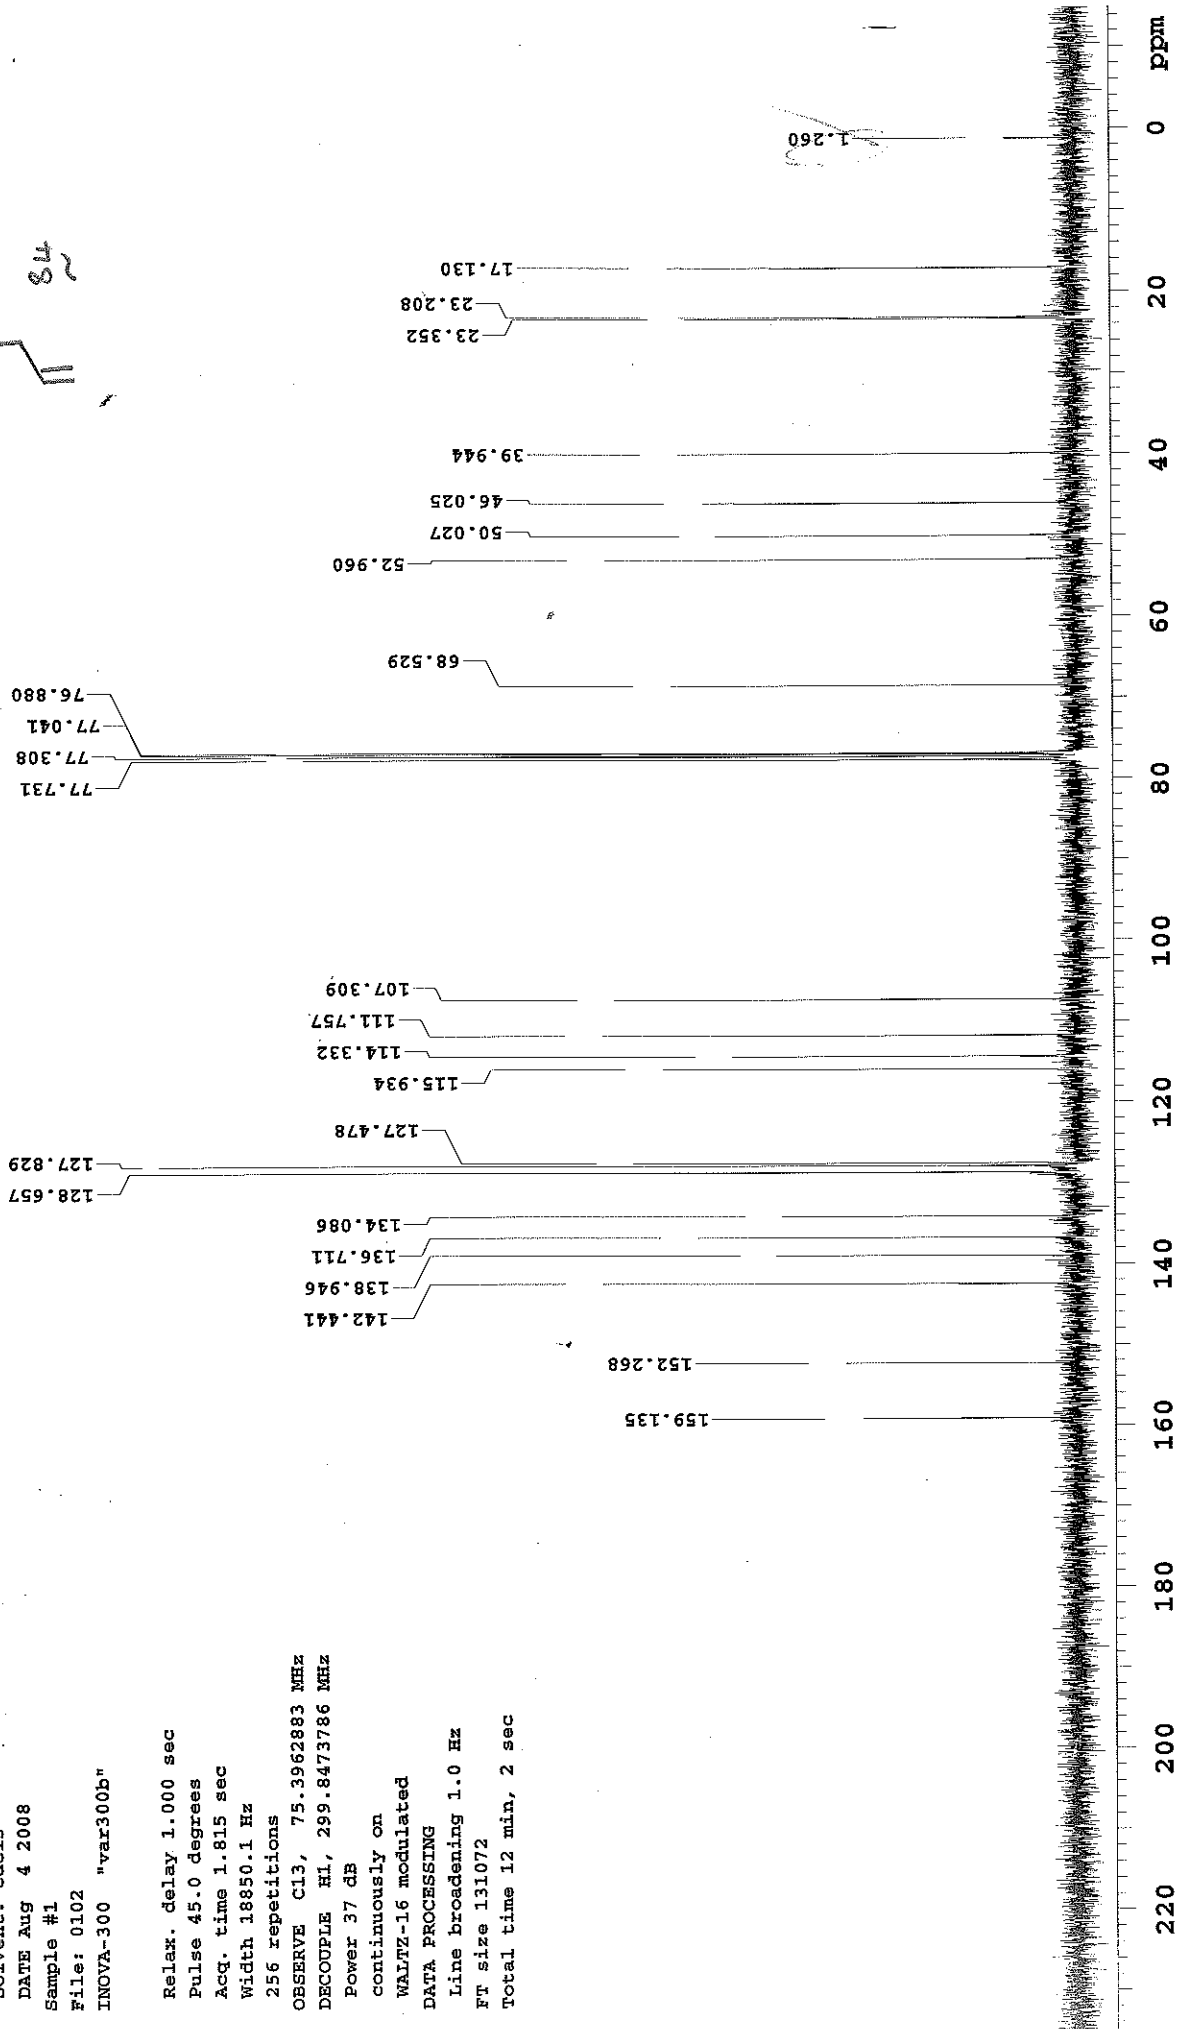

snee446  
 mPROTON CDCI3 {e:\bruk400data\2009\May} ejt 49

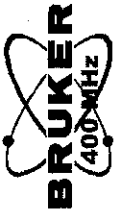

2009-05-28-ejt-49  
 NAME  
 EXPNO 10  
 PROCNO 1  
 Date\_ 20090528  
 Time 7.12  
 INSTRUM AV400  
 PROBHD 5 mm PABBO BB-  
 PULPROG zg30b  
 TD 65536  
 SOLVENT CDCl3  
 NS 16  
 DS 0  
 SWH 8264.463 Hz  
 FIDRES 0.126106 Hz  
 AQ 3.9649780 sec  
 RG 181  
 DW 60.500 usec  
 DE 9.40 usec  
 TE 295.9 K  
 D1 1.00000000 sec  
 TD0 1

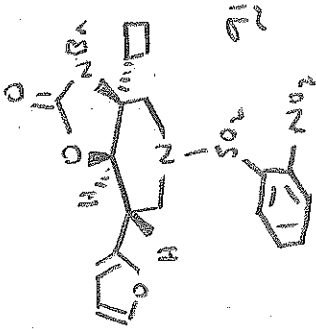

==== CHANNEL f1 =====  
 NUC1 1H  
 P1 10.00 usec  
 PL1 -3.60 dB  
 PL1W 17.83863831 W  
 SF01 400.1324710 MHz  
 SI 32768  
 SF 400.1300063 MHz  
 EM  
 SSB 0  
 LB 0.30 Hz  
 GB 0  
 PC 1.00

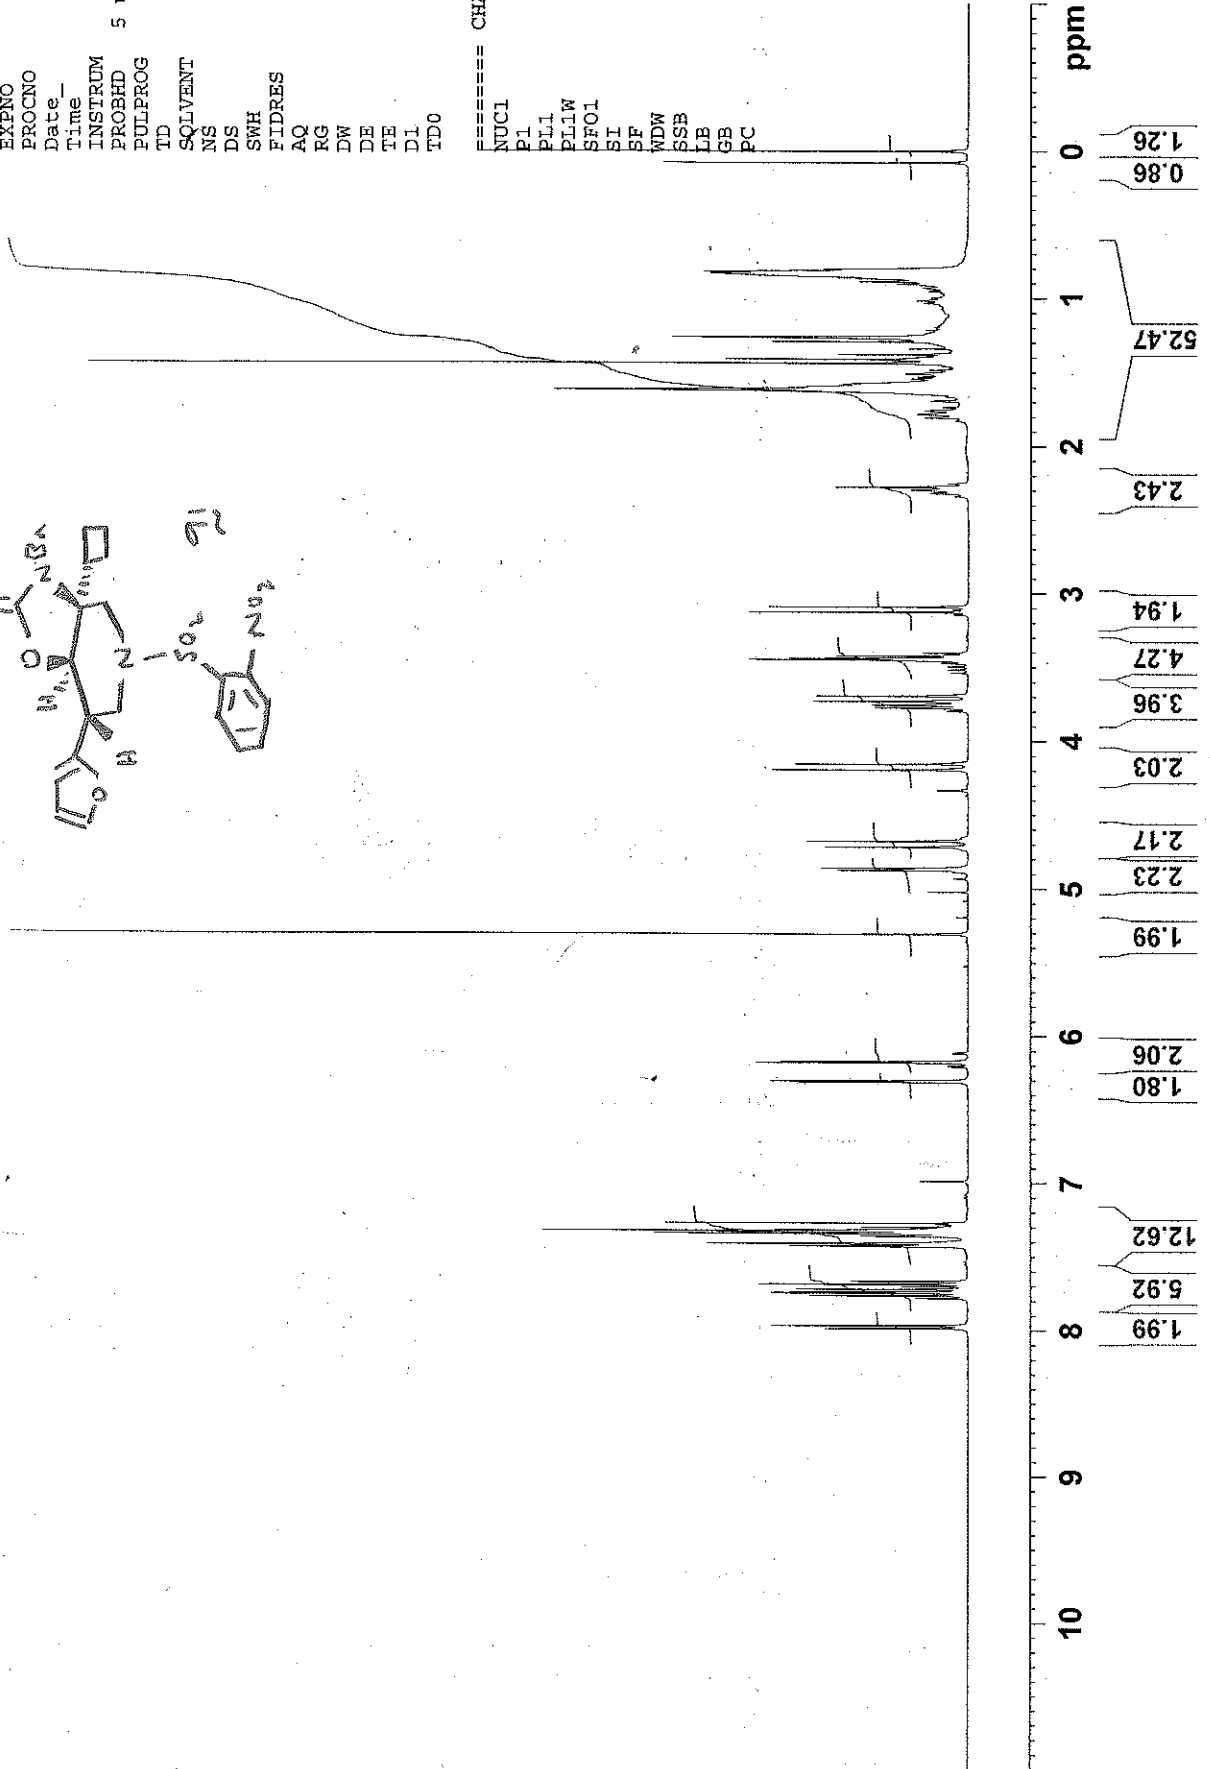



snee 436 rf 0.84  
mPROTONight CDC13 /opt/bruk500data/2009/Apr ejt 15

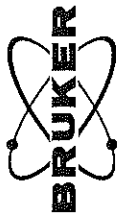

2009-05-05-ejt-15

NAME  
EXPNO 10  
PROCNO 1  
Date\_ 20090505  
Time 19.04  
INSTRUM spect  
PROBHD 5 mm TXI 1H/D-  
PULPROG zg30b  
TD 65536  
SOLVENT CDC13  
NS 16  
DS 0  
SWH 10330.578 Hz  
FIDRES 0.157632 Hz  
AQ 3.1719923 sec  
RG 161  
DW 48.400 usec  
DE 13.38 usec  
TE 296.5 K  
D1 1.00000000 sec  
TD0 1

==== CHANNEL f1 =====  
NUC1 1H  
P1 8.20 usec  
PL1 3.25 dB  
PL1W 12.12272263 W  
SF01 500.1330885 MHz  
SI 32768  
SF 500.1300210 MHz  
WDW EM  
SSB 0  
LB 0.30 Hz  
GB 0  
PC 1.00

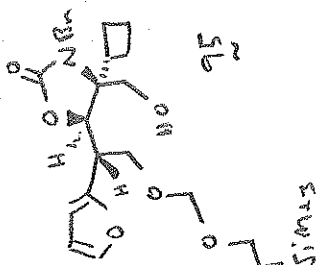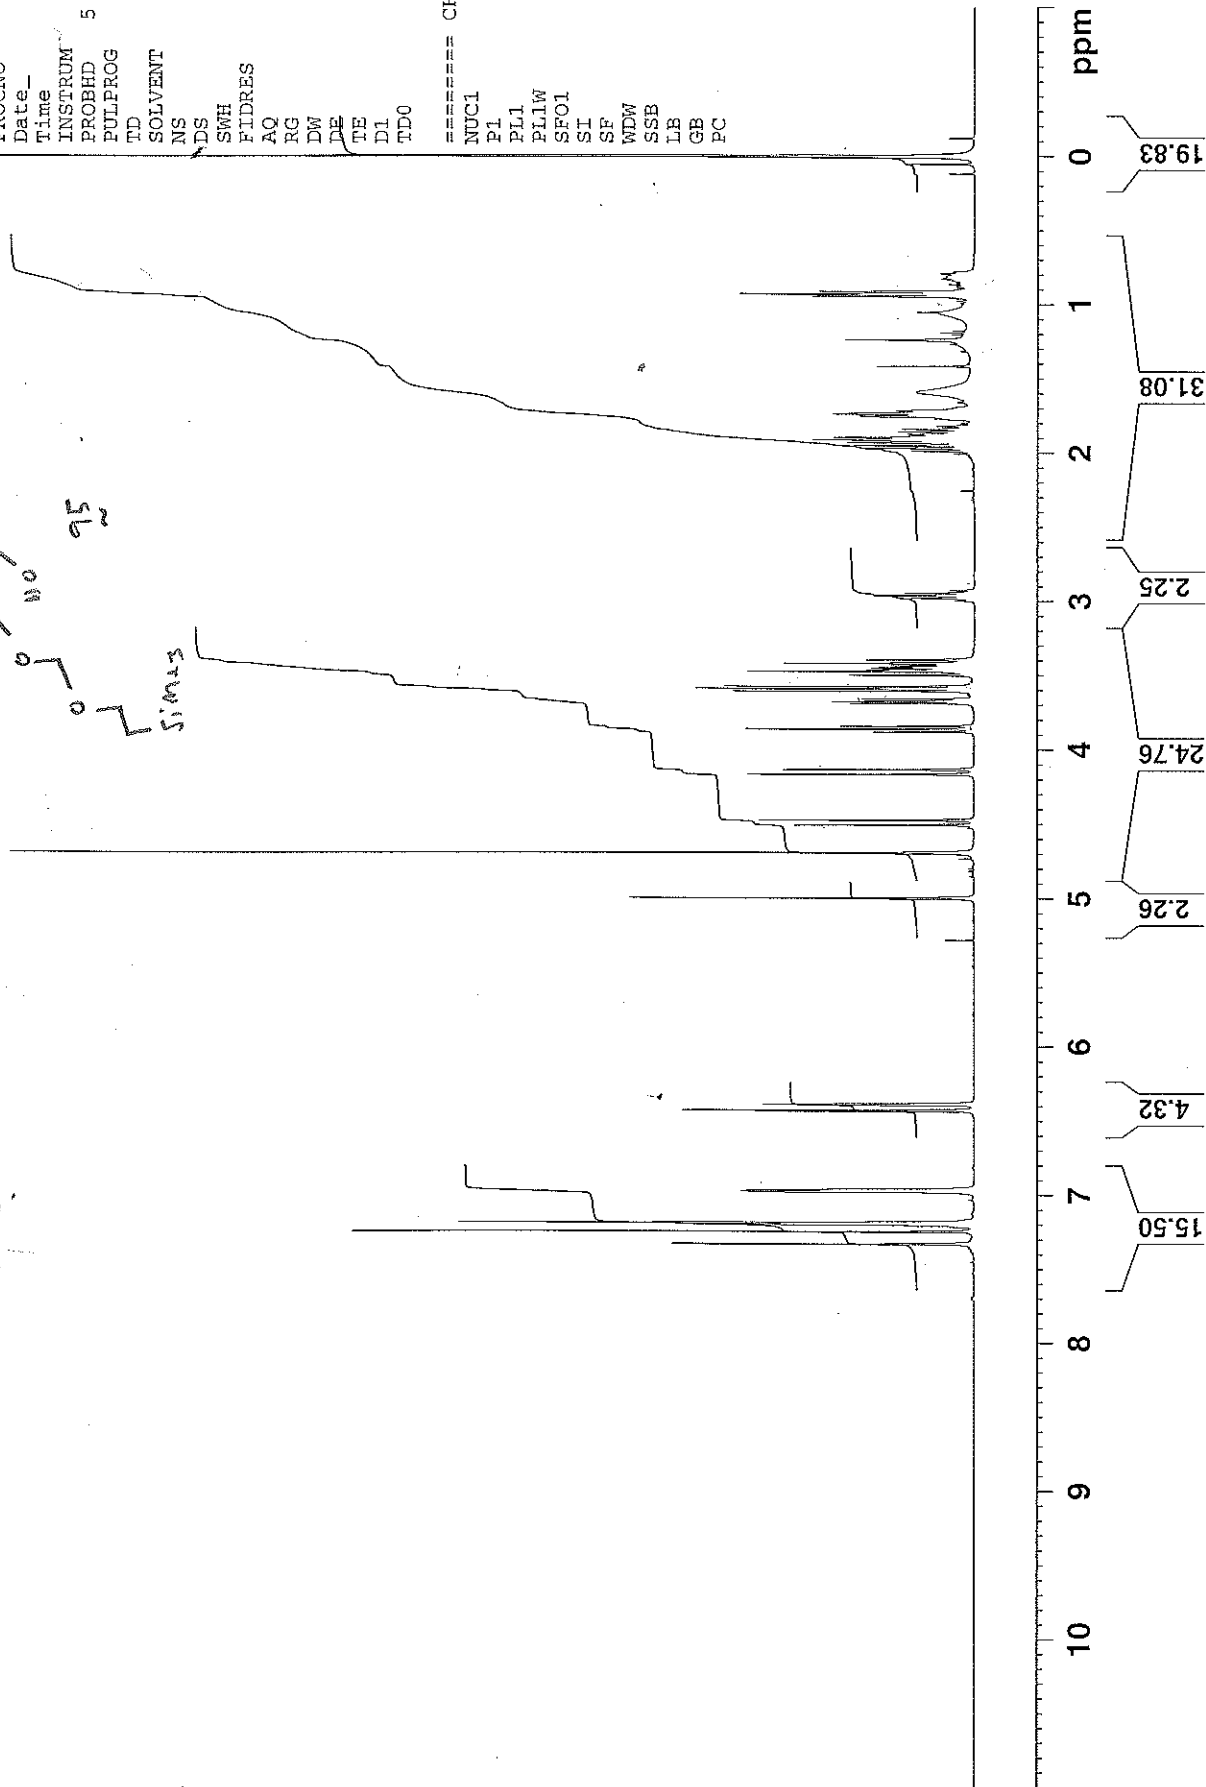



snee 441  
 mPROTONnight CDCl3 {e:\bruk400data\2009\May} ejt 54

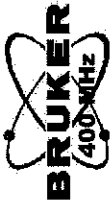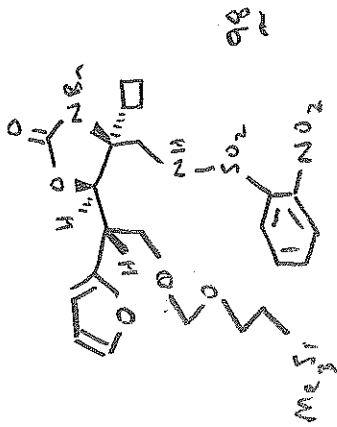

NAME 2009-05-07-ejt-54  
 EXPNO 10  
 PROCNO 1  
 Date\_ 20090508  
 Time 0.02  
 INSTRUM AV400  
 PROBED 5 mm FAPBO BB-  
 PULPROG zg30b  
 TD 65536  
 SOLVENT CDCl3  
 NS 16  
 DS 0  
 SWH 8264.463 Hz  
 FIDRES 0.126106 Hz  
 AQ 3.9649780 sec  
 RG 203  
 DW 60.500 usec  
 DE 9.40 usec  
 TE 295.8 K  
 D1 1.00000000 sec  
 TD0 1

===== CHANNEL f1 =====  
 NUC1 1H  
 P1 10.00 usec  
 PL1 -3.60 dB  
 PL1W 17.83863831 W  
 SF01 400.1324710 MHz  
 SI 32768  
 SF 400.1300181 MHz  
 WDW EM  
 SSB 0  
 LB 0.30 Hz  
 GB 0  
 PC 1.00

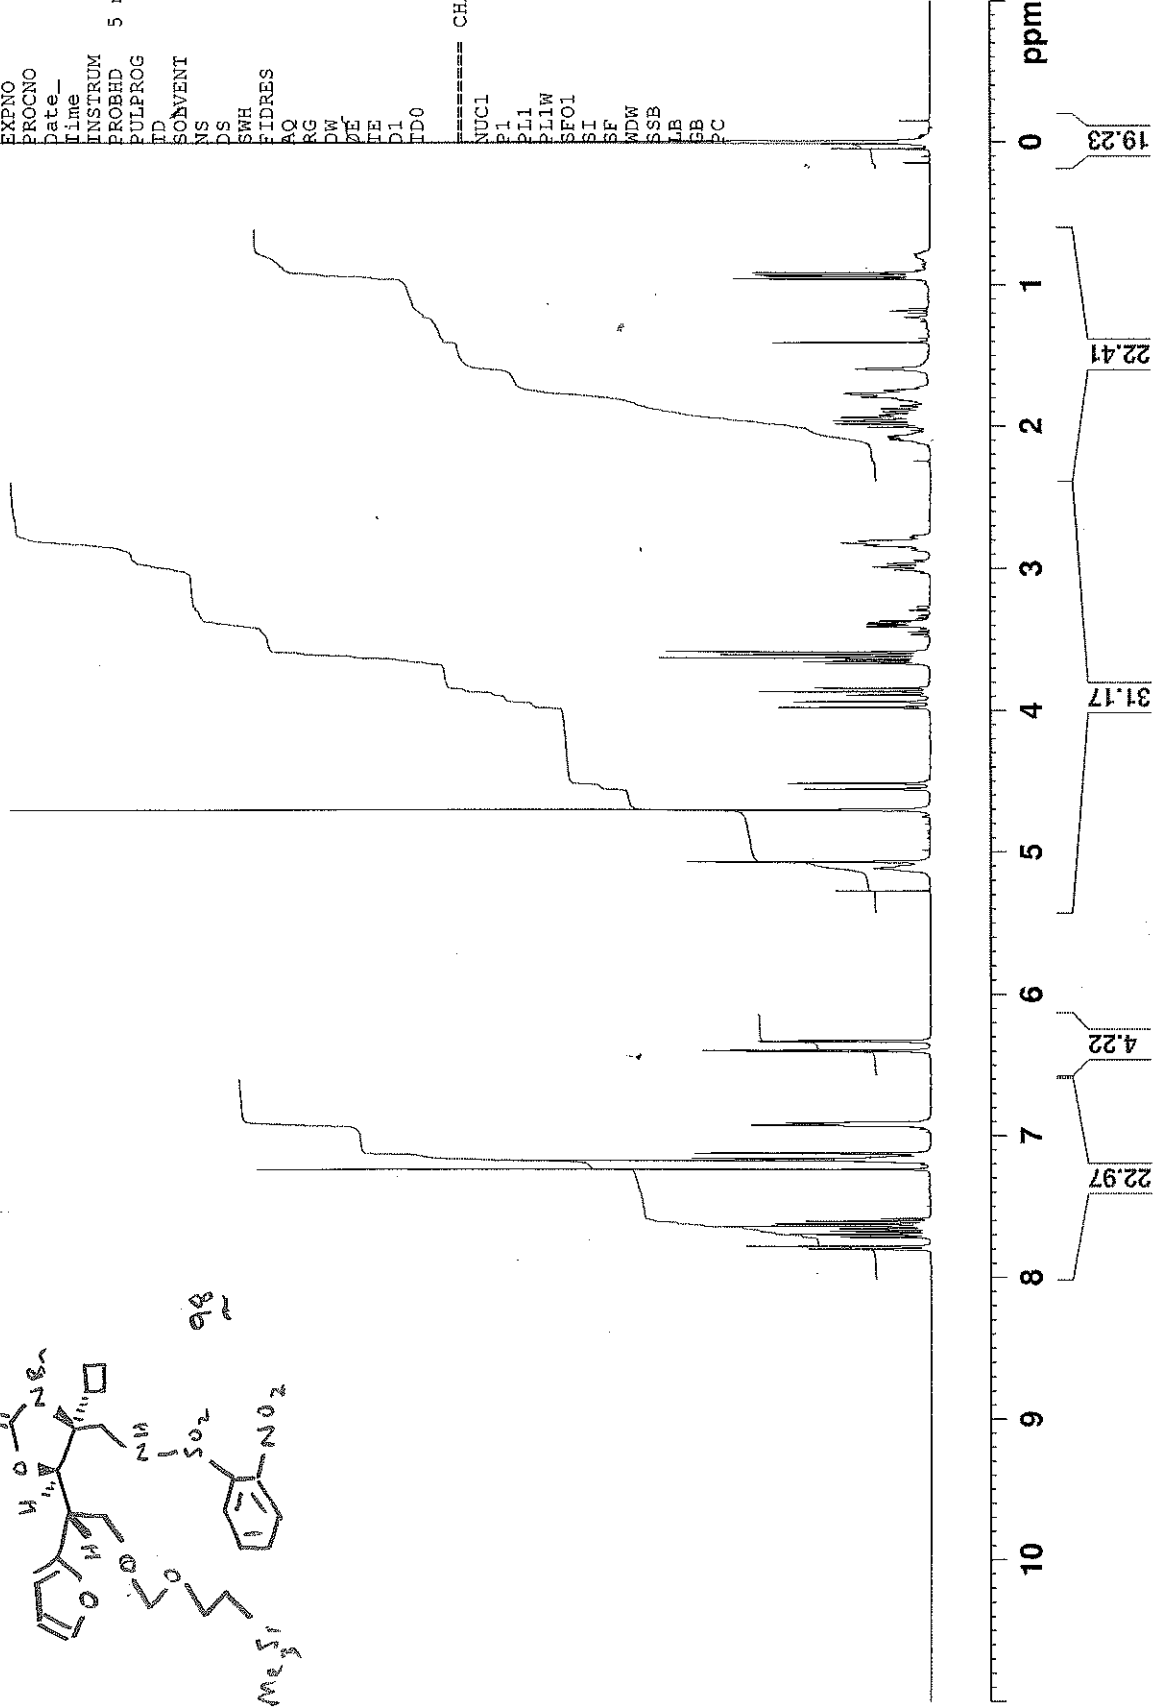

snee 441

mCARBONnight CDCI3 {e:\bruk400\data\2009\May} ejt 54

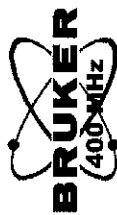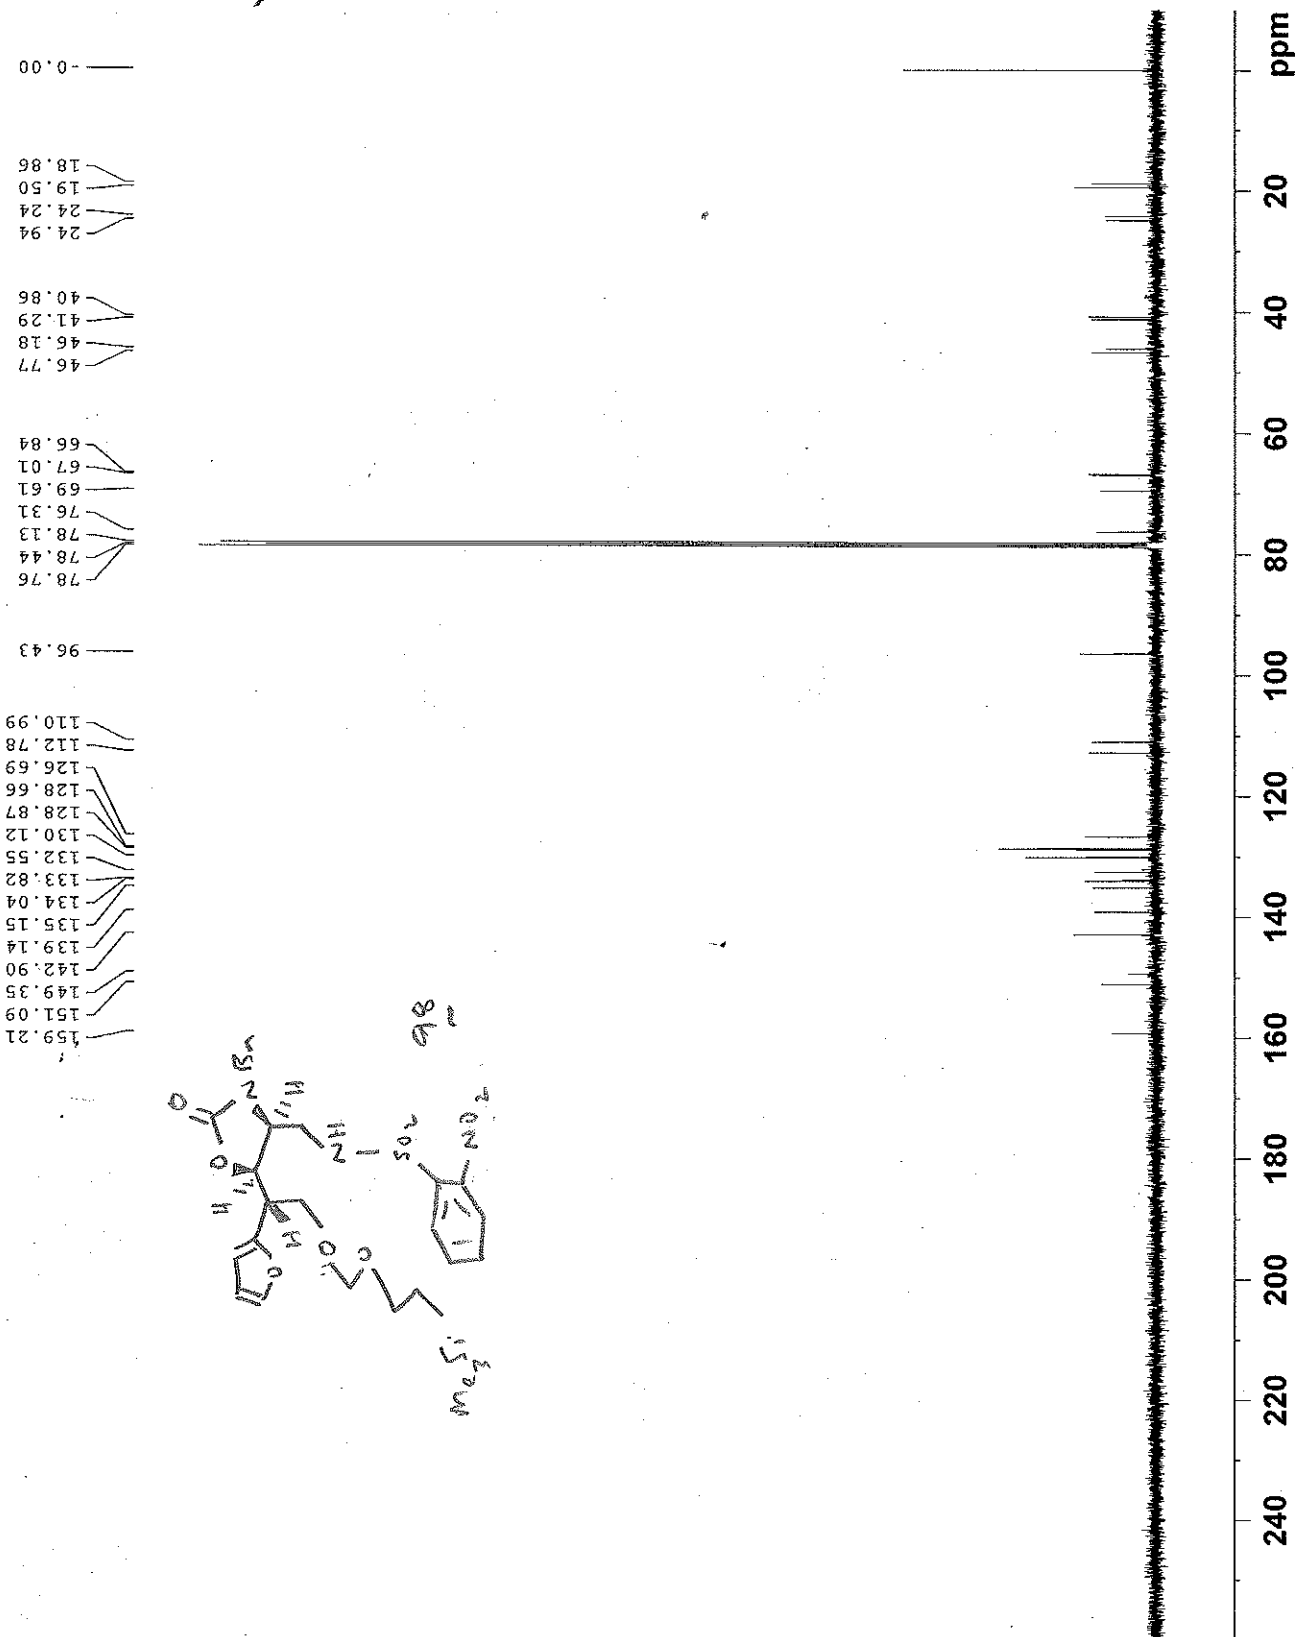

2009-05-07-ejt-54  
NAME EXPNO 11  
PROCNO 1  
Date\_ 20090508  
Time 0.16  
INSTRUM AV400  
PROBHD 5 mm PABBO BB-  
PULPROG zgpg30  
TD 65536  
SOLVENT CDCI3  
NS 256  
DS 2  
SWH 30241.936 Hz  
FIDRES 0.461455 Hz  
AQ 1.0835786 sec  
RG 512  
DW 16.533 usec  
DE 7.83 usec  
TE 296.3 K  
D1 2.00000000 sec  
D11 0.03000000 sec  
TDO 1

\*\*\*\*\* CHANNEL f1 \*\*\*\*\*  
NUC1 13C  
P1 8.00 usec  
PL1 0.00 dB  
PL1W 34.91522217 W  
SFO1 100.6241042 MHz

\*\*\*\*\* CHANNEL f2 \*\*\*\*\*  
CPDPRG2 waltz16  
NUC2 1H  
PCPD2 90.00 usec  
PL2 -3.60 dB  
PL12 15.31 dB  
PL13 18.00 dB  
PL12W 17.83863831 W  
PL13W 0.23927751 W  
SFO2 400.1316005 MHz  
SI 32768  
SF 100.6126270 MHz  
WDW EM  
SSB 0  
LB 1.00 Hz  
GB 0  
PC 1.40

snee 462 clean  
 mPROTONnight CDC13 /opt/bruk500data/2009/Jun ejt 52

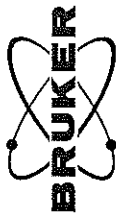

2009-06-08-ejt-52

NAME  
 EXPNO 10  
 PROCNO 1  
 Date\_ 20090608  
 Time 18.45  
 INSTRUM spect  
 PROBHD 5 mm TXI 1H/D-  
 PULPROG zg30b  
 TD 65536  
 SOLVENT CDC13  
 NS 64  
 DS 0  
 SWH 10330.578 Hz  
 FIDRES 0.157632 Hz  
 AQ 3.1719923 sec  
 RG 724  
 DW 48.400 usec  
 DE 13.38 usec  
 TE 294.3 K  
 D1 1.00000000 sec  
 TD0 1

==== CHANNEL f1 =====  
 NUC1 1H  
 P1 8.20 usec  
 PL1 3.25 dB  
 PL1W 12.12272263 W  
 SF01 500.1330885 MHz  
 SI 32768  
 SF 500.1300470 MHz  
 WDW EM  
 SSB 0  
 LB 0.30 Hz  
 GB 0  
 PC 1.00

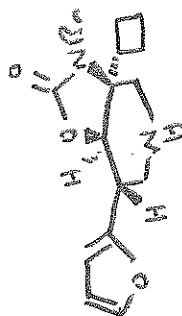

100

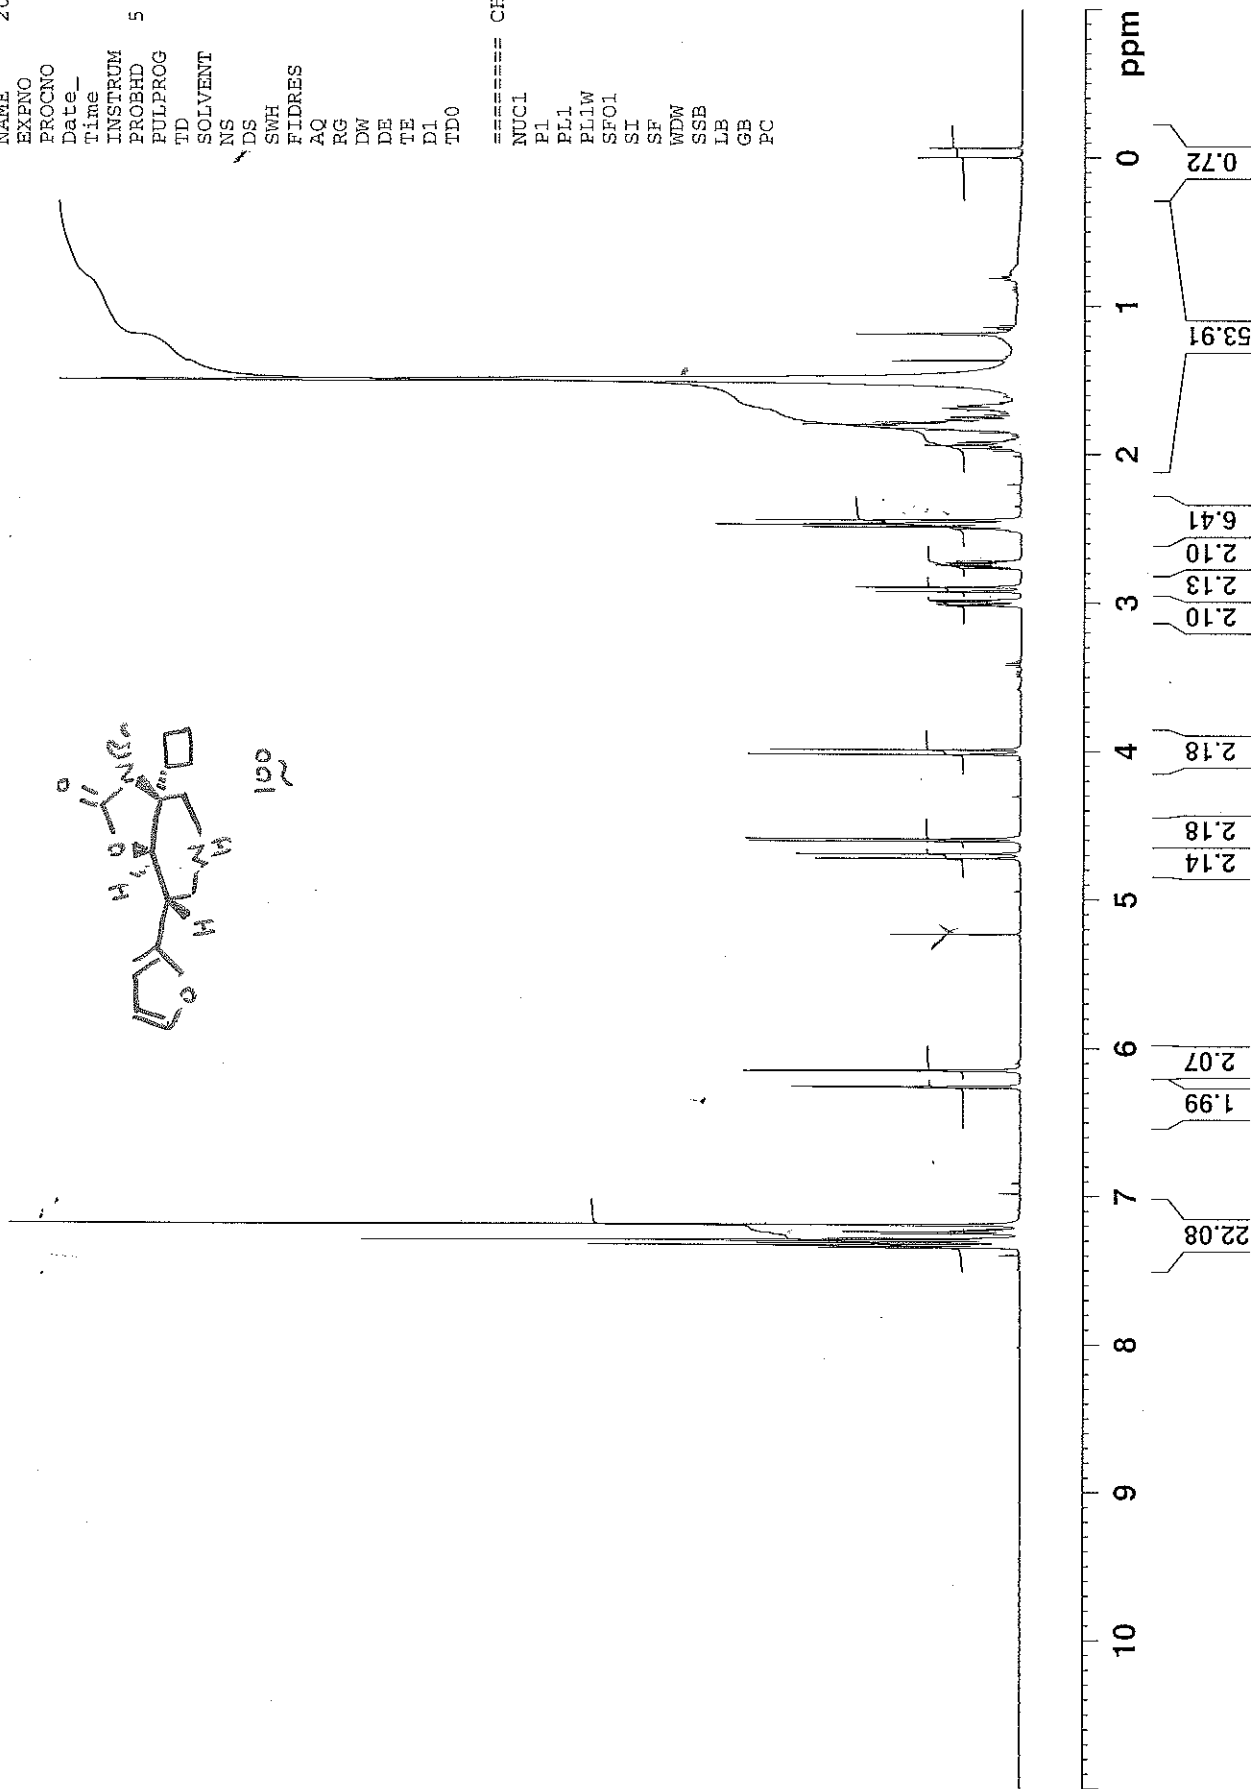

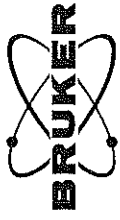

snee 436 rf 0.53  
mPROTONight CDC13 /opt/bruk500data/2009/Apr ejt 17

2009-05-05-ejt-17  
10  
1  
20090505  
19.55  
SPECT  
5 mm TXI IH/D-  
zg30b  
65536  
CDC13  
16  
0  
10330.578 Hz  
0.157632 Hz  
3.1719923 sec  
90.5  
48.400 usec  
13.38 usec  
296.6 K  
1.00000000 sec  
1

===== CHANNEL f1 =====  
NUC1 1H  
P1 8.20 usec  
PL1 3.25 dB  
PL1W 12.12272363 W  
SFO1 500.1330885 MHz  
SI 32768  
SF 500.1300056 MHz  
WDW EM  
SSB 0  
LB 0.30 Hz  
GB 0  
PC 1.00

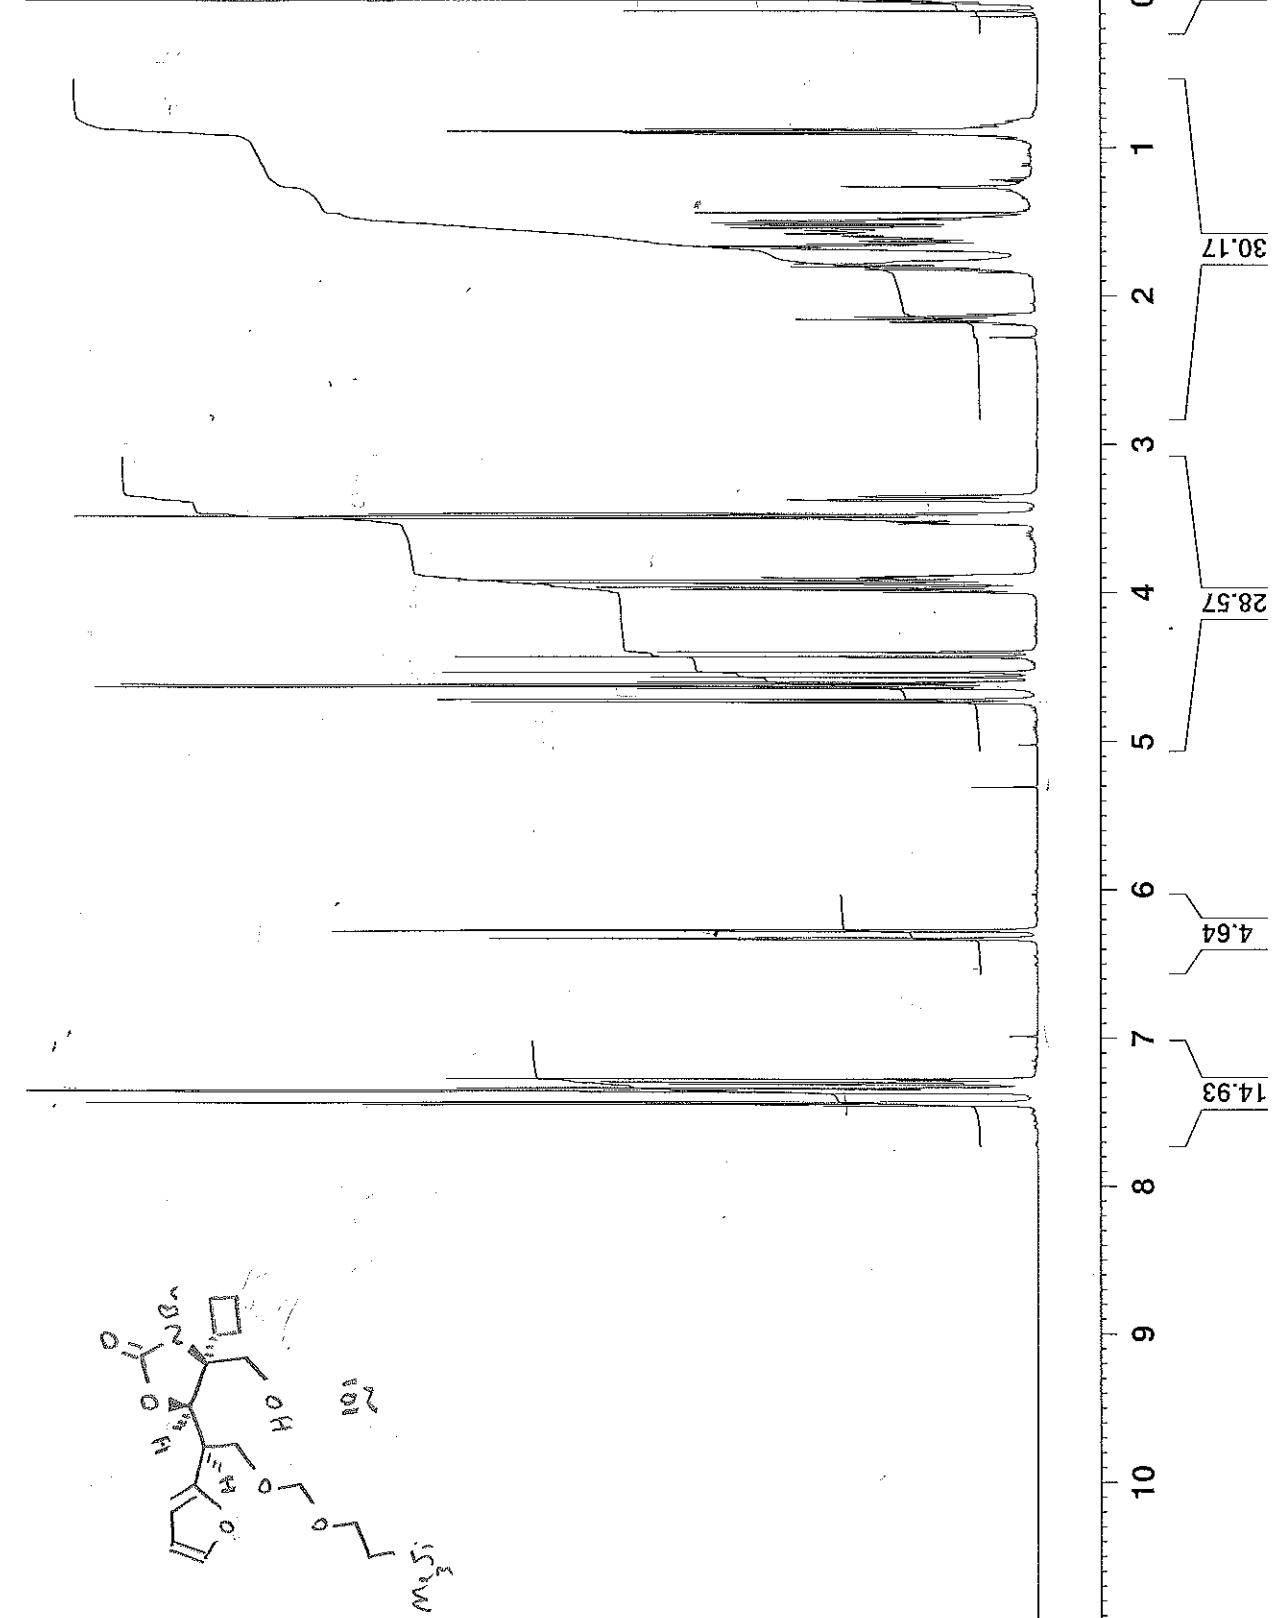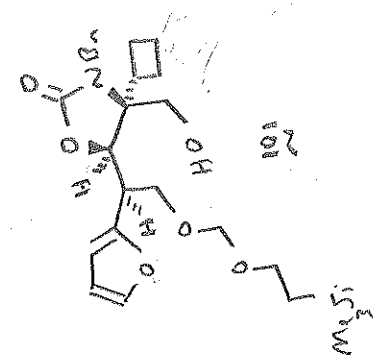

snee 436 rf 0.53

mCARBONnight CDCI3 /opt/bruk500data/2009/Apr ejt 17

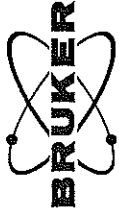

2009-05-05-ejt-17  
NAME EXPNO 11  
PROCNO 1  
Date\_ 20090505  
Time 20.09  
INSTRUM spect  
PROBHD 5 mm TXI 1H/D-  
PULPROG zgpg30  
TD 65536  
SOLVENT CDCI3  
NS 256  
DS 2  
SWH 29761.904 Hz  
FIDRES 0.454131 Hz  
AQ 1.1010548 sec  
RG 512  
DW 16.800 usec  
DE 32.21 usec  
TE 296.9 K  
D1 2.00000000 sec  
D11 0.03000000 sec  
TDO 1

==== CHANNEL f1 =====  
NUC1 13C  
F1 11.50 usec  
PL1 -4.20 dB  
PL1W 218.02882385 W  
SF01 125.7703643 MHz

==== CHANNEL f2 =====  
CPDPRG2 waltz16  
NUC2 1H  
F1 80.00 usec  
PL2 4.20 dB  
PL12 23.99 dB  
PL13 23.00 dB  
PL12W 9.74092484 W  
PL12W 0.10223514 W  
PL13W 0.12841040 W  
SF02 500.1320005 MHz  
SI 32768  
SF 125.7576125 MHz  
WDW EM  
SSB 0  
LB 1.00 Hz  
GB 0  
PC 1.40

160.15  
154.08  
142.82  
139.80  
130.35  
129.30  
129.22  
112.20  
109.85  
96.29  
78.70  
78.45  
78.26  
78.20  
70.23  
69.18  
66.44  
61.51  
46.58  
40.77  
40.00  
24.33  
23.92  
19.39  
18.66  
-0.00

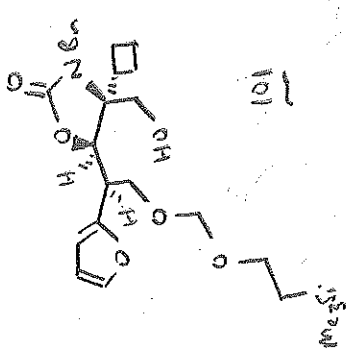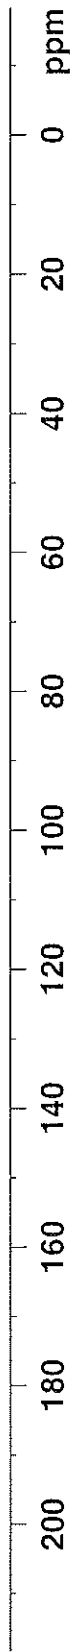

snee 485  
mPROTONight CDCI3 /opt/bruk500data/2009/Jul ejt 17

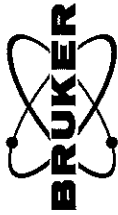

2009-07-20-ejt-17

NAME  
EXENO 10  
PROCNO 1  
Date\_ 20090720  
Time 18.47  
INSTRUM spect  
PROBHD 5 mm TXI IH/D-  
PULPROG zg30b  
TD 65536  
SOLVENT CDCl3  
NS 16  
DS 0  
SWH 10330.578 Hz  
FIDRES 0.157632 Hz  
AQ 3.1719923 sec  
RG 203  
DW 48.400 usec  
DE 13.38 usec  
TE 294.2 K  
D1 1.00000000 sec  
TD0 1

==== CHANNEL f1 =====  
NUC1 1H  
P1 8.20 usec  
PL1 3.25 dB  
PL1W 12.12272263 W  
SFO1 500.1330885 MHz  
SI 32768  
SF 500.1300100 MHz  
WDW EM  
SSB 0  
LB 0.30 Hz  
GB 0  
PC 1.00

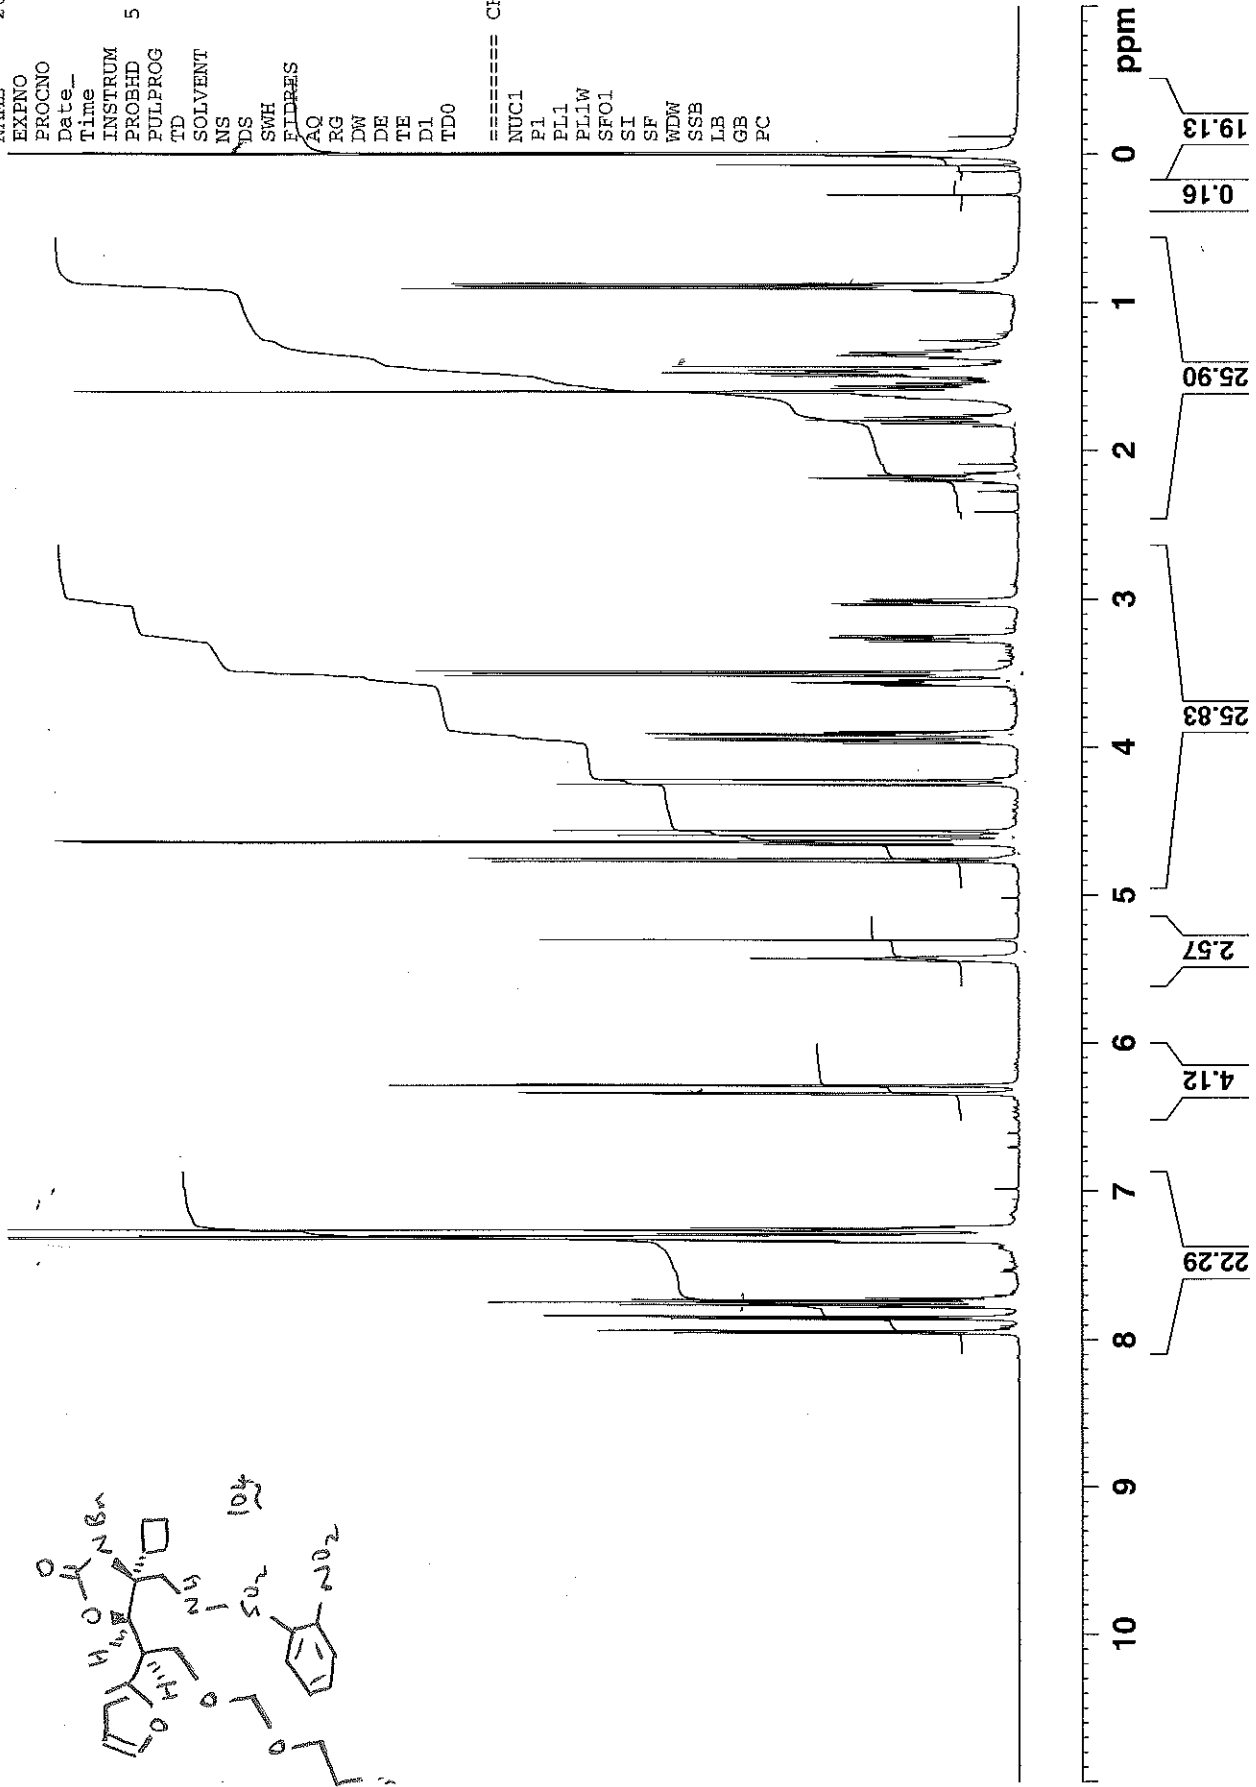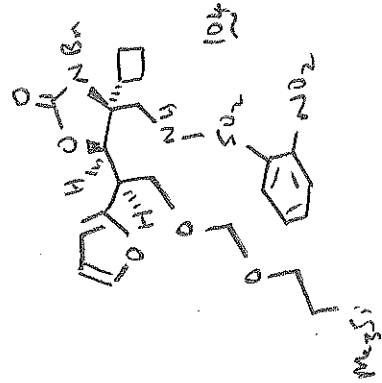



snee 485  
mCARBONnight CDCI3 /opt/bruk500data/2009/Jul ejt 17

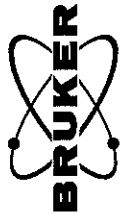

```

2009-07-20-ejt-17
NAME      EXPNO      PROCNO      Date_      Time
PROBHD    5 mm TXI  1H/D-      20090720   19.09
PULPROG   zgpg30
TD         65536
SOLVENT   CDCl3
NS         256
DS         2
SWH        29761.904 Hz
FIDRES     0.454131 Hz
AQ         1.1010548 sec
RG         512
DE         16.800 usec
TE         294.5 K
D1         2.00000000 sec
D11        0.03000000 sec
TD0        1
  
```

```

===== CHANNEL f1 =====
NUC1       13C
P1         11.50 usec
PL1        -4.20 dB
PL1W       218.0282385 W
SFO1       125.7703643 MHz
  
```

```

===== CHANNEL f2 =====
CPDPRG2   waltz16
NUC2       1H
PCPD2     80.00 usec
PL2        4.20 dB
PL12       23.99 dB
PL13       23.00 dB
PL12W     9.74092484 W
PL12W     0.10223514 W
PL13W     0.12841040 W
SFO2       500.1320005 MHz
SI         32768
SF         125.7576135 MHz
WDW        EM
SSB        0
LB         1.00 Hz
GB         0
PC         1.40
  
```

159.33  
153.09  
149.50  
143.16  
139.22  
135.33  
134.18  
134.11  
132.45  
130.22  
129.08  
128.99  
126.83  
112.45  
110.01  
96.32  
78.68  
78.43  
78.18  
77.99  
68.82  
66.62  
46.73  
44.46  
40.72  
40.28  
24.13  
24.04  
19.39  
18.04  
-0.00

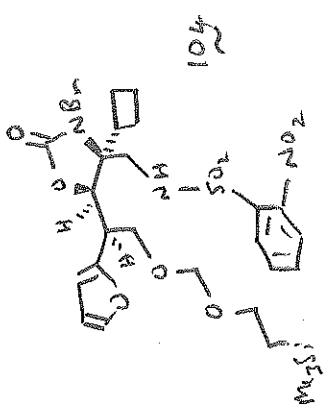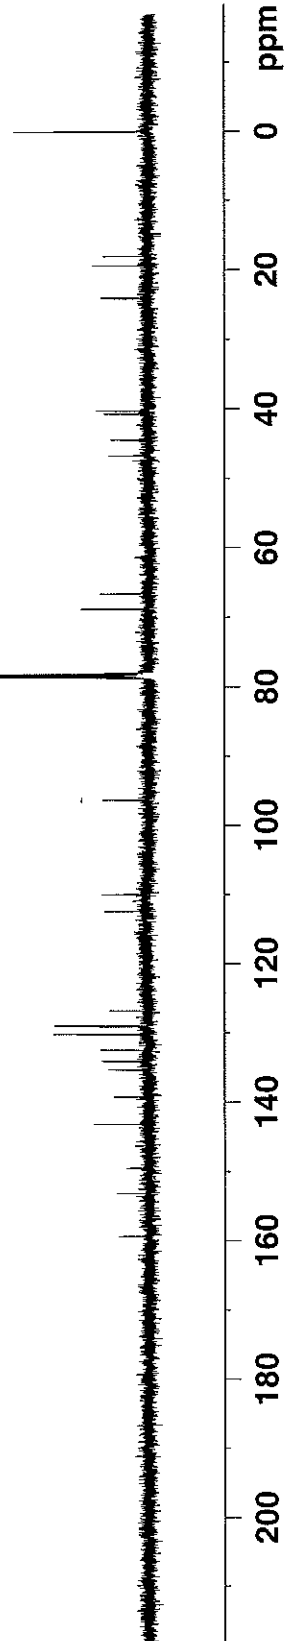

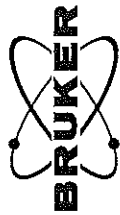

2009-06-01-ejt-56  
 NAME  
 EXPNO 10  
 PROCNO 1  
 Date\_ 20090601  
 Time 17.05  
 INSTRUM spect  
 PROBHD 5 mm TXI 1H/D-  
 PULPROG zg30b  
 TD 65336  
 SOLVENT CDCl3  
 NS 32  
 DS 0  
 SWH 10330.578 Hz  
 FIDRES 0.157632 Hz  
 AQ 3.1719923 sec  
 RG 256  
 DW 48.400 usec  
 DE 13.38 usec  
 TE 291.8 K  
 D1 1.00000000 sec  
 TD0 1

==== CHANNEL f1 =====  
 NUC1 1H  
 P1 8.20 usec  
 PL1 3.25 dB  
 PL1W 12.12272263 W  
 SF01 500.1330885 MHz  
 SI 32768  
 SF 500.1300122 MHz  
 WDW EM  
 SSB 0  
 LB 0.30 Hz  
 GB 0  
 PC 1.00

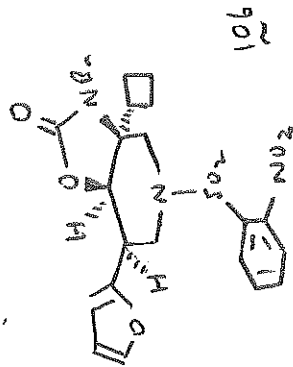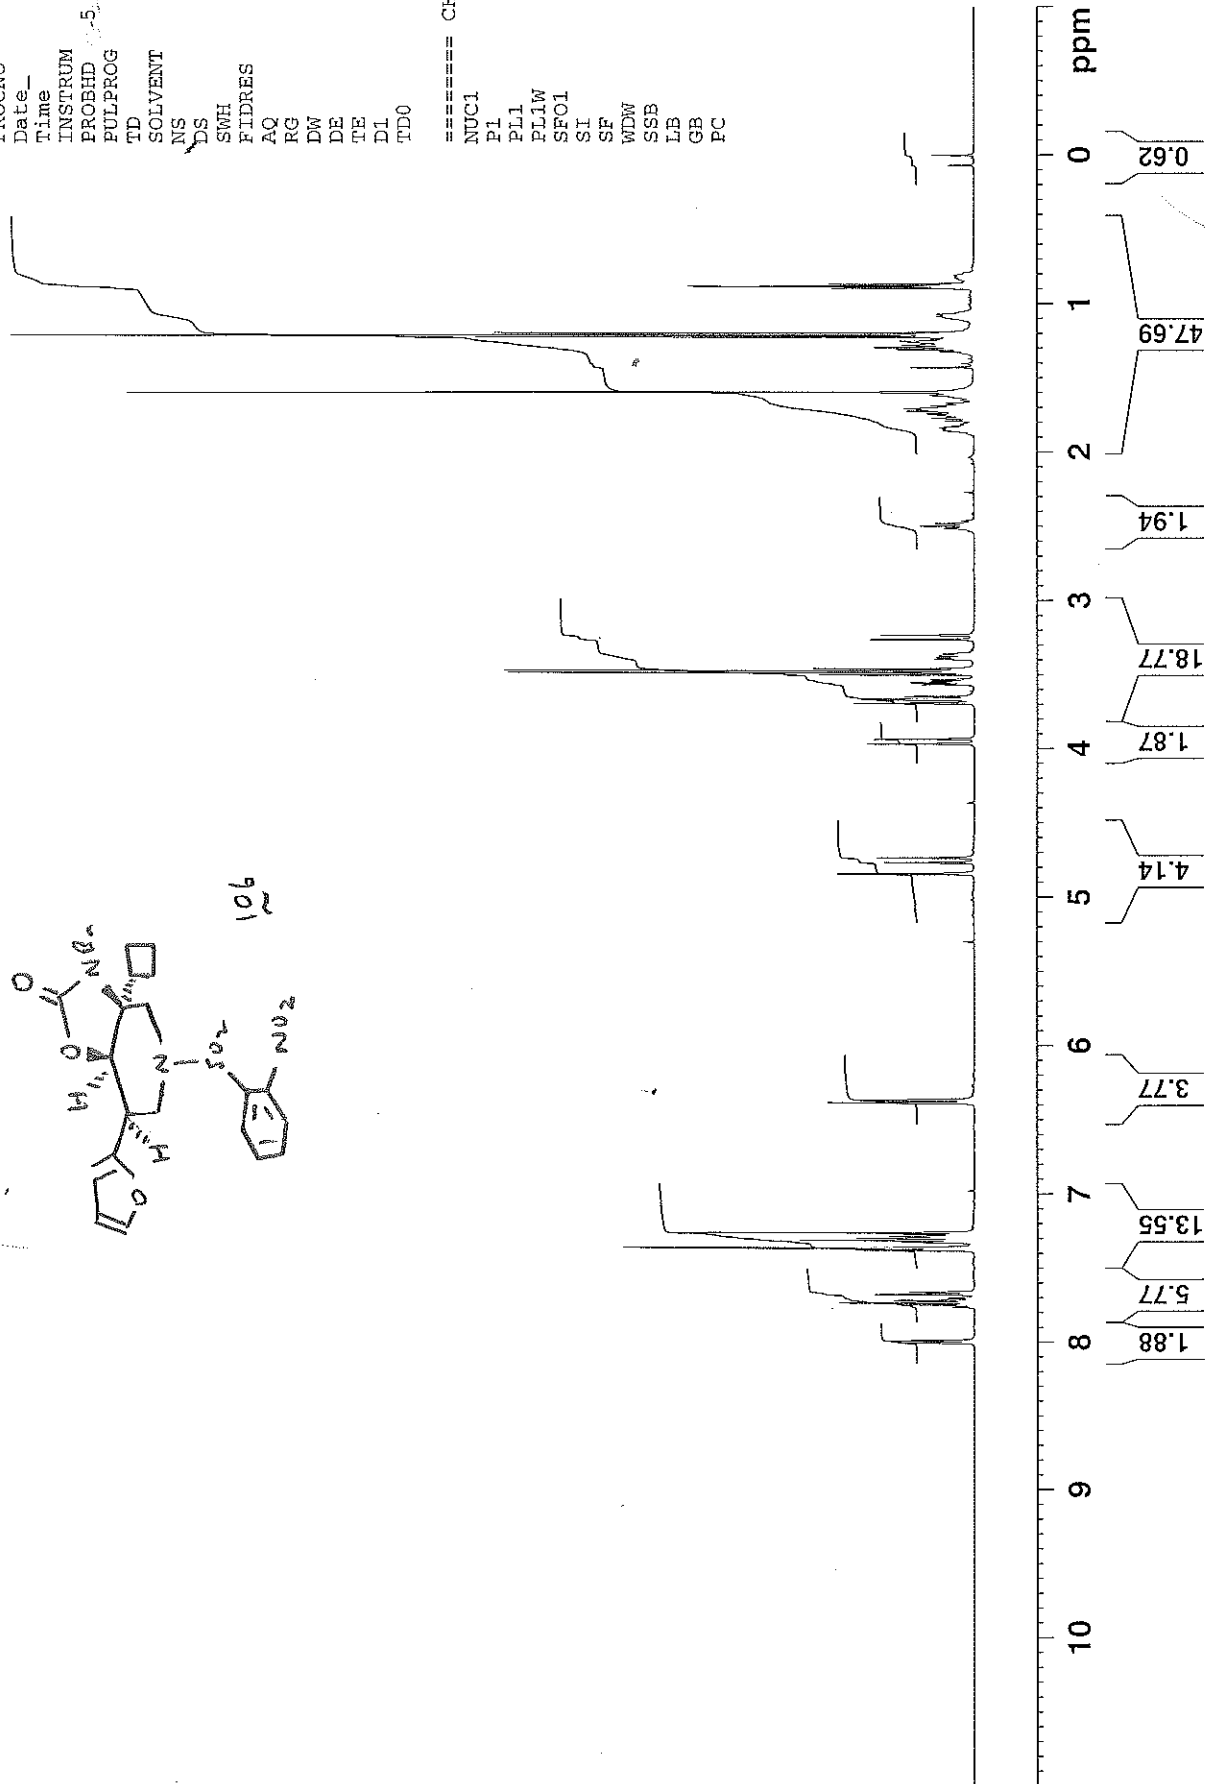

Maxime BUFFAT  
MB.8.775.BB  
CDCl3  
proton 300MHZ  
Inova 300  
porthos  
25.06.03

Pulse Sequence: s2pul

Solvent: cdcl3  
Ambient temperature  
File: MB.8.777.BB-300H-25.06.03  
INOVA-300 "porthos"

Relax. delay 5.000 sec  
Pulse 58.1 degrees  
Acq. time 3.636 sec  
Width 4506.0 Hz  
96 repetitions  
OBSERVE H1, 300.1031975 MHz  
DATA PROCESSING  
Line broadening 0.3 Hz  
FT size 65536  
Total time 13 min, 49 sec

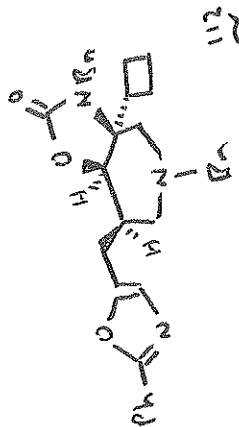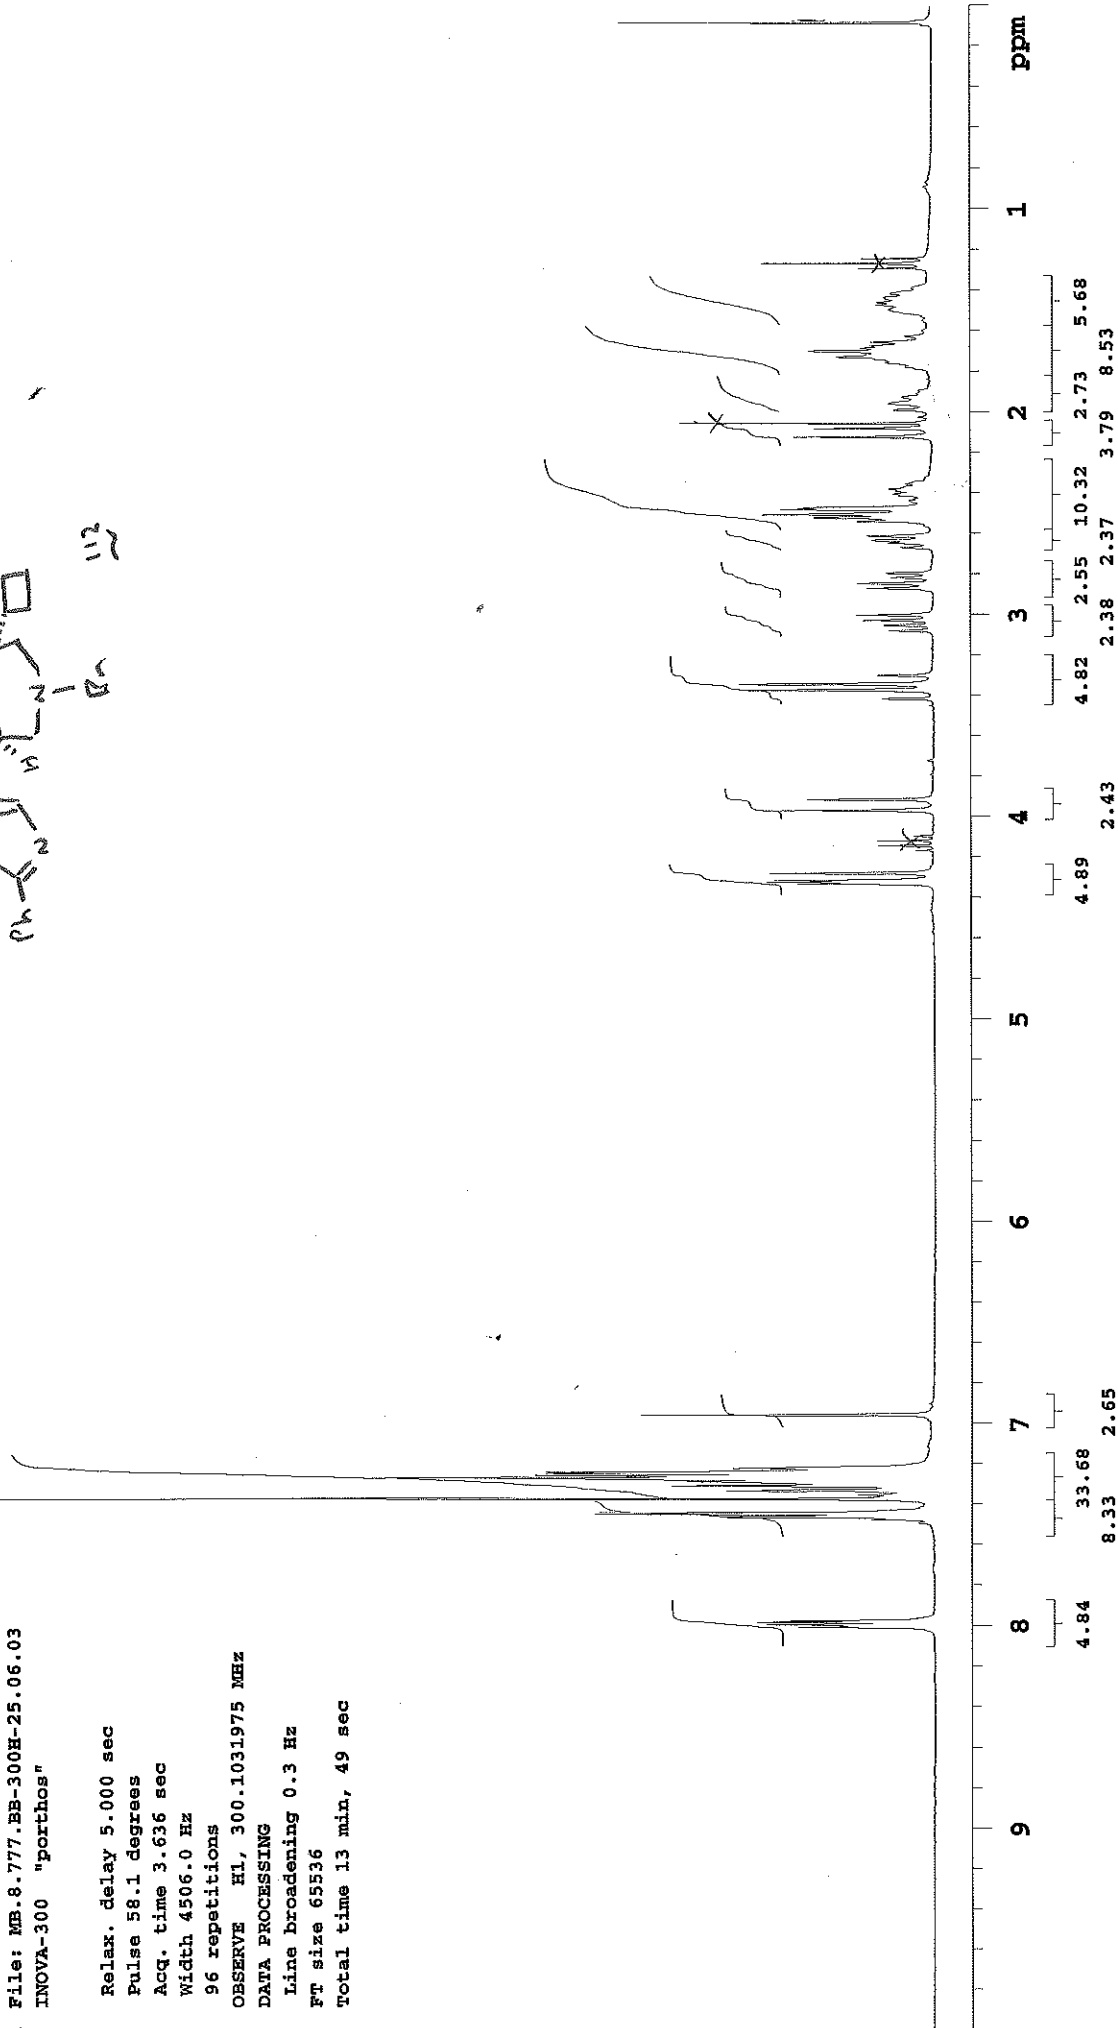

Maxime BUFFAT  
 MB.8.775.EB  
 CDC13  
 13C 75MHz  
 Inova 300  
 porthos  
 25.06.03

Pulse Sequence: s2pul

Solvent: cdcl3  
 Ambient temperature  
 File: MB.8.777.BB-300C-25.06.03  
 INOVA-300 "porthos"

Relax. delay 2.000 sec  
 Pulse 45.0 degrees  
 Acq. time 1.813 sec  
 Width 20000.0 Hz  
 9498 repetitions  
 OBSERVE C13, 75.4610124 MHz  
 DECOUPLE H1, 300.1046968 MHz  
 Power 43 dB  
 continuously on  
 WALTZ-16 modulated  
 DATA PROCESSING  
 Line broadening 1.0 Hz  
 FT size 131072  
 Total time 21 hr, 13 min, 56 sec

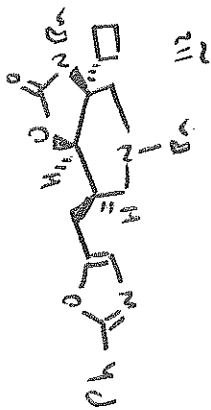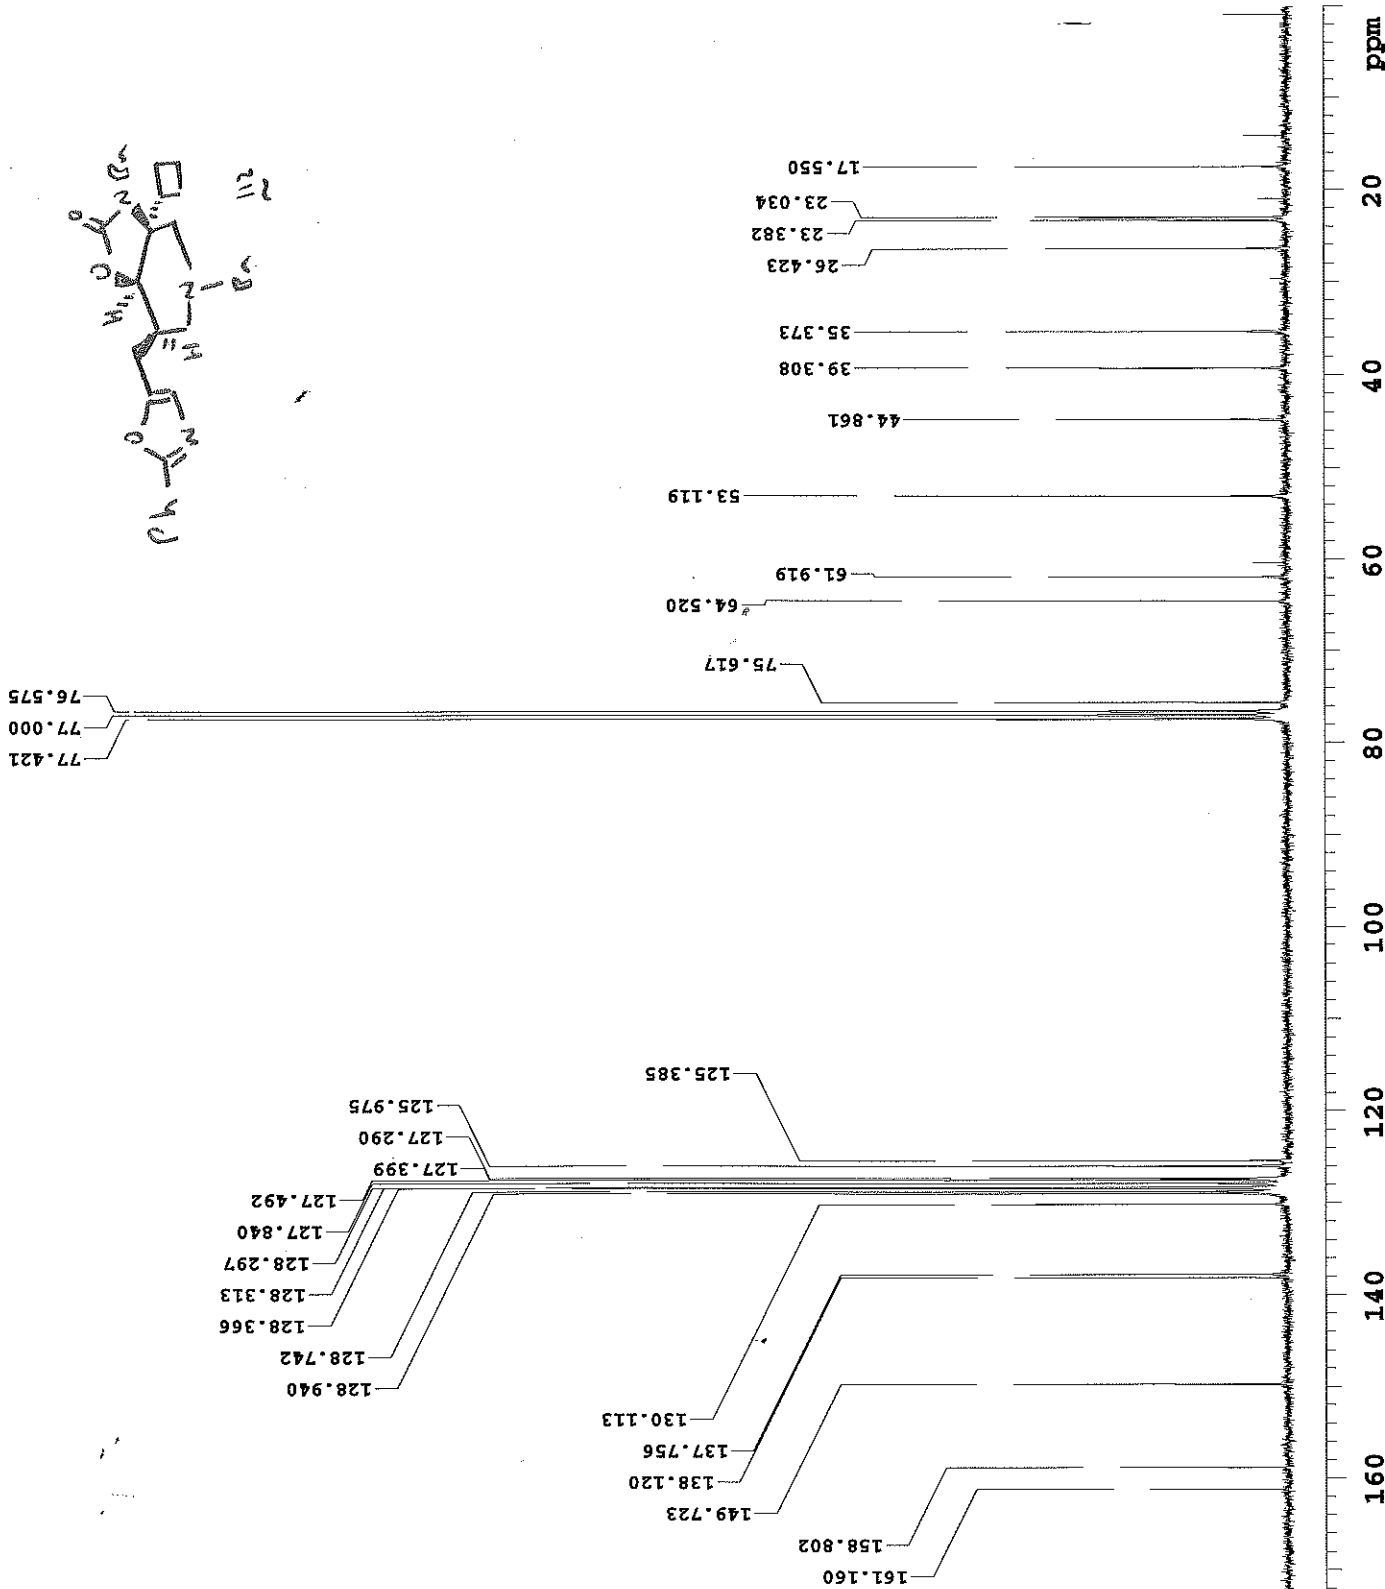

Maxime BUFFAN  
MB-8.775.BB  
CDC13  
13C 75MHz  
Inova 300  
perthos  
25.06.03

Pulse Sequence: s2pul

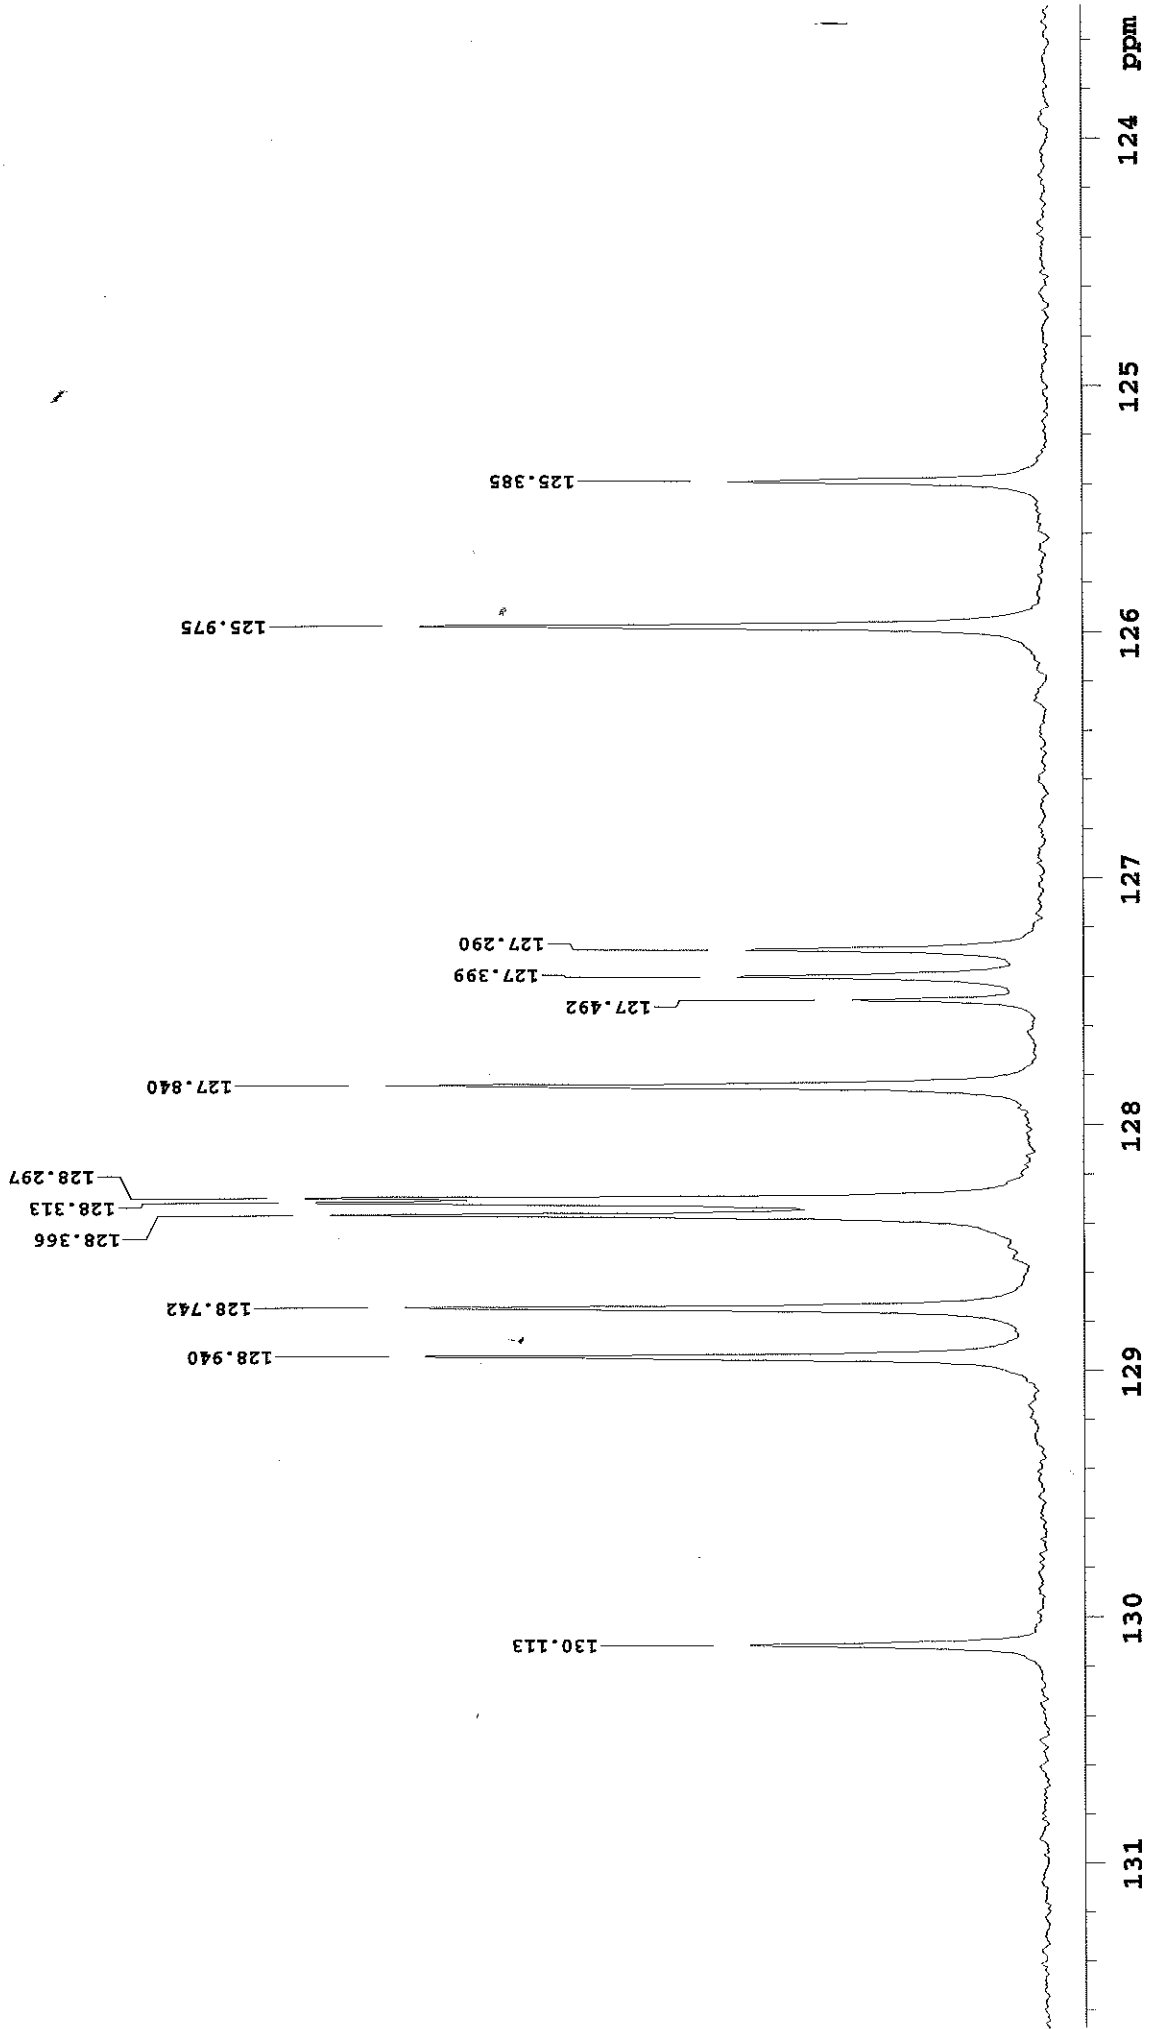

Maxime BUFFAT  
MB.8.777.D  
cdcl3  
Inova 400 (MB)  
Aramis  
Proton 400MHz  
28.06.03

Pulse Sequence: s2pul

Solvent: cdcl3  
Ambient temperature  
User: 1-12-87

File: MB.8.777.D-400H-28.06.03  
INOVA-300 "porthos"

Relax. delay 5.000 sec  
Pulse 36.0 degrees  
Acq. time 4.008 sec  
Width 6387.7 Hz  
256 repetitions

OBSERVE H1, 399.9584369 MHz

DATA PROCESSING

Line broadening 0.2 Hz

FT size 65536

Total time 38 min, 28 sec

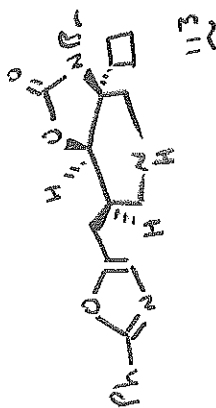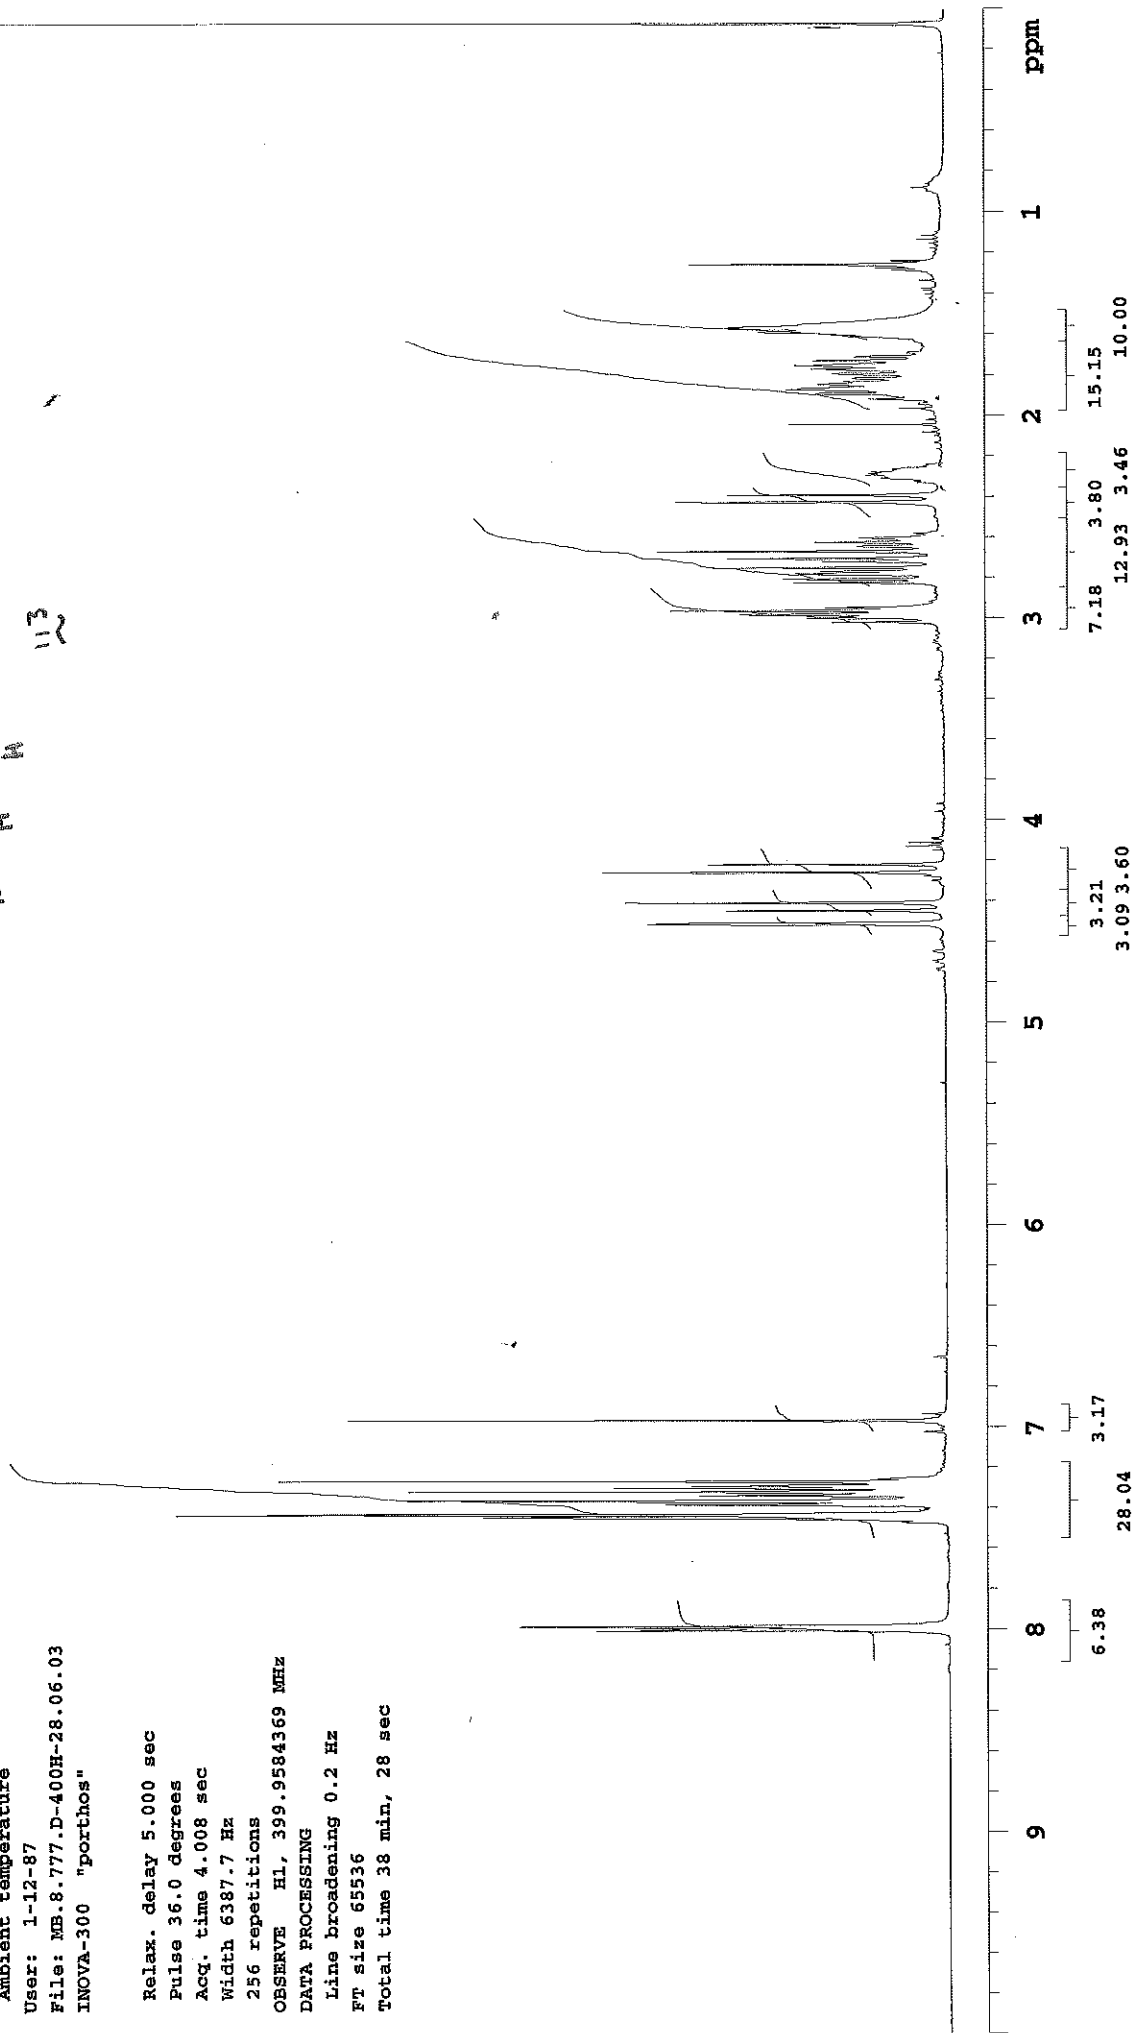

Maxime BUFFAT  
 MB.8.777.D  
 cdcl3  
 Inova 400 (MB)  
 Aramis  
 13C 100MHz  
 28.06.03

Pulse Sequence: s2pul

Solvent: cdcl3  
 Ambient temperature  
 File: MB.8.777.D-400C-28.06.03  
 INOVA-300 "porthos"

Relax. delay 2.000 sec  
 Pulse 36.0 degrees  
 Acq. time 1.311 sec  
 Width 25000.0 Hz  
 40000 repetitions  
 OBSERVE C13, 100.5696317 MHz  
 DECOUPLE H1, 399.9597752 MHz  
 Power 38 dB  
 continuously on  
 WALTZ-16 modulated  
 DATA PROCESSING  
 Line broadening 1.0 Hz  
 FT size 65536  
 Total time 36 hr, 53 min, 2 sec

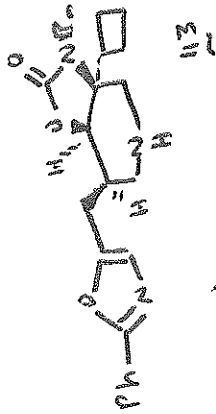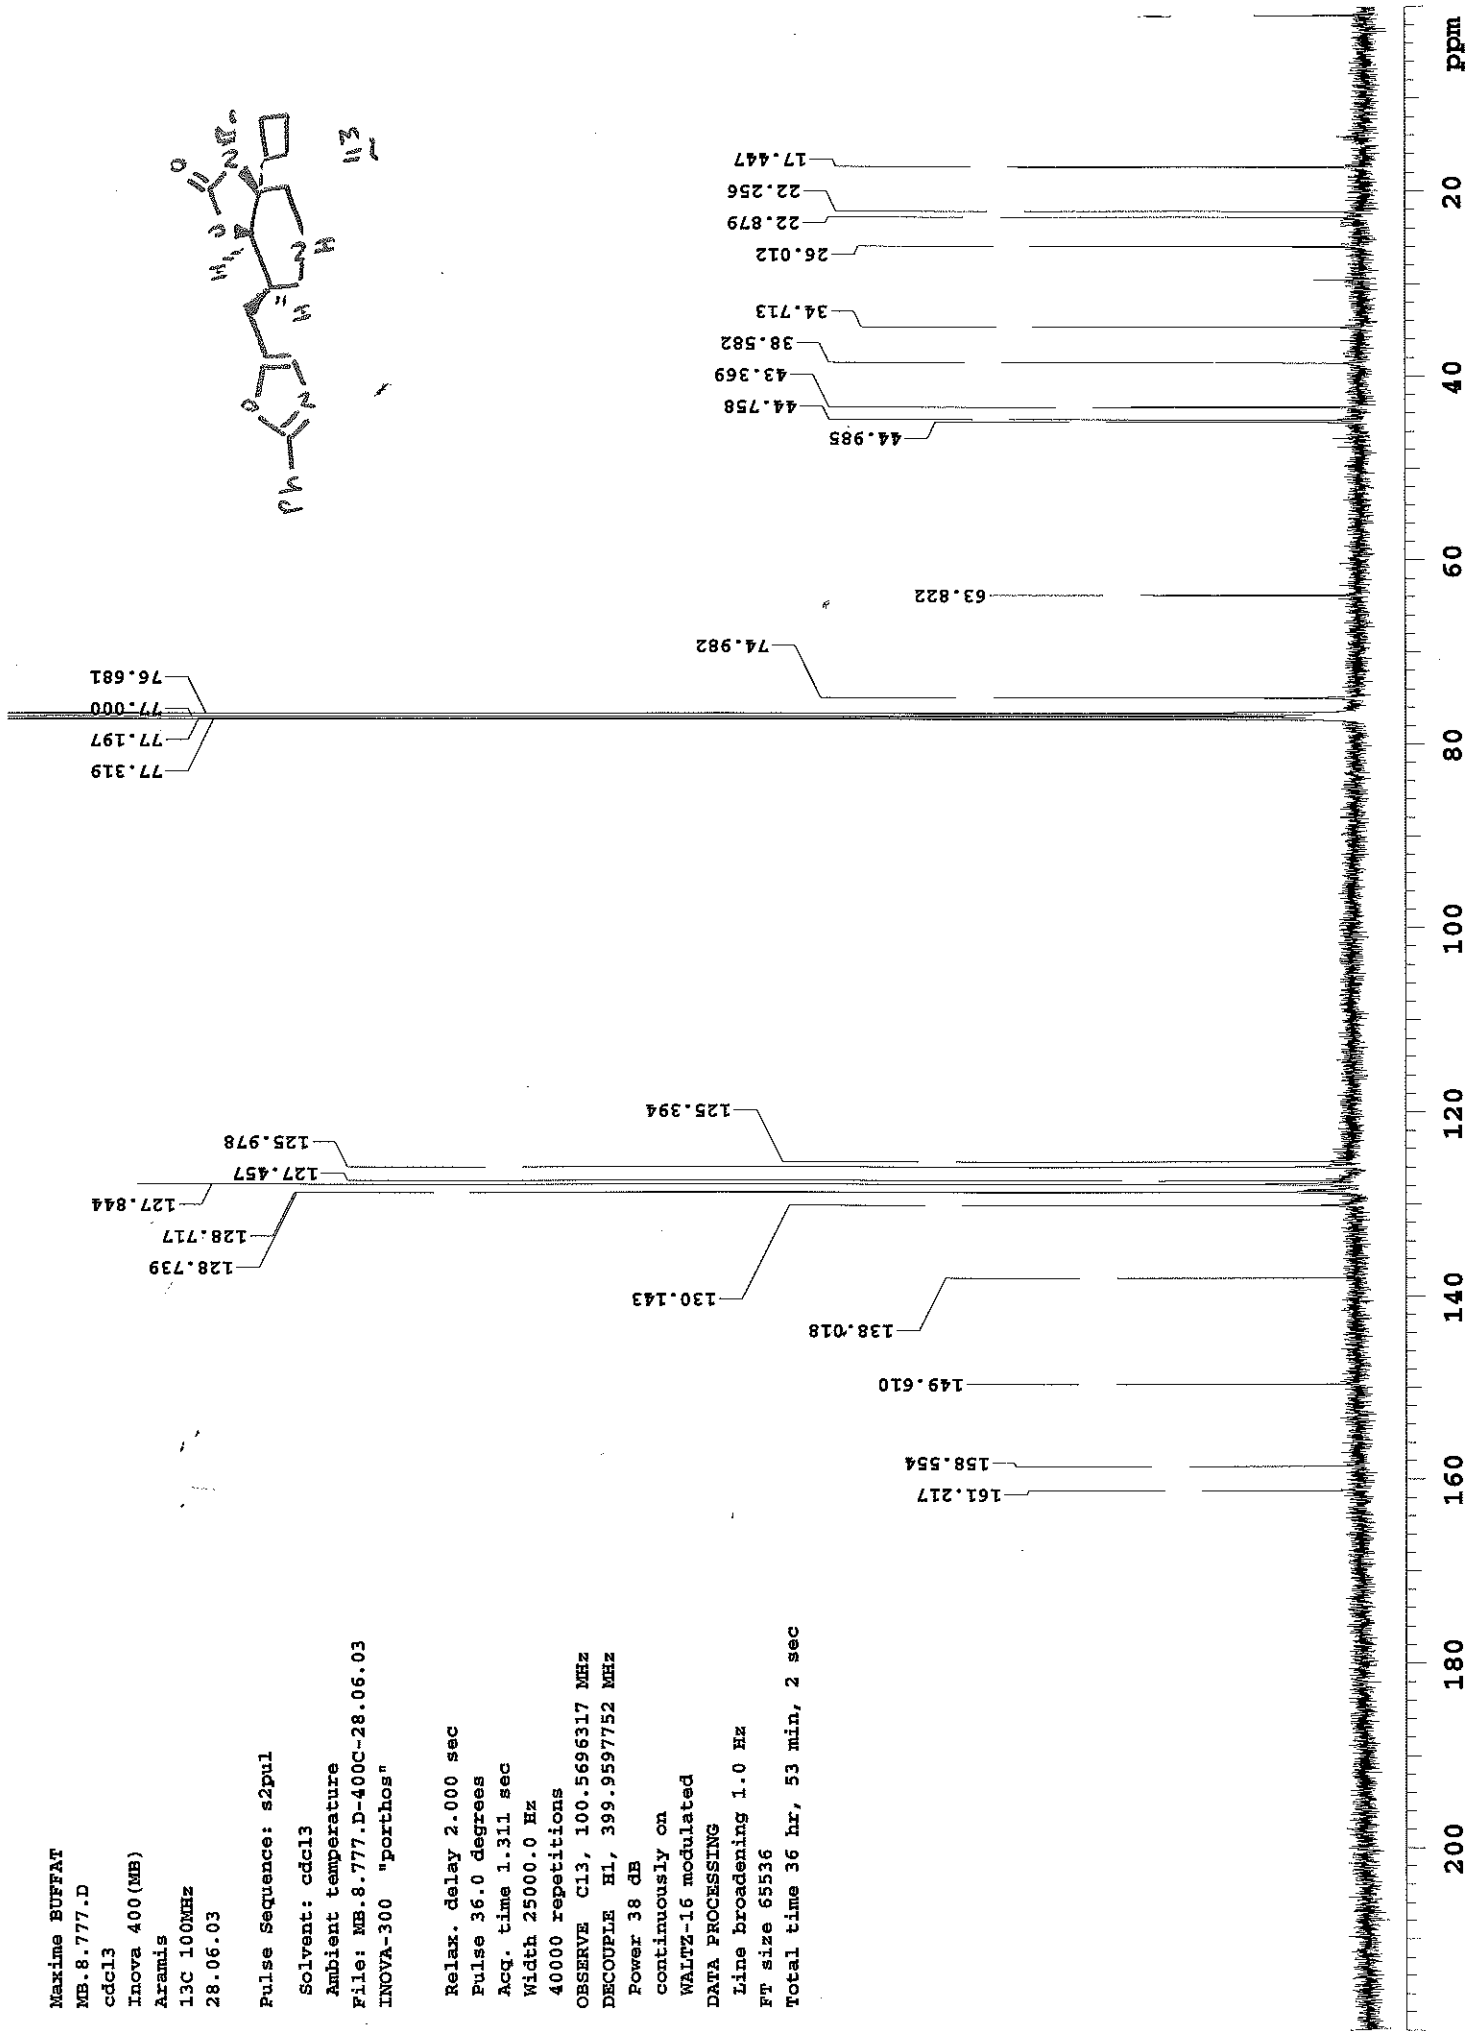

Maxime BUFFAT  
MB.8.777.D  
cdcl3  
Inova 400(MB)  
Aramis  
13C 100MHz  
28.06.03

Pulse Sequence: s2pul

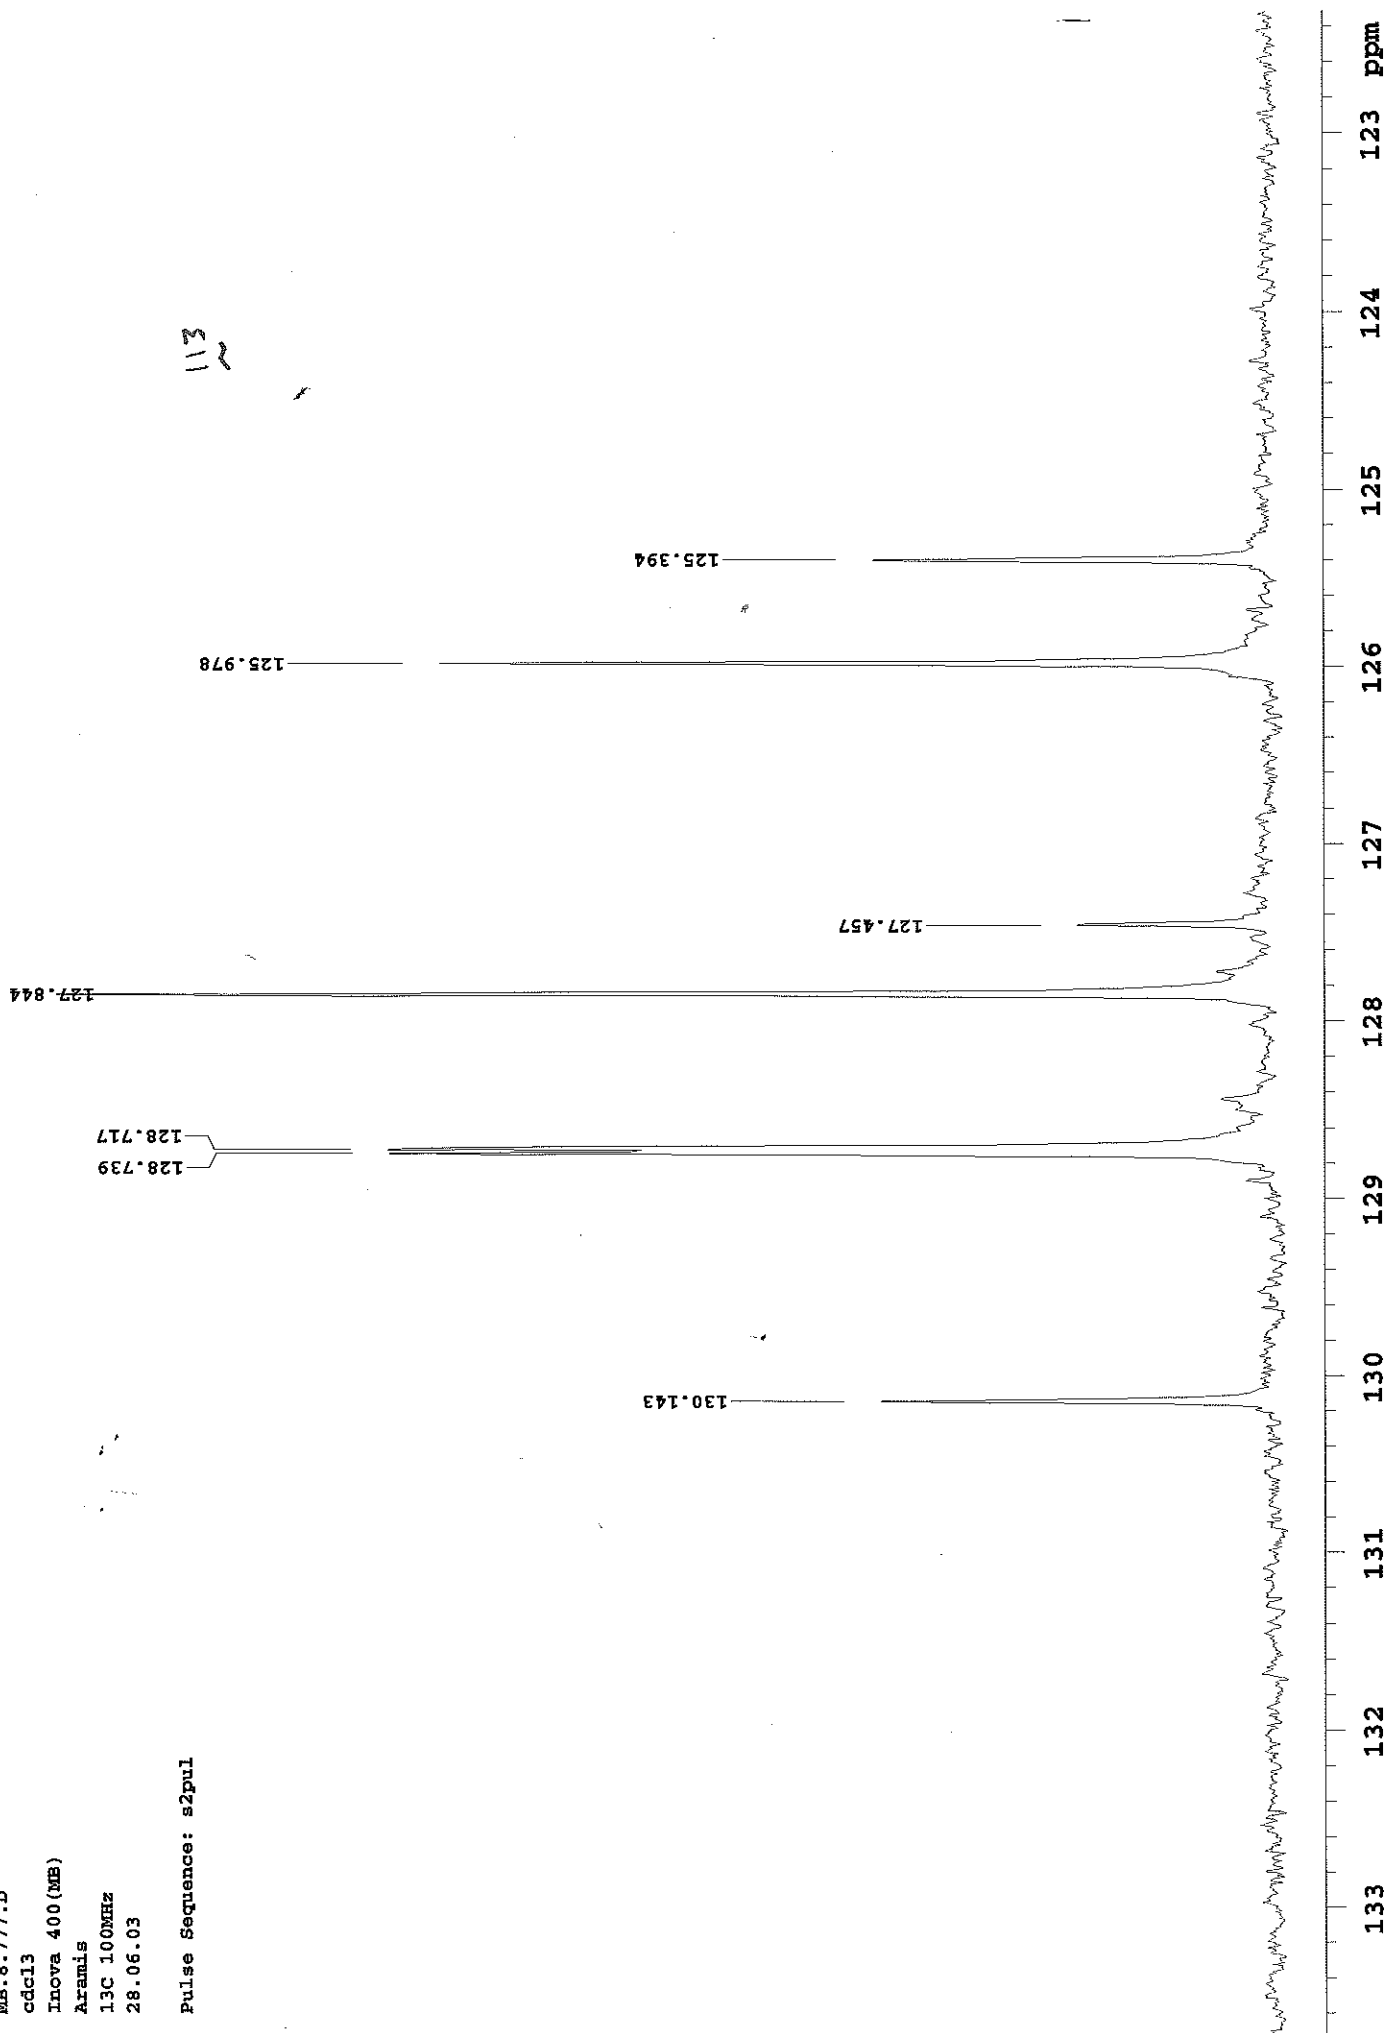



clear oil

EB suzuki  
mPROTON CDCl3 {e:\bruk400data\2012\Oct} ejt 46

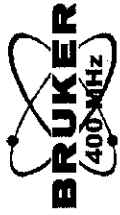

NAME 2012-10-09-ejt-46  
 EXPNO 10  
 PROCNO 1  
 Date\_ 20121009  
 Time 16.26  
 INSTRUM AV400  
 PROBHD 5 mm PABBO BB-  
 PULPROG zg30b  
 TD 65536  
 SOLVENT CDCl3  
 NS 16  
 DS 0  
 SWH 8264.463 Hz  
 FIDRES 0.126106 Hz  
 AQ 3.9649780 sec  
 RG 128  
 DW 60.500 usec  
 DE 9.40 usec  
 TE 294.1 K  
 D1 1.0000000 sec  
 TD0 1

===== CHANNEL f1 =====  
 NUC1 1H  
 P1 10.00 usec  
 PL1 -3.60 dB  
 PL1W 17.83863831 W  
 SF01 400.1324710 MHz  
 SI 32768  
 SF 400.1300104 MHz  
 WDW EM  
 SSB 0  
 LB 0.30 Hz  
 GB 0  
 PC 1.00

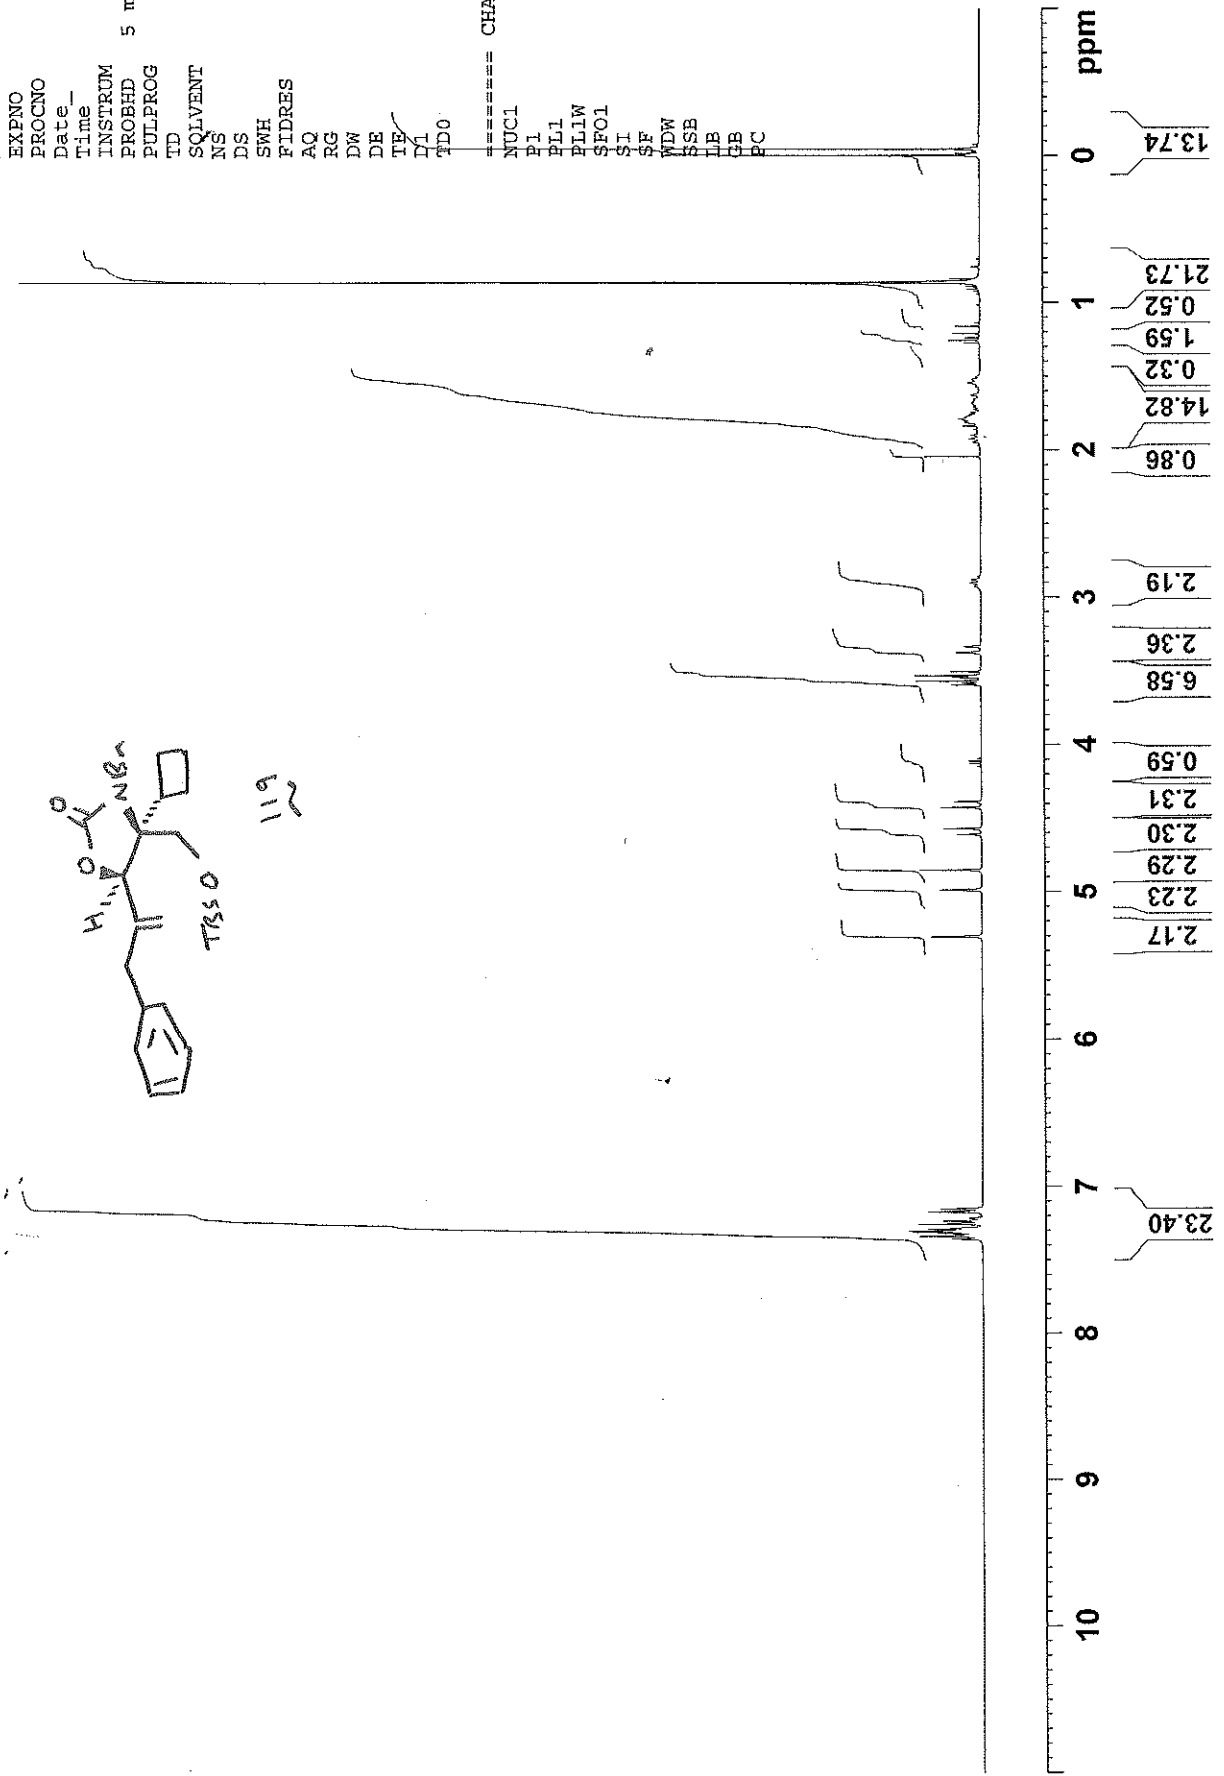

|                        |                                                                                                        |                        |                                                          |                      |                      |
|------------------------|--------------------------------------------------------------------------------------------------------|------------------------|----------------------------------------------------------|----------------------|----------------------|
| Acquisition Time (sec) | 1.0835                                                                                                 | Comment                | Eb_suzuki mCARBON CDC13 (e:\bruk400data\2012\Oct)\ejt_46 | Date                 | 09 Oct 2012 16:40:48 |
| Date Stamp             | 09 Oct 2012 16:40:48                                                                                   |                        |                                                          |                      |                      |
| File Name              | \\ss7a.ds.man.ac.uk\vol5\vol3\users\snmrdata\bruk400data\2012\Oct\data\ejt\nmr\2012-10-09-ejt-46\11fid |                        |                                                          |                      |                      |
| Nucleus                | 13C                                                                                                    | Number of Transients   | 256                                                      | Origin               | AV400                |
| Owner                  | Administrator                                                                                          | Points Count           | 32768                                                    | Pulse Sequence       | zpgg30               |
| SW(cyclical) (Hz)      | 30241.94                                                                                               | Solvent                | CHLOROFORM-d                                             | Spectrum Offset (Hz) | 11329.4600           |
| Sweep Width (Hz)       | 30241.01                                                                                               | Temperature (degree C) | 21.900                                                   | Spectrum Type        | STANDARD             |

2012-10-09-ejt-46.011.esp VerticalScaleFactor = 1

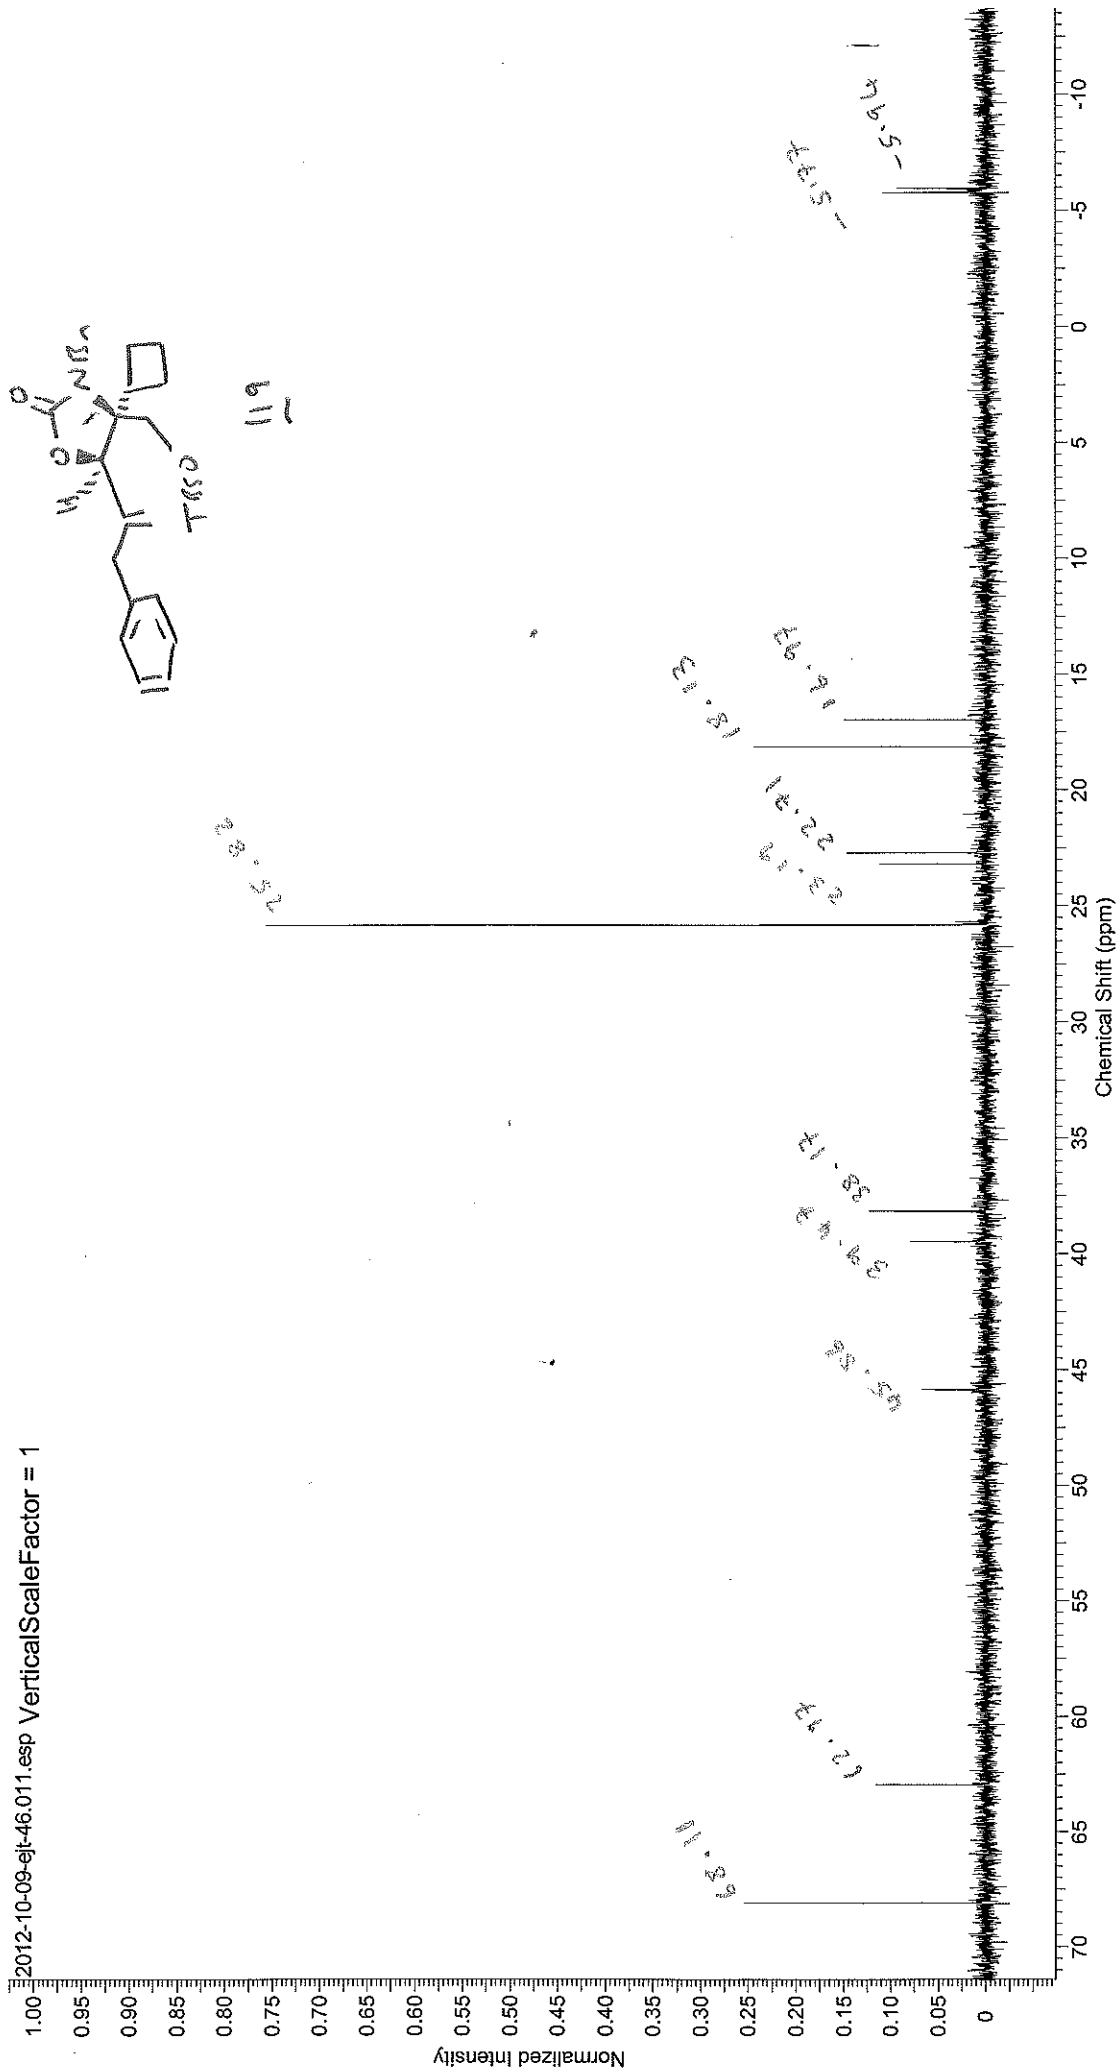

|                        |                                                                                                        |                        |                                                         |                      |                      |
|------------------------|--------------------------------------------------------------------------------------------------------|------------------------|---------------------------------------------------------|----------------------|----------------------|
| Acquisition Time (sec) | 1.0835                                                                                                 | Comment                | Eb suzuki mCARBON CDCl3 (e:\bruk400data\2012\Oct\ejt_46 | Date                 | 09 Oct 2012 16:40:48 |
| Date Stamp             | 09 Oct 2012 16:40:48                                                                                   |                        |                                                         |                      |                      |
| File Name              | \\ss7a.ds.man.ac.uk\vol5\vo3\users\snmr\data\bruk400data\2012\Oct\data\ejt\nmr\2012-10-09-ejt-46\11fid |                        |                                                         |                      |                      |
| Nucleus                | 13C                                                                                                    | Number of Transients   | 256                                                     | Origin               | AV400                |
| Owner                  | Administrator                                                                                          | Points Count           | 32768                                                   | Pulse Sequence       | zgpg30               |
| SW(cyclical) (Hz)      | 30241.94                                                                                               | Solvent                | CHLOROFORM-d                                            | Spectrum Offset (Hz) | 11329.4600           |
| Sweep Width (Hz)       | 30241.01                                                                                               | Temperature (degree C) | 21.900                                                  | Spectrum Type        | STANDARD             |

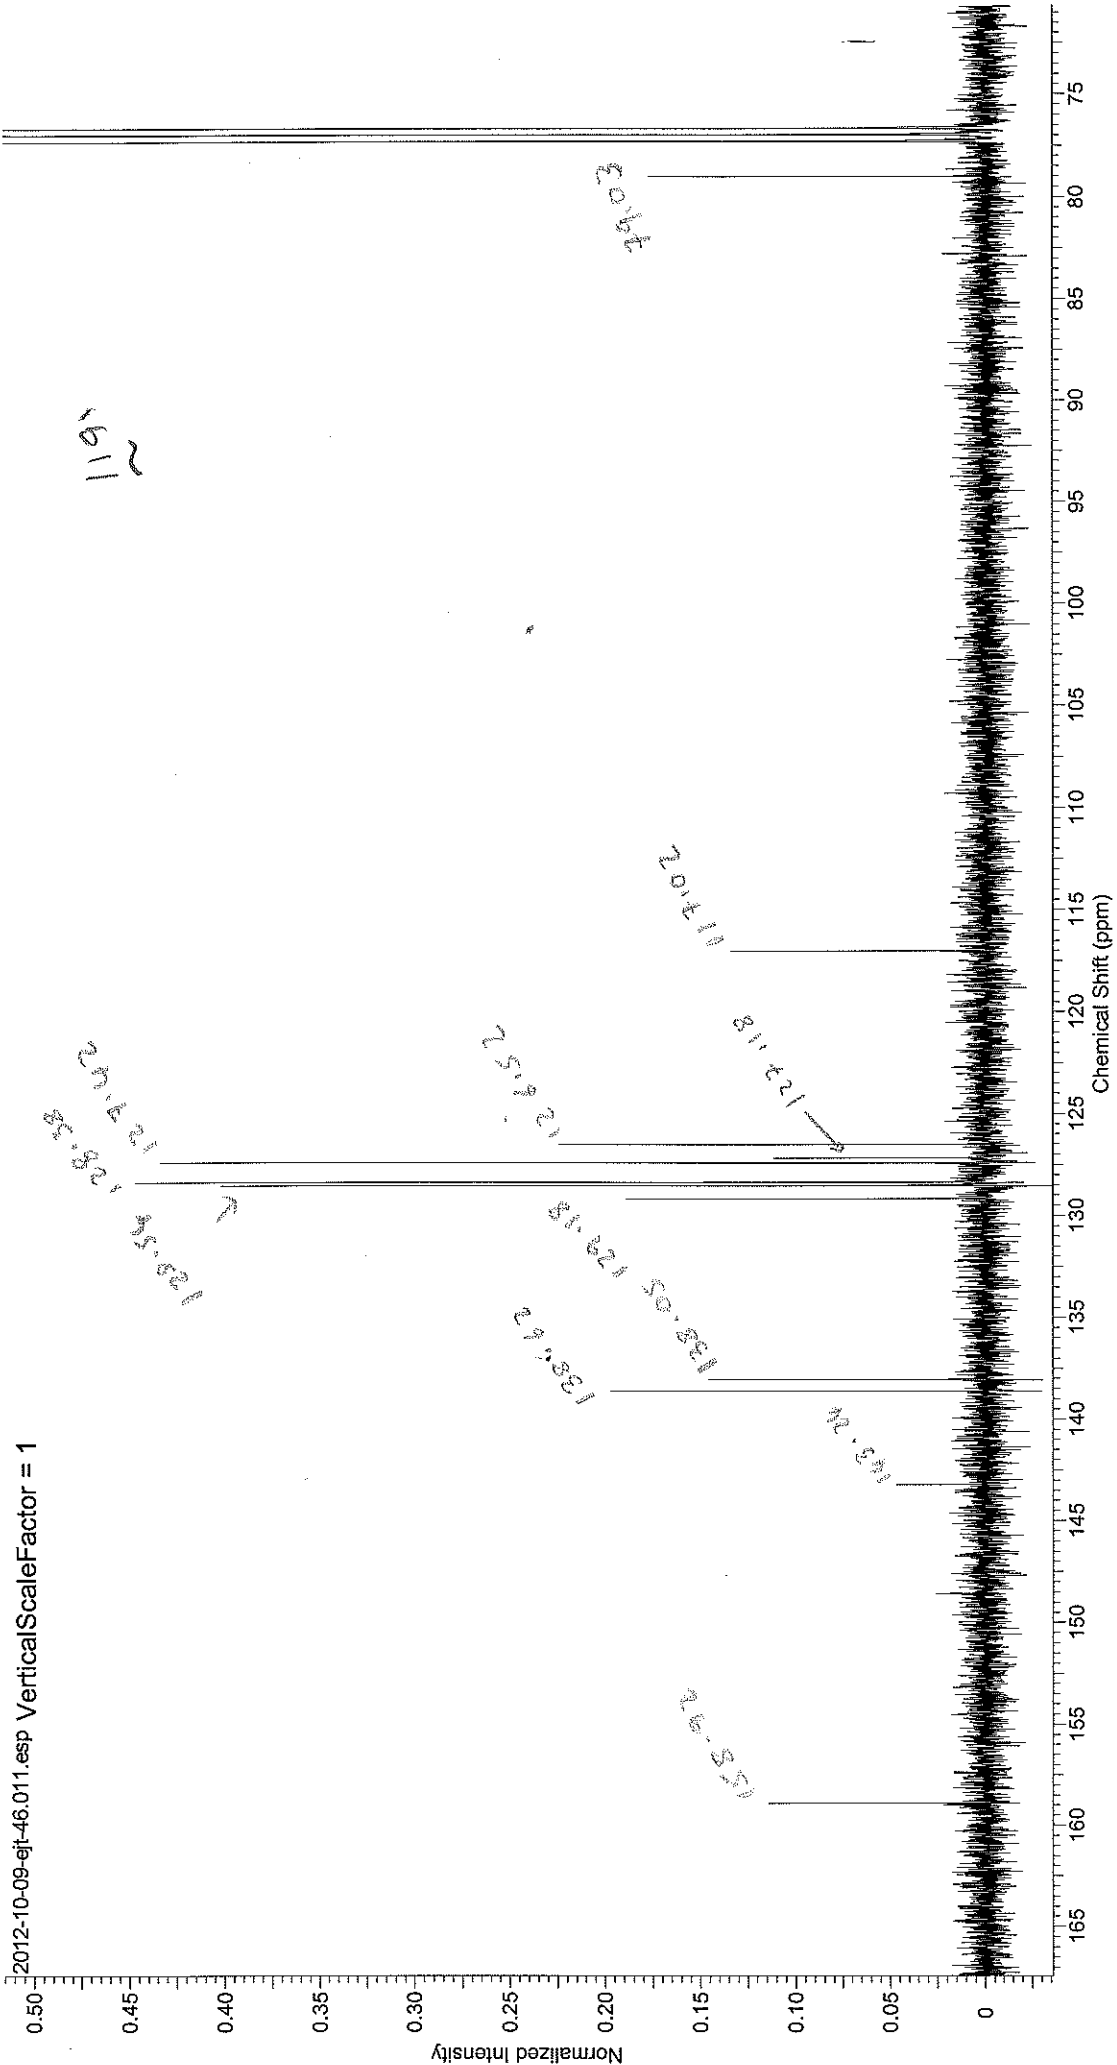



|                        |                                                                                                      |                        |                                                              |                      |                      |
|------------------------|------------------------------------------------------------------------------------------------------|------------------------|--------------------------------------------------------------|----------------------|----------------------|
| Acquisition Time (sec) | 3.1719                                                                                               | Comment                | EB TBS deprot. mPROTON CDC13 /opt/bruk500data/2012/Oct/ejt 1 | Date                 | 18 Oct 2012 09:42:40 |
| Date Stamp             | 18 Oct 2012 09:42:40                                                                                 |                        |                                                              |                      |                      |
| File Name              | \\ss7a.ds.man.ac.uk\vol5\vol3\users\snmr\data\bruk500data\bruk500data\ejt\nmr\2012-10-18-ejt-1\11fid |                        |                                                              |                      |                      |
| Nucleus                | 1H                                                                                                   | Number of Transients   | 16                                                           | Origin               | spect                |
| Owner                  | nmr1                                                                                                 | Points Count           | 32768                                                        | Pulse Sequence       | zg30b                |
| SW(cyclical) (Hz)      | 10330.58                                                                                             | Solvent                | CHLOROFORM-d                                                 | Spectrum Offset (Hz) | 3040.7544            |
| Sweep Width (Hz)       | 10380.26                                                                                             | Temperature (degree C) | 21.973                                                       | Spectrum Type        | STANDARD             |

2012-10-18-ejt-1.011.esp VerticalScaleFactor = 1

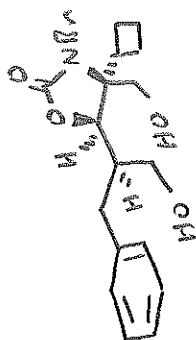

123

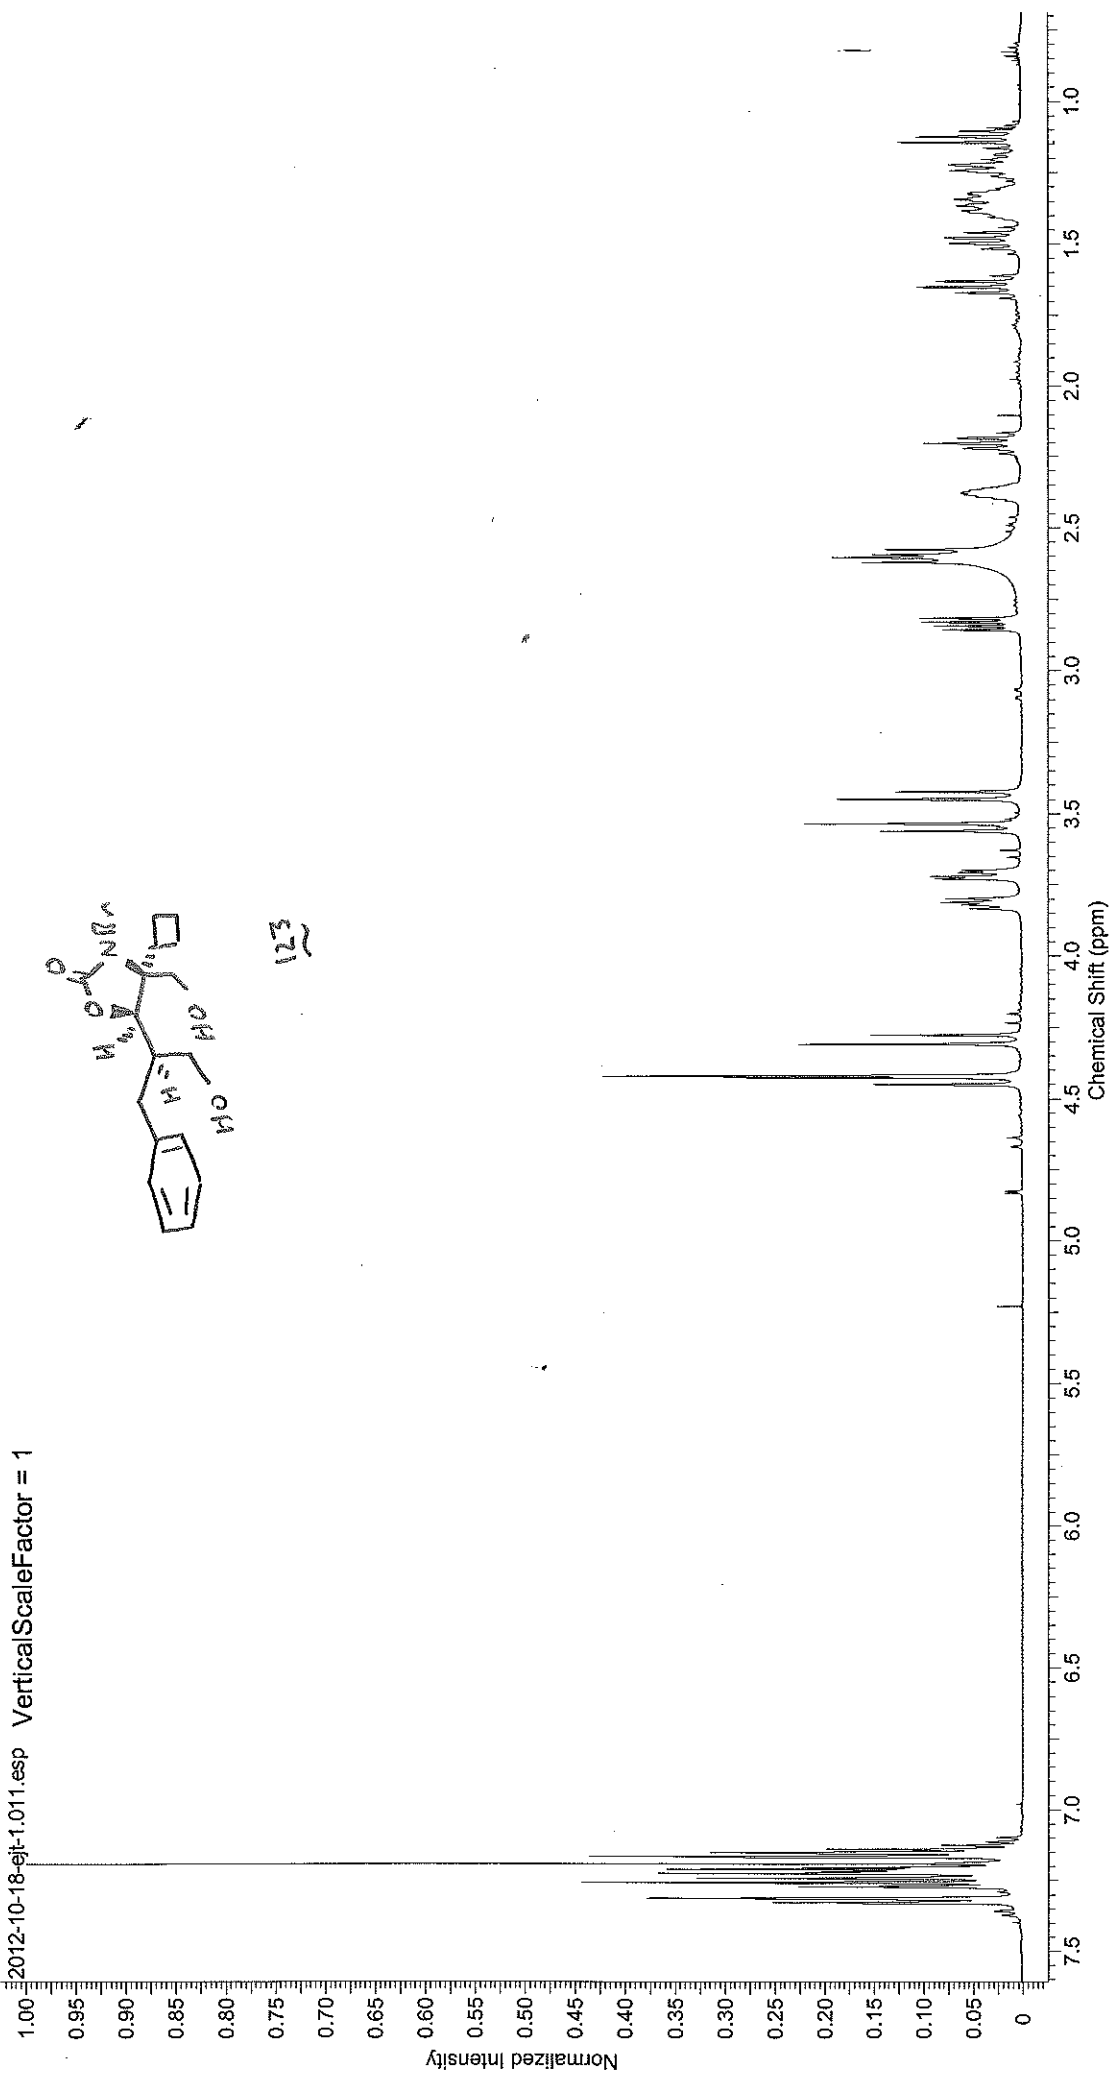



|                        |                                                                                                                    |                        |                                                                  |                      |                      |
|------------------------|--------------------------------------------------------------------------------------------------------------------|------------------------|------------------------------------------------------------------|----------------------|----------------------|
| Acquisition Time (sec) | 3.1719                                                                                                             | Comment                | EB cyclisation f2 mPROTON CDCI3 /opt/bruk500data/2012/Dec ejt_20 | Date                 | 04 Dec 2012 13:56:16 |
| Date Stamp             | 04 Dec 2012 13:56:16                                                                                               |                        |                                                                  |                      |                      |
| File Name              | \\ss7a.ds.man.ac.uk\vol3\users\snmr\data\bruk500\data\bruk500\data\2012\Dec\data\ejt\nmr\2012-12-04-ejt-20_210\fid |                        |                                                                  |                      |                      |
| Nucleus                | 1H                                                                                                                 | Number of Transients   | 16                                                               | Origin               | spect                |
| Owner                  | vnmr1                                                                                                              | Points Count           | 32768                                                            | Pulse Sequence       | zg30b                |
| SW(cyclical) (Hz)      | 10330.58                                                                                                           | Solvent                | CHLOROFORM-d                                                     | Spectrum Offset (Hz) | 3039.4541            |
| Sweep Width (Hz)       | 10330.26                                                                                                           | Temperature (degree C) | 25.029                                                           | Spectrum Type        | STANDARD             |
| Frequency (MHz)        | 500.13                                                                                                             | Original Points Count  | 32768                                                            | Receiver Gain        | 256.00               |

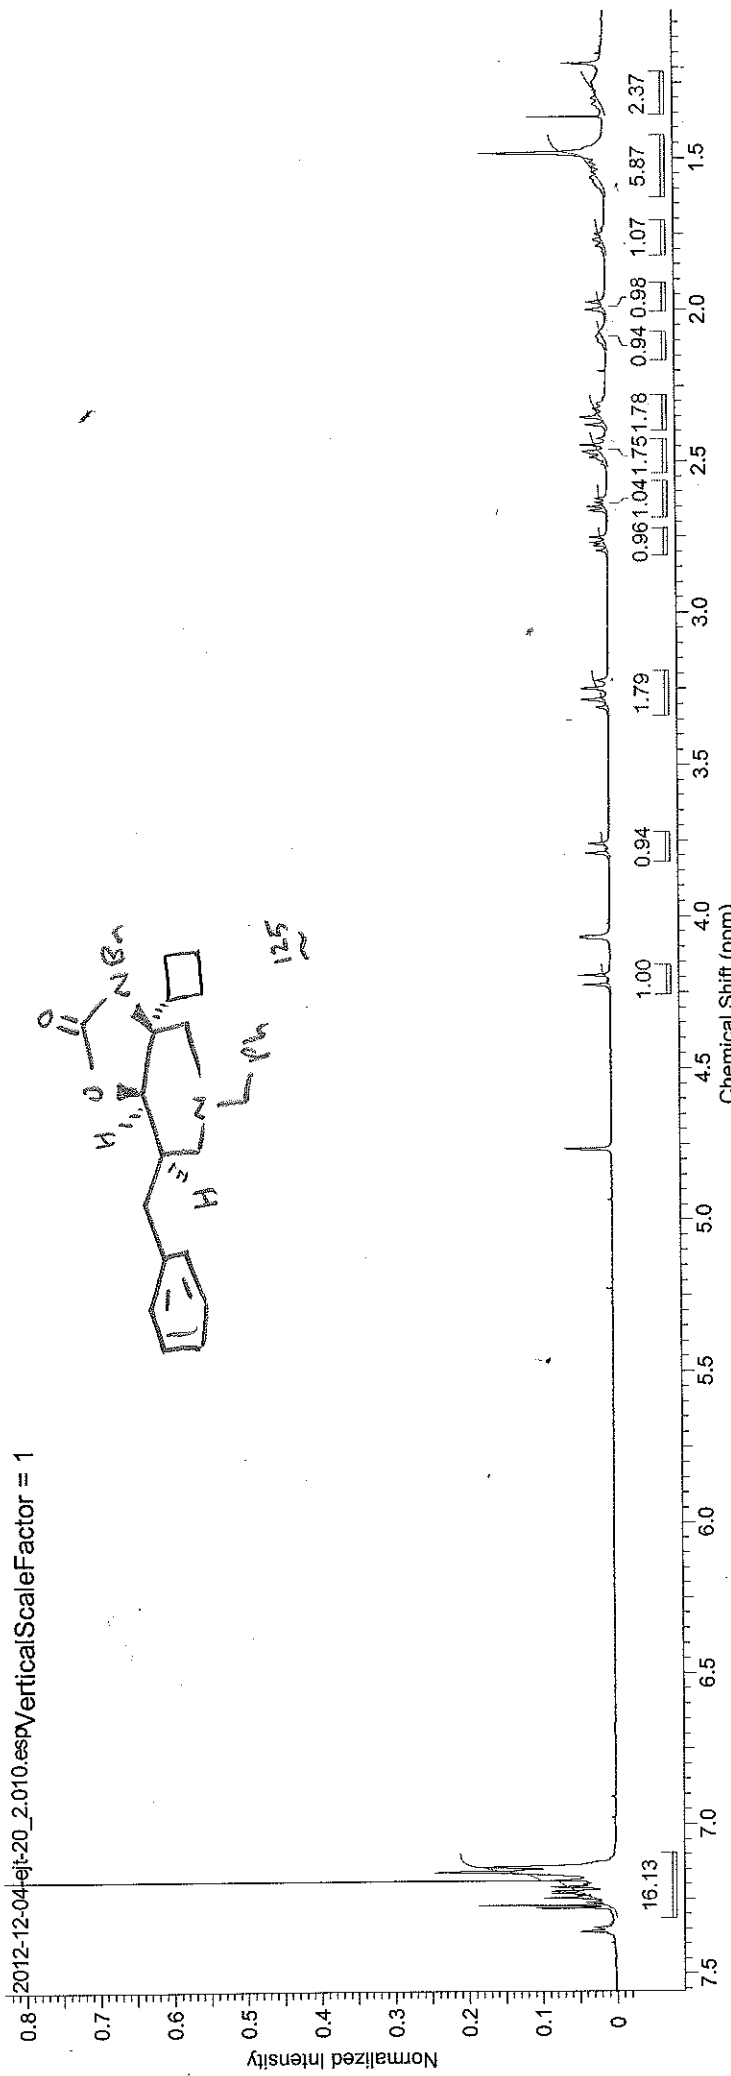

| No. | (ppm)          | Value       | Absolute Value | Non-Negative Value |
|-----|----------------|-------------|----------------|--------------------|
| 8   | 5.801 .. 2.701 | 0.4228306   | 1.20888026e+9  | 1.04228306         |
| 9   | 7.229 .. 2.810 | 0.96146834  | 1.11514829e+9  | 0.96146834         |
| 10  | 1.917 .. 3.331 | 0.78715038  | 2.07280627e+9  | 1.76715038         |
| 11  | 7.229 .. 3.820 | 0.93704081  | 1.08681626e+9  | 0.93704081         |
| 12  | 1.604 .. 4.250 | 0.99897206  | 1.15864653e+9  | 0.99897206         |
| 13  | 9.964 .. 7.316 | 16.12777328 | 1.87056169e+10 | 16.12777328        |

| No. | (ppm)          | Value      | Absolute Value | Non-Negative Value |
|-----|----------------|------------|----------------|--------------------|
| 1   | 2141 .. 1.352  | 3.6910129  | 2.74777549e+9  | 2.36910129         |
| 2   | 4.239 .. 1.625 | 8.7223387  | 6.81084467e+9  | 5.87223387         |
| 3   | 7.051 .. 1.821 | 1.07191539 | 1.24324902e+9  | 1.07191539         |
| 4   | 9.417 .. 2.030 | 0.98170584 | 1.13862054e+9  | 0.98170584         |
| 5   | 0.399 .. 2.130 | 0.94085318 | 1.09123802e+9  | 0.94085318         |
| 6   | 2.810 .. 2.391 | 1.77637959 | 2.06031398e+9  | 1.77637959         |
| 7   | 4.060 .. 2.511 | 1.74655259 | 2.02571942e+9  | 1.74655259         |

EB ncycle - do not touch sample.  
 mCARBON CDCl3 /opt/bruk500data/2013/feb ejt 2

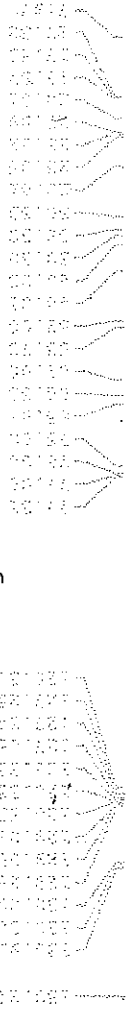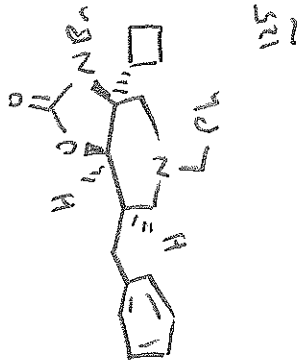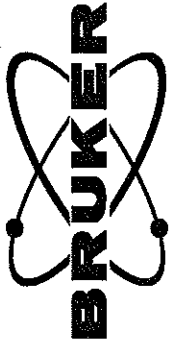

NAME 2013-02-21-ejt-2

EXPNO 10  
 PROCNO 1  
 Date\_ 20130221  
 Time 13.18  
 INSTRUM spect  
 PROBHD 5 mm PABBO BB-  
 PULPROG zgpg30  
 TD 65536  
 SOLVENT CDCl3  
 NS 256  
 DS 2  
 SWH 29761.904 Hz  
 FIDRES 0.454131 Hz  
 AQ 1.1010548 sec  
 RG 512  
 DW 16.800 usec  
 DE 32.78 usec  
 TE 291.7 K  
 D1 2.0000000 sec  
 D11 0.0300000 sec  
 TDO 1

==== CHANNEL f1 =====  
 NUC1 13C  
 P1 8.80 usec  
 PL1 -1.00 dB  
 PL1W 104.35516357 W  
 SF01 125.7703643 MHz

==== CHANNEL f2 =====  
 CPDPRG2 waltz16  
 NUC2 1H  
 PCPD2 80.00 usec  
 PL2 0.00 dB  
 PL12 17.23 dB  
 PL13 120.00 dB  
 PL2W 25.62124252 W  
 PL12W 0.48484197 W  
 PL13W 0.0000000 W  
 SF02 500.1320005 MHz  
 SI 32768  
 SF 125.7577890 MHz  
 WDW EM  
 SSB 0  
 LB 1.00 Hz  
 GB 0  
 PC 1.40

17.5  
 23.1  
 23.8  
 36.3  
 38.3  
 39.3  
 44.8  
 52.6  
 53.7  
 61.9  
 64.5  
 75.5  
 126.31  
 129.20  
 129.3  
 127.8  
 128.2  
 128.3  
 128.5  
 128.9  
 129.0  
 132.0  
 138.3  
 138.9  
 159.2

200 180 160 140 120 100 80 60 40 20 0 ppm
